# **ErbB dysregulation impairs cognition via myelination-dependent and - independent oligodendropathy**

## **Authors**

Xu Hu,<sup>1,4</sup> Guanxiu Xiao,<sup>1,4</sup> Li He,<sup>1,4</sup> Qingyu Zhu,<sup>1</sup> Xiaojie Niu,<sup>1</sup> Huashun Li,<sup>1</sup> Qi Xu,<sup>1</sup> Zhengdong Wei,<sup>1</sup> Hao Huang,<sup>1</sup> Yifei Luan,<sup>1</sup> Mengsheng Qiu,<sup>1</sup> Kenji F. Tanaka,<sup>2</sup> Ying Shen,<sup>3</sup> and Yanmei Tao<sup>1,\*</sup>

## **Affiliations**

<sup>1</sup>Key Lab of Organ Development and Regeneration of Zhejiang Province, Institute of Life Sciences, College of Life and Environmental Sciences, Hangzhou Normal University, Hangzhou 311121, China.

<sup>2</sup>Department of Neuropsychiatry, Keio University School of Medicine, Tokyo 160-8582, Japan.

<sup>3</sup>Department of Neurobiology, Key Laboratory of Medical Neurobiology of Zhejiang Province, Zhejiang University School of Medicine, Hangzhou 310058, China.

<sup>4</sup>These authors contribute equally.

\*Correspondence: [ytao@hznu.edu.cn](mailto:ytao@hznu.edu.cn)

## **Abstract**

White matter abnormalities are an emerging pathological feature of schizophrenia. However, their attributions to the disease remain largely elusive. ErbB receptors and their ligands, some of which are essential for peripheral myelination, confer susceptibility to schizophrenia. By synergistically manipulating ErbB receptor activities in a oligodendrocyte-stage-specific manner in mice after early development, we demonstrate the distinct effects of ErbB signaling on oligodendrocytes at various differentiation states. ErbB overactivation, in mature oligodendrocytes, induces necroptosis causing demyelination, whereas in oligodendrocyte precursor cells, induces apoptosis causing hypomyelination. In contrast, ErbB inhibition increases oligodendrocyte precursor cell proliferation but induces hypomyelination by suppressing the myelinating capabilities of newly-formed oligodendrocytes. Remarkably, ErbB inhibition in mature oligodendrocytes diminishes axonal conduction under energy stress and impairs working memory capacity independently of myelin pathology. This study reveals the etiological implications of oligodendrocyte vulnerability induced by ErbB dysregulation, and elucidates the pathogenetic mechanisms for variable structural and functional white matter abnormalities.

## 1 **Introduction**

2 Adolescence is the critical period for the central nervous system (CNS) to completely  
3 develop and mature. In particular, CNS myelin generated by oligodendrocytes (OLs)  
4 is one of the most developmentally active component in the adolescent brain. This  
5 may lead to CNS myelin being a highly susceptible target in psychiatric disorders  
6 such as schizophrenia which typically develops during adolescence (*Fields, 2008*;  
7 *Hoistad et al., 2009*; *Kessler et al., 2007*; *Peters and Karlsgodt, 2015*). A growing  
8 body of literature points to abnormalities in the structure, component proteins, or  
9 regulating molecules of CNS myelin in schizophrenic patients (*Douaud et al., 2007*;  
10 *Fields, 2008*; *Hof and Schmitz, 2009*; *Hoistad et al., 2009*; *Kelly et al., 2018*;  
11 *Uranova et al., 2011*). Schizophrenia is increasingly viewed as a spectrum disorder  
12 based on varied symptom severity and genetic risk. Especially, white-matter  
13 microstructural changes as examined by structural brain imaging techniques are  
14 sensitive to the symptom severity or genetic loading of schizophrenic patients  
15 (*Karlsgodt, 2020*). Therefore, understanding schizophrenia related myelin  
16 pathogenesis is crucial for the development of diagnostic standards or therapeutic  
17 targets given that it is one of the most promising features whose progression can be  
18 examined periodically in patients.

19 Tyrosine kinase receptors ErbB(1-4) mediate the signaling of numerous growth  
20 factors which are categorized into the neuregulin (NRG) family and the epidermal  
21 growth factor (EGF) family (*Iwakura and Nawa, 2013*; *Mei and Nave, 2014*). The  
22 NRG and EGF family members bind differentially to the four ErbB receptors. Due to  
23 the indispensable function of NRG1-ErbB signaling in peripheral myelination (*Nave  
24 and Salzer, 2006*), it was expected that NRG-ErbB signaling played a role in CNS  
25 myelin development. However, the contradictory results from different research

26 groups have silenced any significance of this previous postulate (*Brinkmann et al.*,  
27 2008; *Makinodan et al.*, 2012; *Schmucker et al.*, 2003; *Taveggia et al.*, 2008). Genetic  
28 ablation of *NRG1* or *ErbB4*, the ligand and receptor that have received extensive  
29 attention from researchers in schizophrenia field (*Harrison and Law*, 2006; *Mei and*  
30 *Nave*, 2014), induces neither developmental alteration nor pathogenesis in white  
31 matter of mutant mice (*Brinkmann et al.*, 2008). However, studies combining genetic  
32 linkage analysis and brain imaging techniques have associated *NRG1* or *ERBB4*  
33 variability with reduced white matter density or integrity in human subjects (*McIntosh*  
34 *et al.*, 2008; *Winterer et al.*, 2008; *Zuliani et al.*, 2011).

35 Notably, in addition to *NRG1* and *ErbB4*, many molecules in the ErbB signaling  
36 pathways exhibit single nucleotide polymorphisms (SNPs) or aberrant expression that  
37 are implicated in schizophrenia or other psychiatric disorders. Both gain and loss of  
38 ErbB signaling have been indicated by genetic and biochemical studies (*Harrison and*  
39 *Law*, 2006; *Mei and Nave*, 2014). Particularly, *NRG1* and *ErbB4* have been revealed  
40 to increase the mRNA levels, protein levels, or receptor activity in the schizophrenic  
41 brain (*Chong et al.*, 2008; *Hahn et al.*, 2006; *Joshi et al.*, 2014; *Law et al.*, 2006; *Law*  
42 *et al.*, 2012). It is noteworthy that *EGFR* (*ErbB1*), which only binds the EGF family  
43 ligands, is elevated in the brain of schizophrenic patients (*Futamura et al.*, 2002) and  
44 shows potential in regulating oligodendrogenesis in developmental and pathological  
45 conditions (*Aguirre et al.*, 2007). Thus, *NRG-ErbB* and *EGF-ErbB* signaling may be  
46 synergistic in the regulation of CNS myelin integrity.

47 In the CNS, OL precursor cells (OPCs) after terminal mitosis differentiate into  
48 newly-formed OLs (NFOs). NFOs then span differentiation states from pre-  
49 myelinating OLs to newly myelinating OLs. Myelinating OLs effectively generate  
50 myelin sheaths in a short time window before further differentiating into mature OLs

51 (MOs) that maintain the myelin sheath (*Bergles and Richardson, 2015; Czopka et al.,*  
52 *2013; Hughes et al., 2018; Tripathi et al., 2017; Watkins et al., 2008; Xiao et al.,*  
53 *2016*). To study whether ErbB receptors, through mediating NRG-ErbB and EGF-  
54 ErbB signaling, cooperate to regulate OLs and CNS myelin, we adopted an inducible  
55 pan-ErbB strategy and manipulated ErbB receptor activities specifically in OL lineage  
56 cells *in vivo*. This strategy allowed us to avoid characterizing the complex  
57 composition of ErbB ligands or receptors in OL lineage cells and helped us focus on  
58 their cellular function. The results reveal that ErbB dysregulation differentially affects  
59 OPCs, NFOs, and MOs, leading to CNS demyelination, hypomyelination, and even  
60 OL dysfunction that causes cognitive deficits independently of myelin pathology.

61

62

## 63 **Results**

### 64 **ErbB overactivation in OLs induces demyelination and hypomyelination**

65 Studies on OL-specific knock-out mice have validated the expression of ErbB3 and  
66 ErbB4 in OLs (*Brinkmann et al., 2008*), while phosphorylated EGFR is detected in  
67 OLs by immunostaining (*Palazuelos et al., 2014*). We characterized the expression of  
68 ErbB receptor members in subcortical white matter regions at different postnatal days.  
69 Note that the subcortical white matter regions isolated from mice before P5 had few  
70 myelin components. Our results indicate that ErbB2 is barely expressed in mouse  
71 CNS myelin, whereas EGFR, ErbB3 and ErbB4 are expressed with relatively stable  
72 levels during juvenile to adolescent development (Figure 1-figure supplement 1A,B).

73 To manipulate ErbB receptor activities in the OL lineage of mice, we employed  
74 tetracycline-controlled systems whose induction or blockade depends on the presence  
75 of doxycycline (Dox). We first characterized the impact of elevated ErbB receptor  
76 activities on CNS myelin by generation of *Plp-tTA;TRE-ErbB2<sup>V664E</sup>* (*Plp-ErbB2<sup>V664E</sup>*)  
77 bi-transgenic ‘Tet-Off’ mice (Figure 1A). Notably, *Plp-ErbB2<sup>V664E</sup>* mice around P35  
78 exhibited severe ataxia while walking on a grid panel (Figure 1B). Moreover, *Plp-*  
79 *ErbB2<sup>V664E</sup>* mice showed difficulty in rolling over, indicating severely impaired motor  
80 coordination.

81 With the expression and phosphorylation of ectopic ErbB2<sup>V664E</sup>, endogenous  
82 ErbB receptors (EGFR, ErbB3 and ErbB4) were strikingly phosphorylated and  
83 activated in the white matter of *Plp-ErbB2<sup>V664E</sup>* mice (Figure 1C,D). Overactivation of  
84 ErbB receptors caused lower myelin staining intensity as exhibited in the corpus  
85 callosum of *Plp-ErbB2<sup>V664E</sup>* mice at 9 days post Dox-withdrawal (dpd) after LFB  
86 staining. Notably, at 14 dpd, myelin loss became more evident throughout the corpus  
87 callosum, suggesting that *Plp-ErbB2<sup>V664E</sup>* mice were undergoing CNS demyelination  
88 after Dox withdrawal (Figure 1E,F). Consistently, western blotting revealed loss of  
89 myelin basic protein (MBP), an indicator for MOs and myelin, in the brain of *Plp-*  
90 *ErbB2<sup>V664E</sup>* mice (Figure 1G). Moreover, the electron microscopic examination (EM)  
91 of the myelin ultrastructure revealed that myelin sheaths of some axons in *Plp-*  
92 *ErbB2<sup>V664E</sup>* mice ruptured or underwent breakdown (Figure 1H,I and Figure 1-figure  
93 supplement 2A), consistent with the idea of demyelination. Due to demyelination,  
94 only a few intact axons were detected in the midline of the corpus callosum of *Plp-*  
95 *ErbB2<sup>V664E</sup>* mice at 14 dpd (Figure 1H,I). When axonal tracts in the corpus callosum  
96 were immunostained by TuJ1, the antibody recognizing neuronal specific  $\beta$ -tubulin III,  
97 the immunoreactivity dramatically reduced in *Plp-ErbB2<sup>V664E</sup>* mice at 14 dpd (Figure

98 1-figure supplement 2B). In addition, as a pathological condition, demyelination is  
99 usually complicated and aggravated by the pathological responses from nearby  
100 astrocytes and microglia. Indeed, in the white matter of *Plp-ErbB2<sup>V664E</sup>* mice,  
101 astrogliosis and microgliosis were revealed (Figure 1J,K).

102 Interestingly, despite the demyelination, the detectable axons, throughout the  
103 corpus callosum, optic nerve, and prefrontal cortex in *Plp-ErbB2<sup>V664E</sup>* mice, were  
104 hypermyelinated. Myelinated axons detected in the brain of *Plp-ErbB2<sup>V664E</sup>* mice had  
105 significantly smaller g-ratio (axon diameter/fiber diameter), a quantitative indication  
106 of myelin thickness for individual axons with different diameters (Figure 1I). Myelin  
107 thickness showed no difference between *TRE-ErbB2<sup>V664E</sup>* and littermate *Plp-tTA* mice  
108 after Dox withdrawal (Figure 1-figure supplement 2C). Therefore, hypermyelination  
109 of detectable axons in *Plp-ErbB2<sup>V664E</sup>* mice was a result of the overexpression of  
110 *ErbB2<sup>V664E</sup>*, which was detected by an antibody against ErbB2 (Figure 1C,G).

111 Hypermyelination of individual axons in *Plp-ErbB2<sup>V664E</sup>* mice phenocopied that  
112 observed in NRG1-overexpressing mice (*Brinkmann et al., 2008*). Notably, EM  
113 examination of the ultrastructure in *Plp-ErbB2<sup>V664E</sup>* mice at 9 dpd revealed that most  
114 axons were intact in the midline of the corpus callosum, although they have been  
115 significantly hypermyelinated (Figure 1-figure supplement 2D,E). These results  
116 confirmed that hypermyelination occurs early in *Plp-ErbB2<sup>V664E</sup>* mice, and  
117 demyelination and axonal degeneration in *Plp-ErbB2<sup>V664E</sup>* mice are pathological  
118 events induced secondarily by continuous ErbB activation.

119 Next, we examined the effects of ErbB activation on CNS myelin by a ‘Tet-on’  
120 system generated in *Sox10<sup>+/-rtTA</sup>;TRE-ErbB2<sup>V664E</sup>* (*Sox10-ErbB2<sup>V664E</sup>*) mice (Figure  
121 1L). *Sox10-ErbB2<sup>V664E</sup>* mice with Dox feeding from P21 developed severe motor

122 dysfunction, including ataxia and tremors, and died around P35. As a result, *Sox10-*  
123 *ErbB2<sup>V664E</sup>* and littermate control mice were investigated at P30 after 9 days with  
124 Dox-feeding (dwd). These mice had smaller body sizes at P30 and walked with  
125 difficulty on a grid panel (Figure 1M). Western blotting revealed the expression and  
126 phosphorylation of ectopic *ErbB2<sup>V664E</sup>* accompanied with increases in  
127 phosphorylation of ErbB3 and ErbB4, but not that of EGFR, in the white matter of  
128 *Sox10-ErbB2<sup>V664E</sup>* mice (Figure 1N,O). Brain slices stained by LFB exhibited lower  
129 staining intensity in the white matter of *Sox10-ErbB2<sup>V664E</sup>* mice (Figure 1P,Q),  
130 consistent with the lower MBP levels detected by western blotting (Figure 1N,O). The  
131 examination of the ultrastructure by EM revealed that the axons in the corpus  
132 callosum and optic nerve of *Sox10-ErbB2<sup>V664E</sup>* mice exhibited thinner myelin with  
133 significantly increased *g*-ratio (Figure 1S). *Sox10<sup>+rtTA</sup>* is a knock-in mouse line, so  
134 that the allele with *Sox10-rtTA* would not transcribe *Sox10* mRNA (Ludwig *et al.*,  
135 2004). We analyzed the ultrastructure of myelinated axons in *Sox10<sup>+rtTA</sup>* and  
136 littermate *TRE-ErbB2<sup>V664E</sup>* mice at P30 and did not observe any differences (Figure 1-  
137 figure supplement 2F), therefore we can exclude the possible effect of  
138 haploinsufficiency of *Sox10* on late postnatal myelin development.

139 It is notable that in *Sox10-ErbB2<sup>V664E</sup>* mice, the numbers of myelinated axons  
140 were not altered (Figure 1R), and myelin sheaths exhibited normal morphology  
141 (Figure 1S). Moreover, neither microgliosis nor astrogliosis was detected in the white  
142 matter of *Sox10-ErbB2<sup>V664E</sup>* mice (Figure 1T,U). Because there was no indication of  
143 inflammatory pathogenesis, we can conclude that thinner myelin in *Sox10-ErbB2<sup>V664E</sup>*  
144 white matter are caused by developmental deficits not pathological conditions.  
145 Therefore, ErbB activation in *Sox10-ErbB2<sup>V664E</sup>* mice induces CNS hypomyelination  
146 rather than demyelination.



147

148 ***Plp-tTA* targets mainly MOs whereas *Sox10*<sup>+rtTA</sup> targets OPC-NFOs**

149 The finding that *Plp-ErbB2*<sup>V664E</sup> and *Sox10-ErbB2*<sup>V664E</sup> mice had no overlaps in  
150 histological and biochemical phenotypes was unexpected considering that *Sox10* is  
151 reported to express throughout the OL lineage, and *Sox10*<sup>+rtTA</sup> knock-in mice have  
152 been used to investigate all OL lineage cells (*Wegener et al., 2015*). Because the  
153 induction of the ‘Tet-on’ or ‘Tet-off’ system by Dox feeding or Dox withdrawal has a  
154 delayed effect on gene expression, and reporter proteins could accumulate to label the  
155 consecutive cellular stages, the results obtained by using *TRE*-controlled reporter  
156 mice fail to accurately reveal the original cells targeted by tTA or rtTA. To  
157 circumvent this problem, we delivered a *TRE*-controlled fluorescence reporter carried  
158 by an adeno-associated virus (AAV) into the mouse brains at P14 or P35, and  
159 examined tTA- or rtTA-targeted cells as well as their derivatives within 2 days.

160 *Plp-tTA* mice were raised with no Dox feeding, whereas *Sox10*<sup>+rtTA</sup> were fed  
161 with Dox for 3 days before the stereotactic injection (Figure 2A). One or 2 days after  
162 virus injection, the reporter-expressing (YFP<sup>+</sup>) cells were all immunopositive for  
163 *Olig2* in both mouse lines at either age (Figure 2-figure supplement 1A-D),  
164 confirming their OL lineage specificity. To analyze the differentiation stage  
165 specificity, we immunostained AAV-*TRE*-YFP infected brain slices with an antibody  
166 for NG2 or PDGFR $\alpha$  that labels OPCs, or the antibody CC1 that labels post-mitotic  
167 OLs. The results showed that very few (4-7%) YFP<sup>+</sup> cells were OPCs, while 92-97%  
168 of them were post-mitotic OLs 1 or 2 days after virus injection in *Plp-tTA* mice at  
169 either age, as well as in *Sox10*<sup>+rtTA</sup> mice at P14 (Figure 2B,C and Figure 2-figure  
170 supplement 1A-D). However, for *Sox10*<sup>+rtTA</sup> mice at P35, approximately 26% of

171 YFP<sup>+</sup> cells were OPCs 1 day after virus injection, and it decreased to 8% after 1 more  
172 day (Figure 2C). It is known that OPCs can differentiate into NFOs as quick as 2.5  
173 hours (Xiao *et al.*, 2016). These results may suggest that most OPCs targeted by  
174 *Sox10*-rtTA at P35 are undergoing terminal differentiation (tOPCs), and *Sox10*-rtTA  
175 increasingly targets tOPCs from P14 to P35.

176 There are also OL lineage cells belonging to the NFO stage that includes a  
177 transition from CC1<sup>-</sup> to CC1<sup>+</sup>.  $\beta$ -catenin effector TCF4 is specifically expressed in the  
178 NFO stage (Fancy *et al.*, 2009; Fu *et al.*, 2009; Ye *et al.*, 2009), which is present in a  
179 subset of Olig2<sup>+</sup> cells but is absent in OPCs (PDGFR $\alpha$ <sup>+</sup>) in mice at P30 (Figure 2D).  
180 In *Sox10*<sup>+rtTA</sup> mice at P14, immunostaining revealed that approximately 49% of YFP<sup>+</sup>  
181 cells were NFOs (TCF4<sup>+</sup>) 1 day after virus injection, but it reduced to 28% after 1  
182 more day (Figure 2E,G). TCF4<sup>+</sup> cells found in the corpus callosum at P35 were far  
183 fewer than P14, and these cells appeared as clusters (Figure 2-figure supplement 1E).  
184 Interestingly, in *Sox10*<sup>+rtTA</sup> mice at P35, YFP<sup>+</sup> cells were mostly found in regions  
185 with TCF4<sup>+</sup> cell clusters (Figure 2-figure supplement 1E), where approximately 56%  
186 of YFP<sup>+</sup> cells were TCF4<sup>+</sup> 1 day after virus injection and it reduced to 29% after 1  
187 more day (Figure 2F,G). The half reduction of NFO percentage in YFP<sup>+</sup> cells from  
188 day 1 to day 2 was consistent with the previous report that NFOs differentiate into  
189 MOs in 1 or 2 days (Xiao *et al.*, 2016). There was another possibility that the  
190 transcriptional activity of *Sox10*-rtTA was low in MOs, and thus took more days to  
191 generate detectable YFP levels. We analyzed the densities of TCF4<sup>+</sup>YFP<sup>+</sup> cells and  
192 found that they reduced to half from day 1 to day 2 after viral infection in *Sox10*<sup>+rtTA</sup>  
193 mice at either P14 or P35 (Figure 2H). The results excluded the possibility that the  
194 reduction of NFO ratio in YFP<sup>+</sup> cells was due to the increase of targeted MOs, and  
195 confirmed the maturation of labeled NFOs from day 1 to day 2. A similar transition

196 rate is applicable for targeted NFOs from day 0 to day 1. Therefore, these results  
197 corroborate that the majority of cells targeted by *Sox10*-rtTA at the time of AAV-  
198 *TRE*-YFP infection were tOPCs and NFOs (Figure 2I).

199 AAV-*TRE*-YFP in *Plp*-tTA mice also labeled some TCF4<sup>+</sup> cells, which  
200 comprised only 7-12% of YFP<sup>+</sup> cells 1 or 2 days after virus injection at either age  
201 (Figure 2E-H). It was noticeable that *Plp*-tTA did not specifically target TCF4<sup>+</sup> cell  
202 clusters in the corpus callosum at P35 (Figure 2-figure supplement 1F). These results  
203 implied that *Plp*-tTA did not specifically target the tOPC or NFO stage but randomly  
204 expressed in the OPC-NFO period at a low ratio. Conversely, 90% of the YFP<sup>+</sup> cells  
205 were TCF4<sup>-</sup> and 92-97% were CC1<sup>+</sup> in *Plp*-tTA mice at either P14 or P35, suggesting  
206 that *Plp*-tTA steadily targets MOs after early development (Figure 2I).

207

## 208 **ErbB overactivation causes MO necroptosis and OPC apoptosis**

209 With an understanding of the differentiation stage-specific targeting preferences of  
210 *Sox10*<sup>+rtTA</sup> and *Plp*-tTA mice, we investigated the cellular mechanisms that determine  
211 the different myelin responses in *Plp*-ErbB2<sup>V664E</sup> and *Sox10*-ErbB2<sup>V664E</sup> mice. We  
212 found intact post-mitotic OLs (CC1<sup>+</sup>) decreased in the corpus callosum of *Plp*-  
213 ErbB2<sup>V664E</sup> mice starting from 6 dpd (Figure 3A-C). The CC1<sup>+</sup> cells with striking  
214 number reduction were MOs because the densities of NFOs (TCF4<sup>+</sup>) did not show  
215 significant change (Figure 3-figure supplement 1B,C). Meanwhile, OPCs  
216 (NG2<sup>+</sup>Olig2<sup>+</sup>) pathologically regenerated (Ki67<sup>+</sup>Olig2<sup>+</sup>) in the trunk of corpus  
217 callosum, indicating that the pathogenetic factor was released in the myelin-enriched  
218 region (Figure 3-figure supplement 1A-E).

219 MO number reduction occurred earlier than the time when demyelination was  
220 obviously observed in the corpus callosum of *Plp-ErbB2*<sup>V664E</sup> mice, suggesting that  
221 oligodendropathy may be the cause of demyelination. We examined the corpus  
222 callosum of *Plp-ErbB2*<sup>V664E</sup> mice by TdT-mediated dUTP nick end labeling (TUNEL)  
223 assay, and observed as little apoptotic signaling as that in controls (Figure 3D,E). This  
224 result reveals that the degenerating CC1<sup>+</sup> cells were necrotic rather than apoptotic.  
225 Consistently, the OL nuclei associated with the destroyed myelin sheaths in *Plp-*  
226 *ErbB2*<sup>V664E</sup> mice were regular nuclei without apoptotic chromatin condensation  
227 (Figure 1-figure supplement 2A). In support of this theory, MLKL, the protein  
228 mediating cell necroptosis (*Cai et al., 2014*) as well as the peripheral myelin  
229 breakdown after nerve injury (*Ying et al., 2018*), demonstrated an increased  
230 expression in the callosal CC1<sup>+</sup> cells in *Plp-ErbB2*<sup>V664E</sup> mice from 6 dpd (Figure 3F-  
231 H). Necroptosis is a programmed form of necrosis. RIP3 is the kinase at the upstream  
232 of MLKL in this programmed death signaling pathway (*Ofengeim et al., 2015; Sun et*  
233 *al., 2012*). Notably, the expression of RIP3 was also elevated in the callosal CC1<sup>+</sup>  
234 cells in *Plp-ErbB2*<sup>V664E</sup> mice from 6 dpd as revealed by both immunostaining and  
235 western blotting (Figure 3F-H). Based on the timeline, MO necroptosis was the  
236 primary defect induced in *Plp-ErbB2*<sup>V664E</sup> mice, followed by myelin breakdown, OPC  
237 regeneration, axonal degeneration, and other pathological events as reported in  
238 multiple sclerosis (*Bradl and Lassmann, 2010; Ofengeim et al., 2015*).

239 In contrast, for *Sox10-ErbB2*<sup>V664E</sup> mice, a dramatic increase in cell apoptosis  
240 (TUNEL<sup>+</sup>) in the corpus callosum was observed (Figure 3E,I,J). These apoptotic  
241 nuclei were localized in NG2<sup>+</sup> cells (Figure 3K), indicating apoptosis of OPCs. On the  
242 other hand, no increase of MLKL or RIP3 was detected (Figure 3G,H,L), indicating  
243 there was no necroptosis. Notably, both the NG2<sup>+</sup> cells with and without TUNEL<sup>+</sup>

244 nuclei were hypertrophic in *Sox10*-ErbB2<sup>V664E</sup> mice (Figure 3K). This phenomenon  
245 was not revealed for NG2<sup>+</sup> cells in *Plp*-ErbB2<sup>V664E</sup> mice (Figure 3-figure supplement  
246 1B).

247

#### 248 **ErbB inhibition in OPC-NFOs, but not in MOs, induces hypomyelination**

249 Next, to investigate whether ErbB receptors are functionally required for OLs, we  
250 examined the effects of inhibiting ErbB activities in different OL stages on CNS  
251 myelin. To this end, we first generated *Sox10*<sup>+rtTA</sup>; *TRE*-dnEGFR (*Sox10*-dnEGFR)  
252 mice (Figure 4A and Figure 4-figure supplement 1A,B). In line with the inhibitory  
253 effect of dnEGFR on endogenous ErbB activities (*Chen et al., 2017*), phosphorylation  
254 of ErbB3 and ErbB4 was reduced in white matter from *Sox10*-dnEGFR mice at P35  
255 (Figure 4B,C). The phosphorylation of EGFR was not altered in *Sox10*-dnEGFR mice  
256 at P35 (Figure 4B,C), consistent with the finding in *Sox10*-ErbB2<sup>V664E</sup> mice (Figure  
257 1N,O). Myelin thickness and ultrastructures in the white matter of *Sox10*-dnEGFR  
258 and littermate control mice at P35 with 14 dwd did not show significant differences  
259 (Figure 4-figure supplement 1C). Therefore, we raised these mice to adulthood with  
260 continuous Dox feeding. Phosphorylation of EGFR, instead of ErbB3 or ErbB4, was  
261 apparently reduced in the white matter of *Sox10*-dnEGFR mice at P65 (Figure 4B,C).  
262 This change of ErbB receptors targeted by dnEGFR in *Sox10*-dnEGFR mice implied a  
263 switch of functional NRG-ErbB signaling to EGF-ErbB signaling in *Sox10*-rtTA-  
264 targeted cells from adolescence to adulthood.

265 For *Sox10*-dnEGFR mice at P65 with 44 dwd, myelin stained by LFB exhibited  
266 reduced intensity in the trunk of the corpus callosum (Figure 4D). Moreover, axons in  
267 the corpus callosum and optic nerve of *Sox10*-dnEGFR mice at P65 were

268 hypomyelinated in comparison with that of littermate controls (Figure 4E).  
269 Consistently, MBP was reduced in the white matter of *Sox10*-dnEGFR mice at P65  
270 (Figure 4B,C). Therefore, ErbB inhibition in OPC-NFOs starting from P21 results in  
271 hypomyelination in adulthood.

272 On the other hand, we crossed *Plp*-tTA and *TRE*-dnEGFR to generate *Plp*-  
273 tTA;*TRE*-dnEGFR (*Plp*-dnEGFR) mice (Figure 4F and Figure 4-figure supplement  
274 1D,E). Western blotting revealed significant suppression on the phosphorylation of  
275 EGFR, as well as a mild suppression on that of ErbB3 and ErbB4 (Figure 4G,H),  
276 consistent with their overactivation in *Plp*-ErbB2<sup>V664E</sup> mice (Figure 1C,D). No CNS  
277 myelin differences were observed in *Plp*-dnEGFR and littermate control mice at P35  
278 with 14 dpd (Figure 4-figure supplement 1F).

279 We extended our investigation to P65 when dnEGFR still functionally suppressed  
280 ErbB receptor activities in the white matter of *Plp*-dnEGFR mice (Figure 4G,H). Even  
281 in the adult mice, when dnEGFR had been expressed in MOs for 44 days, the brains  
282 of *Plp*-dnEGFR and littermate mice exhibited no difference in LFB-stained myelin  
283 (Figure 4I), MBP protein levels (Figure 4G,H), or myelin ultrastructures (Figure 4J).  
284 These results suggest that the dual blockade of endogenous NRG-ErbB and EGF-  
285 ErbB signaling in MOs does not affect CNS myelin integrity, and that ErbB activities  
286 are not required for the maintenance of CNS myelin after maturation.

287

288 **ErbB activation blocks OPC proliferation and survival, whereas promotes NFO**  
289 **differentiation and myelination**

290 It is intriguing to note that both ErbB inhibition and overactivation in OPC-NFOs  
291 result in hypomyelination in the CNS. This implies that ErbB signaling can regulate

292 CNS myelin development by different mechanisms. To investigate the mechanisms,  
293 we first compared the states of OL lineage cells in *Sox10*-ErbB2<sup>V664E</sup> and *Sox10*-  
294 dnEGFR mice. In line with the finding that OPCs underwent apoptosis, the numbers  
295 of Olig2<sup>+</sup>, NG2<sup>+</sup>, and CC1<sup>+</sup> cells significantly decreased in the corpus callosum of  
296 *Sox10*-ErbB2<sup>V664E</sup> mice (Figure 5A and Figure 5-figure supplement 1A), while there  
297 was no OPC or OL differences between *Sox10*<sup>+rtTA</sup> and *TRE*-ErbB2<sup>V664E</sup> littermates at  
298 P30 with 9 dwd (Figure 5-figure supplement 1A). Further, we found proliferating  
299 OPCs (Ki67<sup>+</sup>Olig2<sup>+</sup>) significantly decreased in the corpus callosum of *Sox10*-  
300 ErbB2<sup>V664E</sup> mice (Figure 5D,G). In contrast, the densities of proliferating OPCs  
301 (Ki67<sup>+</sup>Olig2<sup>+</sup>) and Olig2<sup>+</sup> cells increased in *Sox10*-dnEGFR mice at P65 (Figure  
302 5B,E,G and Figure 5-figure supplement 1B), despite the fact that these increases were  
303 not observed in *Sox10*-dnEGFR mice at P35 (Figure 5-figure supplement 2A-C). No  
304 pathological signs were observed and the increased Olig2<sup>+</sup> cells comprised of both  
305 NG2<sup>+</sup> and CC1<sup>+</sup> cells (Figure 5B and Figure 5-figure supplement 1B). It could not be  
306 determined whether apoptosis decreased in *Sox10*-dnEGFR white matter, as the  
307 apoptotic cells (TUNEL<sup>+</sup>) were minimal in white matter of both *Sox10*-dnEGFR and  
308 control mice (Figure 5H). The consistent results from gain-of-function (*Sox10*-  
309 ErbB2<sup>V664E</sup>) and loss-of-function (*Sox10*-dnEGFR) studies support a negative  
310 regulation of OPC proliferation and survival by ErbB signaling.

311 Neither differences in Olig2<sup>+</sup>, CC1<sup>+</sup>, NG2<sup>+</sup>, or Ki67<sup>+</sup>Olig2<sup>+</sup> cell densities (Figure  
312 5C,F,G; Figure 5-figure supplement 1C; Figure 5-figure supplement 2D-F), nor in  
313 TUNEL<sup>+</sup> cells (Figure 5I), were observed in white matter of *Plp*-dnEGFR mice and  
314 littermate controls at P35 or P65. Different cellular and histological phenotypes in  
315 *Sox10*-dnEGFR and *Plp*-dnEGFR mice consolidated again the different targeting  
316 specificities of *Sox10*<sup>+rtTA</sup> and *Plp*-tTA. Moreover, the conflicting observations that

317 the numbers of post-mitotic OLs (CC1<sup>+</sup>) increased but myelin thickness reduced in  
318 the brain of *Sox10*-dnEGFR mice (Figure 4E and Figure 5B), suggested that ErbB  
319 inhibition in OPC-NFOs had significantly impaired the myelinating capacity of OLs.

320 Given that *Sox10*-dnEGFR and *Sox10*-ErbB2<sup>V664E</sup> mice both exhibited  
321 hypomyelination, they should share a molecular or cellular deficit in myelination. We  
322 performed RNA-seq analyses of subcortical white matter tissues and identified 68  
323 genes which exhibited similar expression tendencies in *Sox10*-ErbB2<sup>V664E</sup> and *Sox10*-  
324 dnEGFR mice (Figure 6A). This group of genes have potential to regulate CNS  
325 myelination. Notably, in addition to *Gsn* and *Itgb4* that have been identified as  
326 characteristic genes for myelinating OLs (*Zhang et al., 2014*), *Enpp6*, *Itpr2*, and  
327 *Slc12a2* as characteristic genes for NFOs also exhibited significantly reduced  
328 expression in both mouse lines, supporting the notion that NFO deficiency contributes  
329 to hypomyelination. We examined the distribution of *Enpp6*-expressing cells by *in*  
330 *situ* hybridization (*Xiao et al., 2016*), and found that *Enpp6*<sup>+</sup> cell numbers were indeed  
331 reduced in the corpus callosum of *Sox10*-dnEGFR mice at P35, although the reduction  
332 became indistinguishable for mice at P65 (Figure 6C,E). We further examined NFOs  
333 by immunostaining for TCF4, and found TCF4<sup>+</sup> cell numbers were also reduced in the  
334 corpus callosum of *Sox10*-dnEGFR mice at P35, although the reduction became  
335 indistinguishable for mice at P65 (Figure 6G,I). Therefore, NFO differentiation was  
336 impaired shortly after ErbB inhibition, although it took 44 days to result in obvious  
337 hypomyelination in *Sox10*-dnEGFR mice. TCF4<sup>+</sup> and *Enpp6*<sup>+</sup> cell numbers were also  
338 reduced in *Sox10*-ErbB2<sup>V664E</sup> mice (Figure 6B,F,E,I), which were due to the shortage  
339 of OPCs for differentiation.

340 Interestingly, we also observed lowered TCF4<sup>+</sup> and *Enpp6*<sup>+</sup> cell numbers in *Plp*-  
341 dnEGFR mice at P35 (Figure 6D,E,H,I). *Plp*-tTA targeted a fraction of NFOs (Figure



342 2E-I). The different myelination states and similar NFO number reduction in *Sox10-*  
343 *dnEGFR* and *Plp-dnEGFR* mice suggest that, besides regulating myelinating  
344 capability of NFOs, ErbB signaling separately regulates another aspect of NFO  
345 differentiation, *i.e.*, the transition time from NFO to MO stage. Indeed, in contrast to  
346 that in *Sox10-dnEGFR* and *Plp-dnEGFR* mice, the ratio of TCF4<sup>+</sup> to CC1<sup>+</sup> cell  
347 densities increased in *Sox10-ErbB2<sup>V664E</sup>* mice (Figure 6J), which may suggest a  
348 prolonged transition to the MO stage for NFOs with ErbB activation.

349

### 350 **ErbB inhibition in MOs disrupts cognitive function in the absence of myelin** 351 **alteration**

352 OLs also offer essential trophic support to neurons in addition to forming myelin  
353 (*Nave and Werner, 2014*). We compared the behavioral performance of *Sox10-*  
354 *dnEGFR* mice, with hypomyelination in most brain regions, and *Plp-dnEGFR* mice,  
355 with normal myelin, to investigate whether disrupting ErbB signaling in MOs induces  
356 deficits other than dysmyelination. *Sox10-dnEGFR* mice performed worse than  
357 control mice in the rotarod test (Figure 7A), and were slightly hypoactive in the open  
358 field test (Figure 7B). Nevertheless, they performed normally in the central/peripheral  
359 zone analysis for assessment of anxiety, stereotyped behavior analysis and social  
360 interaction analysis for potential autistic-like phenotype, prepulse inhibition analysis  
361 for sensory gating, as well as forced swim and tail suspension tests for depression  
362 (Figure 7-figure supplement 1A-E). Interestingly, *Plp-dnEGFR* mice performed  
363 normally, similar to the controls in most tests, except exhibiting a subtle hyperactivity  
364 in the open field test (Figure 7C,D and Figure 7-figure supplement 1F-J). The

365 different results from the two mouse lines implied that the impaired motor  
366 coordination could be attributed to the hypomyelination in the CNS.

367 We further tested these mice in the eight-arm radial water maze, a paradigm  
368 analyzing working memory capacity. It is known that myelin integrity is fundamental  
369 to cognitive performance of patients (*Kujala et al., 1997*). Moreover, although  
370 ErbB3/ErbB4 double knock-out does not induce myelin alteration in the CNS during  
371 early postnatal development (*Brinkmann et al., 2008*), a study of specifically  
372 depleting ErbB3 in mice from P19 has associated CNS hypomyelination with working  
373 memory deficits in adult mice (*Makinodan et al., 2012*). However, not only *Sox10*-  
374 dnEGFR mice, which had CNS hypomyelination, but also *Plp*-dnEGFR mice, which  
375 did not have myelin alteration, had significantly more working memory errors than  
376 control mice (Figure 7E,F and Figure 7-Video 1). Note that they had normal eyesight  
377 as performed in the visible platform test, as well as similar reference memory errors  
378 that indicated unaltered spatial recognition and memory (Figure 7E,F). This  
379 phenotype in *Plp*-dnEGFR mice reveals that working memory deficiency can be  
380 caused directly by ErbB inhibition in MOs through a myelination-independent  
381 mechanism.

382

### 383 **ErbB inhibition in MOs suppresses axonal conduction under energy stress**

384 To determine what kind of function was impaired in white matter tracts of *Plp*-  
385 dnEGFR mice, we acutely isolated the optic nerves from adult mice (P90-P110) and  
386 recorded electrical stimulus-evoked compound action potentials (CAPs). The areas  
387 under CAPs, which are proportional to the total number of excited axons, indicate the  
388 nerve conduction. We found comparable areas under CAPs in *Plp*-dnEGFR optic

389 nerves and control nerves responding to stimuli of the same intensity (Figure 7G). The  
390 maximal CAPs, which represent that all axons in the nerves are excited, were similar  
391 in *Plp*-dnEGFR optic nerves and control nerves (Figure 7G). In contrast, they were  
392 reduced in *Sox10*-dnEGFR optic nerves as compared with littermate controls (Figure  
393 7H). These results reflected that the basic axonal conduction was not affected in *Plp*-  
394 dnEGFR white matter tracts, whereas it was impaired in *Sox10*-dnEGFR white matter  
395 tracts that exhibited hypomyelination.

396 In addition to myelin, macroglial metabolites are important for axonal conduction  
397 maintenance under conditions of energy deprivation (*Funfschilling et al., 2012; Saab*  
398 *et al., 2016; Trevisiol et al., 2017*). We challenged the optic nerves by incubating  
399 them in the oxygen-glucose deprivation (OGD) condition for 60 min. CAPs fell  
400 gradually in control optic nerves, and finally fell to 30% of the initial levels (Figure  
401 7I,J). However, for *Plp*-dnEGFR optic nerves in the OGD condition, CAP failure was  
402 slightly accelerated and aggravated (Figure 7I). Contrarily, for *Sox10*-dnEGFR optic  
403 nerves under the same condition, CAP failure was decelerated and attenuated (Figure  
404 7J). When the glucose and oxygen levels in the bathing medium were restored, CAPs  
405 in control optic nerves and *Plp*-dnEGFR optic nerves recovered to 60% of the initial  
406 levels (Figure 7I,J). However, in *Sox10*-dnEGFR optic nerves, CAPs recovered to 80%  
407 of the initial levels (Figure 7J).

408 It is notable that continuous electrical stimulation caused a baseline CAP decline  
409 in *Plp*-dnEGFR optic nerves, whereas a baseline CAP enhancement in *Sox10*-  
410 dnEGFR optic nerves, before the OGD (Figure 7I,J). Therefore, we further examined  
411 the axonal conduction under a physiological condition with increasing energy  
412 demands generated by neuronal activities (*Saab et al., 2016; Trevisiol et al., 2017*).  
413 By stimulating the control optic nerves with several trains of short bursts with

414 frequency increased from 1 to 100 Hz, we confirmed that the low frequency  
415 stimulation (5-25Hz) has only minor influence on the CAPs, whereas the high  
416 frequency stimulation (50-100Hz) exhausts axonal energy and results in CAP decline  
417 (Figure 7K,L). For *Sox10*-dnEGFR optic nerves, intriguingly, the 5-25Hz electrical  
418 stimuli amplified CAPs and the 50-100Hz stimuli induced smaller CAP decay than  
419 that in control nerves (Figure 7L). In contrast, in *Plp*-dnEGFR optic nerves, either  
420 group of stimuli significantly aggravated the CAP decay (Figure 7K).

421       These results showed that *Sox10*-dnEGFR white matter tracts exhibited resistance  
422 to energy stress induced by both pathological (OGD) and physiological (neuronal  
423 activities) conditions. This may be ascribed to increased OL numbers, as that OLs are  
424 an essential venue for glycolysis and energy substrate production in support of axonal  
425 conduction (*Funfschilling et al., 2012*). In contrast, *Plp*-dnEGFR white matter was  
426 deficient in the maintenance of axonal conduction, especially under physiological  
427 energy stress. It is notable that MO numbers were not altered in *Plp*-dnEGFR mice  
428 that have ErbB inhibition in MOs, whereas ErbB receptors were not inhibited in MOs  
429 of *Sox10*-dnEGFR mice that have increased MOs (Figure 5B,C). Therefore, the  
430 opposite results of *Sox10*-dnEGFR and *Plp*-dnEGFR optic nerves in the energy  
431 challenging studies reveal that ErbB inhibition in MOs impairs the glia-axon energy  
432 coupling efficiency within electrically active neural circuits, which can compromise  
433 the cognitive function in *Plp*-dnEGFR mice in the absence of myelin alteration  
434 (Figure 7F).

435

436

437 **Discussion**

438 Our results demonstrate that both ErbB3/ErbB4 receptors binding to the NRG family  
439 ligands and EGFR binding to the EGF family ligands are functional in adolescent and  
440 adult OLs. With the discovery of two valuable *in vivo* research mouse tools that  
441 differentially target OLs at MO and OPC-NFO stages, we reveal that NRG-ErbB and  
442 EGF-ErbB signaling cooperate in OPCs, NFOs, and MOs to simultaneously regulate  
443 myelination and axonal energy supporting functions. Aberrant ErbB activation or  
444 inhibition causes white matter abnormalities with distinct pathological characteristics  
445 and biological markers (Figure 7M).

446 ErbB overactivation is pathogenetic in MOs through inducing myelin  
447 overproduction and MO necroptosis, which results in demyelination followed by  
448 pathological changes including axon degeneration, OPC regeneration, astrogliosis and  
449 microgliosis. Notably, ErbB overactivation in OPCs induces apoptosis, without  
450 stimulating inflammatory pathological responses in the brain (Figures 1 and 3).  
451 Caspase-8 activation has been reported to be the key event to determine apoptotic fate  
452 of cells (*Oberst et al., 2011*), and defective activation of caspase-8 is critical for  
453 RIP1/RIP3/MLKL signaling to induce OL necroptosis in multiple sclerosis (*Ofengeim*  
454 *et al., 2015*). A cell-type specific RNA-sequencing transcriptome analysis suggests  
455 that caspase-8 is minimally expressed in post-mitotic OLs but is detectable in OPCs  
456 (*Zhang et al., 2014*), which may determine MO necroptosis but OPC apoptosis under  
457 continuous ErbB activation. Interestingly, studies on genetically modified mice that  
458 overexpressing hEGFR in OL lineage cells, or overexpressing NRG1 Type I or Type  
459 III in neurons, did not report myelin pathogenesis (*Aguirre et al., 2007; Brinkmann et*  
460 *al., 2008*). Nevertheless, mice with overactivation of the ErbB downstream signaling  
461 in OL lineage cells exhibit myelin and axonal pathology (*Harrington et al., 2010;*  
462 *Ishii et al., 2016*). *Olig2-cre;Pten*<sup>flox/flox</sup> mice that overactivate PI3K/Akt signaling in

463 OL lineage cells have loosened myelin lamellae in the spinal cord at 14 weeks and  
464 axonal degeneration in the cervical spinal cord fasciculus gracilis at 62 weeks  
465 (*Harrington et al., 2010*). *Plp-CreER;Mek/Mek* mice, which overexpress a  
466 constitutively activated MEK, a MAPK kinase, in OL lineage cells with tamoxifen  
467 induction, show demyelination in the spinal cord 3 months after MAPK (Erk)  
468 overactivation is induced (*Ishii et al., 2016*). Devastating effects of ErbB2<sup>V664E</sup> in  
469 OLs may be due to its potent promotion of endogenous ErbB activation and multiple  
470 downstream signaling. Nevertheless, observations in the present study and in *Olig2-*  
471 *cre;Pten<sup>flox/flox</sup>* and *Plp-CreER;Mek/Mek* mice corroborate the concept that  
472 constitutively activating ErbB signaling in OL lineage cells is pathogenetic, even  
473 though it may take a long time for moderate activation to result in pathological  
474 symptoms.

475 The profound demyelination or hypomyelination in *Plp-ErbB2<sup>V664E</sup>* and *Sox10-*  
476 *ErbB2<sup>V664E</sup>* mice should have disrupted many brain functions, although we could not  
477 evaluate these functions in the two strains by behavioral tests due to their severe  
478 motor dysfunction (Figure 1B,M). Intriguingly, a battery of behavioral tests for  
479 *Sox10-dnEGFR* and *Plp-dnEGFR* mice only revealed working memory deficits for  
480 both of them, except for the impaired motor coordination in *Sox10-dnEGFR* mice that  
481 have moderate hypomyelination (Figure 7A-F and Figure 7-figure supplement 1A-J).  
482 The further analyses emphasize that, although endogenous ErbB activation is required  
483 for both NFOs and MOs, it is used for the control of myelination and glia-axon energy  
484 coupling, respectively. Thus, ErbB inhibition in OLs impairs cognitive functions *via*  
485 myelination-dependent and -independent mechanisms. *Plp-dnEGFR* mice are a good  
486 model to affirm the myelination-independent contributions of OLs to higher brain  
487 function. As exhibited in *Plp-dnEGFR* mice, dual inhibition of NRG-ErbB and EGF-

488 ErbB signaling in MOs does not affect myelin or OL numbers in the adolescent and  
489 adult brains. However, endogenous ErbB activities in MOs are indispensable for the  
490 maintenance of axonal conduction under physiological energy stress (Figure 7I,K),  
491 which are important for neuronal circuit efficiency as well as cognitive performance  
492 (Figure 7F). It is interesting that axonal conduction under energy stress was enhanced  
493 in *Sox10*-dnEGFR white matter tracts (Figure 7J,L), although it remains unclear  
494 whether the improved energy supplementation alleviates or aggravates the cognitive  
495 deficits in *Sox10*-dnEGFR mice (Figure 7E). Multiple questions remain unanswered,  
496 such as ErbB signaling regulates glucose metabolism in MOs or the transportation of  
497 energy metabolites from MOs to axons. ErbB dysregulation disrupts glutamatergic  
498 synaptic transmission in neurons (*Luo et al., 2014; Ting et al., 2011; Woo et al.,*  
499 *2007*). Glutamatergic synaptic transmission onto OLs was recently discovered to be  
500 essential for their energy substrate supply to axons (*Saab et al., 2016*), as well as for  
501 OL development (*Kougioumtzidou et al., 2017*). Therefore, it would be worth  
502 pursuing whether ErbB signaling regulates OL development or the trophic support  
503 from MOs to neurons by modulating glutamatergic synaptic transmission on OLs.

504 The roles of ErbB signaling in CNS myelination have long been debated because  
505 of the contradictory findings reported by different research groups. For example,  
506 ErbB3 has been reported to be dispensable for OL development (*Schmucker et al.,*  
507 *2003*), and ErbB3/ErbB4 double knockout does not result in CNS myelin alteration  
508 (*Brinkmann et al., 2008*). However, there are other reports that indicate inducing  
509 ErbB3 depletion by *Plp*-CreER in OL lineage cells from P19, not P36, results in adult  
510 hypomyelination (*Makinodan et al., 2012*). It is notable that ErbB3 has peaked  
511 expression during P15-P30 (Figure 1-figure supplement 1), and ErbB receptor  
512 manipulation in OPC-NFOs alters ErbB3/4 activities in white matter at P30-35 but not

513 at P65 (Figure 1N and Figure 4B). Note that *Plp*-CreER is a mouse tool that can target  
514 OPCs and their progeny (*Guo et al., 2009*). Therefore, the hypomyelination in *Plp*-  
515 CreER;*ErbB3*<sup>flox/flox</sup> mice is in line with our findings in *Sox10*-dnEGFR mice and  
516 reflects the positive role of ErbB signaling in NFO myelination during late postnatal  
517 development. EGFR is expressed stably in white matter during P20-P40 (Figure 1-  
518 figure supplement 1). The phosphorylation of EGFR is altered in white matter in all  
519 four mouse strains, which have ErbB receptor manipulation either in MOs or in OPC-  
520 NFOs (Figure 1C,N and Figure 4B,G). This suggests the general involvement of  
521 EGFR in OL function and development. The role of EGFR in CNS myelin  
522 development is supported by the report that transgenic mice with overexpression of  
523 hEGFR in all OL lineage cells (*CNP*-hEGFR) have enhanced myelin maturation, and  
524 hypomorphic EGFR mice (*wa2*) have delayed myelin maturation (*Aguirre et al.,*  
525 *2007*). *CNP*-hEGFR mice exhibit enhanced oligodendrogenesis in the subventricular  
526 zone, reflecting the function of EGFR in promoting neural progenitors to differentiate  
527 into OPCs during the early development (*Aguirre et al., 2007*). This is different from  
528 the pathological OPC regeneration revealed in the corpus callosum of *Plp*-*ErbB2*<sup>V664E</sup>  
529 mice. It is notable that *CNP*-hEGFR increases the numbers of myelinated axons but  
530 not myelin thickness (*Aguirre et al., 2007*), which is different from the  
531 hypermyelination phenotype revealed in the CNS of NRG1-overexpressing mice  
532 (*Brinkmann et al., 2008*), suggesting that EGFR unlikely participates in myelin  
533 overproduction in MOs. It will be interesting to know whether the active EGFR, as  
534 revealed in *Plp*-dnEGFR mice (Figure 4G), is required for the trophic supportive  
535 function of MOs.

536 The negative regulation of ErbB activation on OPC proliferation and survival is  
537 unexpected because many *in vitro* studies have suggested otherwise. However, there



538 is an interesting observation in transgenic mice *CNP-dnErbB4*, which are designed to  
539 overexpress a dominant negative ErbB4 mutant that specifically blocks the activities  
540 of ErbB3 and ErbB4 in all OL lineage cells. In this strain, post-mitotic OL numbers  
541 increase 40% in the corpus callosum although axons are hypomyelinated (*Roy et al.*,  
542 2007). Moreover, *Olig2-cre;Pten<sup>fllox/fllox</sup>* mice, which have activation of the PI3K/Akt  
543 pathway in all OL lineage cells, exhibit hypermyelination but decreased OL densities  
544 in the developing corpus callosum (*Harrington et al.*, 2010). These previously  
545 enigmatic observations are now well-explained by our findings that ErbB signaling  
546 plays different roles in OPCs and NFOs.

547 The white matter abnormalities observed in our mouse models are reminiscent of  
548 diverse myelin-related clinical and pathological characteristics in schizophrenic brains,  
549 including reduced white matter volume, decreased OL densities, reduced myelin gene  
550 products, apoptotic OLs, and damaged myelin (*Douaud et al.*, 2007; *Fields*, 2008;  
551 *Hoistad et al.*, 2009; *Uranova et al.*, 2011; *Uranova et al.*, 2007). Elevated ErbB  
552 activation has been repeatedly implicated in schizophrenia, and the increase could be  
553 caused by genetic factors (*Harrison and Law*, 2006; *Law et al.*, 2012). To our  
554 knowledge, we are the first to reveal that ErbB overactivation can primarily induce  
555 oligodendropathy and myelin pathogenesis in white matter, providing a possible  
556 predisposition of a genetic variability in ErbB receptors or ligands to the white matter  
557 lesion. Notably, SNP8NRG243177 with T-allele, which increases NRG1 Type IV  
558 production (*Law et al.*, 2006), is associated with the reduced white matter integrity  
559 (*McIntosh et al.*, 2008) as well as increased psychotic symptoms (*Hall et al.*, 2006) in  
560 schizophrenic patients.

561 Further, ErbB receptors and their ligands have been reported to reduce expression  
562 or lose function in some schizophrenic patients (*Harrison and Law*, 2006; *Mei and*

563 *Nave, 2014*). Specific working memory deficits in *Sox10*-dnEGFR and *Plp*-dnEGFR  
564 mice firmly support that oligodendropathy can be a primary cause for the cognitive  
565 symptoms of schizophrenia. Moreover, myelin is very sensitive to environmental  
566 insults. Modest disruption of ErbB signaling by genetic mutation or SNPs is able to  
567 render myelin vulnerable to such insults, aggravating focal loss of connections under  
568 conditions of stress, ischemia, sleeplessness, trauma, etc. Therefore, OL dysfunction  
569 in patients, which is difficult to measure with current techniques, may eventually  
570 evolve into a detectable structural alteration in white matter that could contribute to  
571 another type of brain dysfunction. Collectively, our study provides novel insights into  
572 the pathophysiology of diseases initiated or aggravated within white matter.

573

574

## 575 **Materials and methods**

### 576 **Animals**

577 *Plp*-tTA transgenic mice (*Inamura et al., 2012*) were from the RIKEN BioResource  
578 Center (Stock No. RBRC05446). *Sox10*<sup>+tTA</sup> mice were from Dr. Michael Wegner  
579 (University Erlangen-Nurnberg, Germany). Transgenic mice *TRE*-ErbB2<sup>V664E</sup> (Stock  
580 No. 010577) and *TRE*-dnEGFR (Stock No. 010575) were from the Jackson  
581 Laboratory (*Chen et al., 2017*). Among ErbB1-4 receptors, ErbB2 that does not bind  
582 to any known ligand is the preferred partner to other ligand-bound ErbB members.  
583 ErbB2<sup>V664E</sup> contains an amino acid mutation (Vla<sub>664</sub>/Glu<sub>664</sub>) within the transmembrane  
584 domain facilitating its dimerization with other ErbB receptors and potentiating their  
585 downstream signaling (*Chen et al., 2017*). DnEGFR, a dominant negative mutant of  
586 EGFR, is a truncated form of EGFR, losing the intracellular kinase domain but

587 retaining the ability to form dimers with other ligand-bound ErbB members. When  
588 overexpressed, dnEGFR efficiently blocks the activation of any endogenous ErbB  
589 receptors under either NRG or EGF stimulation (*Chen et al., 2017*). Unless indicated,  
590 mice were housed under SPF conditions before experiments, in a room with a 12-hr  
591 light/dark cycle with access to food and water *ad libitum*. For biochemical and  
592 histological experiments, *Plp-tTA;TRE-dnEGFR* (*Plp-dnEGFR*), *Plp-tTA;TRE-*  
593 *ErbB2<sup>V664E</sup>* (*Plp-ErbB2<sup>V664E</sup>*), *Sox10<sup>+rtTA</sup>;TRE-dnEGFR* (*Sox10-dnEGFR*), or  
594 *Sox10<sup>+rtTA</sup>;TRE-ErbB2<sup>V664E</sup>* (*Sox10-ErbB2<sup>V664E</sup>*) mice with either sex and their  
595 littermate control mice with matched sex were used. For indicated behavioral tests,  
596 only male mice were used, while both male and female mice were used for the other  
597 behavioral tests because the results were not affected by sex difference. Animal  
598 experiments were approved by the Institutional Animal Care and Use Committee of  
599 the Hangzhou Normal University. For genotyping, the following primers were used:  
600 for *Plp-tTA* (630bp), PLPU-604 5'-TTT CCC ATG GTC TCC CTT GAG CTT,  
601 mtTA24L 5'-CGG AGT TGA TCA CCT TGG ACT TGT; for *Sox10<sup>+rtTA</sup>* (618bp),  
602 *sox10-rtTA1* 5'-CTA GGC TGT CAG AGC AGA CGA, *sox10-rtTA2* 5'-CTC CAC  
603 CTC TGA TAG GT CTT G; for *TRE-dnEGFR* (318bp), 9013 5'-TGC CTT GGC  
604 AGA CTT TCT TT, 7554 5'-ATC CAC GCT GTT TTG ACC TC; for *TRE-*  
605 *ErbB2<sup>V664E</sup>* (625bp), 9707 5'-AGC AGA GCT CGT TTA GTG, 9708 5'-GGA GGC  
606 GGC GAC ATT GTC.

607

#### 608 **Tet-Off or Tet-On treatment of mice**

609 Mice with Tet-system contain genes of tetracycline-controlled transcriptional activator  
610 (tTA) or reverse tetracycline-controlled transcriptional activator (rtTA) driven by cell-

611 specific promoters. When fed with Dox, these mice are able to switch on or off  
612 expression of a gene under the control of *tetracycline-responsive element (TRE)*,  
613 specifically in rtTA- or tTA-expressing cells, which are called ‘Tet-on’ or ‘Tet-off’,  
614 respectively. The offspring of *Sox10<sup>+rtTA</sup>* during the indicated periods were fed with  
615 Dox (2 mg/mL × 10 mL/day from P21 to P35, and 1 mg/mL × 10 mL/day from P35 to  
616 indicated test day) in drinking water to induce the expression of ErbB2<sup>V664E</sup> or dnEGFR  
617 in *Sox10-ErbB2<sup>V664E</sup>* and *Sox10-dnEGFR* mice, respectively (Tet-On). For the offspring  
618 of *Plp-tTA*, Dox was given (Tet-off) from the embryonic day (through pregnant  
619 mothers) to their weaning day at P21 to inhibit the expression of ErbB2<sup>V664E</sup> or  
620 dnEGFR during this period in *Plp-ErbB2<sup>V664E</sup>* or *Plp-dnEGFR* mice (0.5 mg/mL × 10  
621 mL/day of Dox before P21). Water bottles were wrapped with foil to protect Dox from  
622 light. All used littermate control mice were treated the same.

623

#### 624 **Stereotactic injection of AAV viruses**

625 pAAV-*TRE-EYFP* plasmids (Addgene) were packaged as AAV2/9 viruses, and  
626 produced with titers of 2.0E+13 particles per mL by OBio (Shanghai, China). Mice  
627 were anesthetized by 1% pentobarbital (50 mg/kg, i.p.) and mounted at stereotaxic  
628 apparatus (RWD68025). AAV-*TRE-EYFP* (2 μL) was injected into the corpus  
629 callosum (from bregma in mm, M-L: ±1.2, A-P: +0.5, D-V: -2.2) under the control of  
630 micropump (KDS310) at a speed of 0.05 μL/min. Injecting needles (Hamilton NDL  
631 ga33/30 mm/pst4) were withdrawn 10 min after injection. Infected brains were  
632 isolated 1 or 2 days later and brain slices were immunostained with anti-GFP antibody  
633 to enhance the visualization of the reporter protein.

634

## 635 **Electron Microscopy**

636 Mice were anesthetized and transcardially perfused with 4% sucrose, 4%  
637 paraformaldehyde (PFA) and 2% glutaraldehyde in 0.1 M phosphate buffer (PB, pH  
638 7.4). The brains, optic nerves, or sciatic nerves were isolated carefully. The corpora  
639 callosa and prefrontal cortices were further dissected carefully under stereoscope.  
640 Tissues were post-fixed overnight at 4°C in 1% glutaraldehyde in 0.1 M PB. Samples  
641 were washed by 0.1 M PB 24 hr later, and osmicated with 2% osmium tetroxide 30-  
642 60 min at 4°C, washed by 0.1 M PB and by deionized H<sub>2</sub>O at 4°C, and dehydrated in  
643 graded (50-100%) ethanol. Samples were incubated with propylene oxide and  
644 embedded with embedding resins. Ultrathin sections were stained with 2% uranyl  
645 acetate at 4°C for 30 min, and then photographed with Tecnai 10 (FEI). EM images  
646 were analyzed by Image J (NIH). To eliminate the bias on circularity, *g*-ratio of each  
647 axon was calculated by the perimeter of axons (inner) divided by the perimeter of  
648 corresponding fibers (outer). Axonal diameters were normalized by perimeters  
649 through equation: diameter = perimeter/ $\pi$ . This procedure allows for inclusion of  
650 irregularly shaped axons and fibers and helps to eliminate biased measurement of  
651 diameters based on circularity. For quantitative analysis, cross sections of each neural  
652 tissue were divided into 5 areas, and more than two images, randomly selected from  
653 each area, were examined.

654

## 655 **Immunofluorescence staining**

656 Deeply anesthetized mice were transcardially perfused with 0.01 M PBS and then 4%  
657 PFA in 0.01 M PBS. Mouse brains were isolated and post-fixed in 4% PFA in 0.01 M  
658 PBS overnight at 4 °C, and then transferred into 20% and subsequently 30% sucrose

659 in PBS overnight at 4 °C. Brains were then embedded in OCT (Thermo Fisher  
660 scientific) and sectioned into 20 µm on a cryostat sectioning machine (Thermo Fisher  
661 scientific, Microm HM525). Brain slices were incubated with blocking buffer (10%  
662 fetal bovine serum and 0.2% Triton-X-100 in 0.01 M PBS) for 1 hr at room  
663 temperature, and then incubated at 4 °C overnight with primary antibodies diluted in  
664 blocking buffer. The primary antibodies used were: GFP (1:500, Abcam, ab13970),  
665 CC1 (1:500, Abcam, ab16794), NG2 (1:200, Abcam, ab50009), Ki67 (1:400, Cell  
666 Signaling Technology, 9129), GFAP (1:2000, Millipore, MAB360), Iba1 (1:1000,  
667 Millipore, MABN92), TCF4 (1:500, Millipore, 05-511), Olig2 (1:500, Millipore,  
668 AB9610), TUJ1 (1:500, Sigma, T5076), RIP3 (1:500, QED, 2283), MLKL (1:500,  
669 Abgent, AP14272B). After washing three times with 0.1% Triton-X-100 in 0.01 M  
670 PBS, samples were incubated at room temperature for 1 hr with Alexa-488 or -594  
671 secondary antibody, and then washed and mounted on adhesion microscope slides  
672 (CITOTEST) with fluorescent mounting medium. Nuclear labeling was completed by  
673 incubating slices with DAPI (0.1 µg/mL, Roche) at room temperature for 5 min after  
674 incubation with secondary antibodies. Except for the antibody against NG2, antigen  
675 retrieval in 0.01 M sodium citrate buffer (pH 6.0) at 80-90 °C for 10 min was  
676 necessary before primary antibody incubation for brain slices to achieve definitive  
677 signals. Images were taken by a Zeiss LSM710 confocal microscope or a Nikon  
678 Eclipse 90i microscope. For cell counting based on immunostaining results, soma-  
679 shaped immunoreactive signals associated with a nucleus was counted as a cell. The  
680 immunostaining intensity was measured by Image J with background subtraction.

681

682 **Luxol fast blue (LFB) staining**

683 After sufficient washing with 0.01 M PBS, PFA-fixed brain slices were transferred  
684 into a mixture of trichloromethane and ethanol (volume ratio 1:1) for 10 min and then  
685 95% ethanol for 10 min. They were next incubated in 0.2% Luxol fast blue staining  
686 solution (0.2 g Solvent blue 38, 0.5 mL acetic acid, 95% ethanol to 100 mL) at 60 °C  
687 overnight. In the next day, tissues were incubated for 5 min each in turn in 95%  
688 ethanol, 70% ethanol and ddH<sub>2</sub>O for rehydration, followed by incubation alternatively  
689 in 0.05% Li<sub>2</sub>CO<sub>3</sub>, 70% ethanol and ddH<sub>2</sub>O for differentiation until the contrast  
690 between the gray matter and white matter became obvious. After that, tissues were  
691 incubated for 10 min each in 95% and 100% ethanol to dehydrate, and then 5 min in  
692 dimethylbenzene to clear, before quickly mounting with neutral balsam mounting  
693 medium (CWBIO). All steps were operated in a ventilation cabinet. The LFB  
694 intensity in the corpus callosum was measured by Image J with background  
695 subtraction, and normalized to that of controls.

696

#### 697 **TUNEL assay**

698 Apoptotic cells were examined with terminal deoxynucleotidyl transferase (TdT)-  
699 mediated deoxyuridine triphosphate (dUTP) nick-end labeling (TUNEL) assay  
700 according to the manufacturer's instructions (Vazyme; Yeasen). In brief, PFA-fixed  
701 brain slices were digested for 10 min by proteinase K (20 µg/mL) at room temperature.  
702 After washing twice with PBS, brain slices were incubated with Equilibration Buffer  
703 for 30 min at room temperature, and subsequently with Alexa Fluor 488-12-dUTP  
704 Labeling Mix for 60 min at 37°C. After washing with PBS three times, brain slices  
705 were stained with DAPI before being mounted under coverslips. For co-labeling of

706 apoptotic nuclei in slices with immunofluorescence staining, TUNEL assay was  
707 performed after washing of the secondary antibody.

708

### 709 **Western blotting**

710 Subcortical white matter tissues were isolated and homogenized. Homogenates in  
711 lysis buffer (10 mM Tris-Cl, pH 7.4, 1% NP-40, 0.5% Triton-X 100, 0.2% sodium  
712 deoxycholate, 150 mM NaCl, 20% glycerol, protease inhibitor cocktail) at a ratio of 2  
713 mL per 100 mg tissue were lysed overnight in 4°C. Lysates were centrifuged at  
714 12,000 g and 4°C for 15 min to get rid of the unsolved debris. Concentration of the  
715 supernatant was measured by BCA assay. Proteins in samples were separated by 6-12%  
716 SDS-PAGE, transferred to a Immobilon-P Transfer Membrane (Millipore), and then  
717 incubated with indicated primary antibodies diluted in blocking buffer at 4°C  
718 overnight after blocking by 5% non-fat milk solution in TBST (50 mM Tris, pH 7.4,  
719 150 mM NaCl, 0.1% Tween 20) for 1 hr at room temperature. The primary antibodies  
720 used were: pErbB3 (1:2500, Abcam, ab133459), pErbB4 (1:2500, Abcam, ab109273),  
721 pErbB2 (1:2500, Abgent, AP3781q), EGFR (1:5000, Epitomics, 1902-1), pEGFR  
722 (1:2500, Epitomics, 1727-1), GAPDH (1:5000, Huabio, EM1101), MBP (1:1000,  
723 Millipore, MAB382), Olig2 (1:1000, Millipore, MABN50), ErbB3 (1:200, Santa  
724 Cruz Biotechnology, sc-285), ErbB4 (1:200, Santa Cruz Biotechnology, sc-283),  
725 ErbB2 (1:200, Santa Cruz Biotechnology, sc-284), RIP3 (1:2000, QED, 2283),  
726 MLKL (1:2000, Abgent, AP14272B). For antibodies against phosphorylated proteins,  
727 10% fetal bovine serum was used as blocking buffer. Next day, the membranes were  
728 washed by TBST for three times and incubated with the secondary antibodies for 1 hr  
729 at room temperature. Membranes were washed again and incubated with Immobilon



730 Western Chemiluminescent HRPSubstrate (Millipore) for visualization of  
731 chemiluminescence by exposure to X-ray films or Bio-Rad GelDOCXR<sup>+</sup> Imaging  
732 System. Intensities of protein bands were measured by Image J, and statistical  
733 analysis was performed after subtraction of the background intensity and  
734 normalization with controls in each batch of experiments.

735

### 736 ***In situ* hybridization**

737 RNA *in situ* hybridization was performed as previously described (*Schaeren-Wiemers*  
738 *and Gerfin-Moser, 1993*) with minor modifications. Briefly, the 14 µm PFA-fixed  
739 brain sections were post-fixed in 4% PFA in PBS for 20 min, incubated in 2 µg/mL  
740 Proteinase K in 50 mM Tris-Cl (pH 7.4) with 5 mM EDTA at room temperature for  
741 10 min, re-fixed in 4% PFA in PBS for another 10 min, and then acetylated in 1.33%  
742 triethanolamine and 0.25% acetic anhydride solution at room temperature for 10 min.  
743 The acetylated sections were washed and incubated in hybridization buffer (50%  
744 formamide, 0.25 mg/mL yeast RNA, 0.5 mg/mL herring sperm DNA, 5x Denhard's,  
745 5x SSC, Invitrogen) at room temperature for 1 hr, and then hybridized with 0.5 ng/µL  
746 digoxigenin-labeled *Enpp6* riboprobe in hybridization buffer at 65°C for 16 hr. The  
747 hybridized sections were washed three times in 0.2x SSC at 65°C for total 1 hr, and  
748 then were blocked with 10% sheep serum (Sigma-Aldrich) in solution I containing  
749 100 mM pH 7.5 Tris-Cl with 0.15 M NaCl at room temperature for 1 hr, followed by  
750 incubation with alkaline phosphatase-conjugated anti-digoxigenin antibody (Roche)  
751 in the same solution at 4°C overnight. After washing three times with solution I for  
752 total 1 hr, and twice with developing buffer containing 100 mM pH 9.5 Tris-Cl, 0.1 M  
753 NaCl, 50 mM MgCl<sub>2</sub> and 0.1% Tween-20, the sections were incubated with 2%

754 NBT/BCIP solution (Roche) in the developing buffer at room temperature in the dark.  
755 The reaction was stopped by immersing the sections in PBS with 5 mM EDTA when  
756 appropriate signals were detected. To obtain mouse *Enpp6* riboprobes, a 1.3 kb  
757 fragment corresponding to *Enpp6* mRNA (1400–2700 nt of NM\_177304.4) was  
758 cloned into pBluescript II KS(-). The linearized plasmids were used as templates for  
759 *in vitro* transcription with T3 RNA polymerase (Promega) according to the  
760 manufacturer's instructions.

761

### 762 **Real-time reverse transcription-PCR (RT-PCR)**

763 Total RNA was extracted from isolated mouse white matter using TRIzol following  
764 manufacturer's protocol. cDNA was synthesized by using the 5x All-In-One RT  
765 MasterMix (abmGood). Real-time PCR was performed in four repeats for each sample  
766 by using BrightGreen 2x qPCR MasterMix (abmGood) with the Bio-Rad CFX96 real-  
767 time PCR system as previously described (*Chen et al., 2017*). Relative mRNA levels  
768 were analyzed by software Bio-Rad CFX Manager 1.5. Transcripts of targeted genes  
769 were normalized to those of mouse 18S rRNA gene in the same samples. Primers for  
770 18S rRNA were 5'-CGG ACA CGG ACA GGA TTG ACA and 5'-CCA GAC AAA  
771 TCG CTC CAC CAA CTA with a 94 bp PCR product. Primers for mouse EGFR gene  
772 and transgene dnEGFR were 5'-TCC TGC CAG AAT GTG AGC AG and 5'-ACG  
773 AGC TCT CTC TCT TGA AG with a 500 bp PCR product.

774

### 775 **RNA-Seq Analyses**

776 Subcortical white matter tissues isolated from *Sox10*-dnEGFR and littermate controls,  
777 or *Sox10*-ErbB2<sup>V664E</sup> mice and littermate controls, were used (three pairs for each

778 group) for global transcriptome analysis by LC-Bio Co (Hangzhou, China). The final  
779 transcriptome was generated by Histat and StringTie. StringTie was used to estimate  
780 the expression level for mRNAs by calculating FPKM (Fragments Per Kilobase of  
781 exon model per Million mapped reads). Differentially expressed genes were identified  
782 by comparing FPKM of the mRNA reads from three sample pairs between *Sox10*-  
783 *dnEGFR*, or *Sox10*-*ErbB2*<sup>V664E</sup> mice, and their littermate controls, by paired Student *t*  
784 test via MeV (MultiExperiment Viewer). Gene lists with significant difference ( $P <$   
785 0.05) in expression between *Sox10*-*dnEGFR* and littermate controls, or between  
786 *Sox10*-*ErbB2*<sup>V664E</sup> and littermate controls, were compared, and genes with similar  
787 expression tendencies in *Sox10*-*dnEGFR* and *Sox10*-*ErbB2*<sup>V664E</sup> mice were identified.  
788 Z value of these genes was calculated according to their FPKM by an equation “Z  
789 sample-i = [ (log2(Signal sample-i)-Mean (Log2(Signal) of all samples)) / [Standard  
790 deviation (Log2(Signal) of all samples) ]” and plotted as heat map by MeV. Gene  
791 Ontology (GO) term enrichment was analyzed by PANTHER Overrepresentation Test  
792 (Released 20171205) through <http://geneontology.org> with the significance estimated  
793 by Fisher’s Exact Test (FDR, false discovery rate).

794

## 795 Behavioral Tests

796 *Plp*-*ErbB2*<sup>V664E</sup> mice at P35 and *Sox10*-*ErbB2*<sup>V664E</sup> mice at P30 after indicated Dox  
797 treatment were used in grid walking tests for motor function analysis. Behavioral  
798 analyses for *Sox10*-*dnEGFR* and littermate controls with Dox-feeding from P21, or  
799 *Plp*-*dnEGFR* mice and littermate controls with Dox-withdrawal from P21, were  
800 carried out with 12- to 16-week-old animals by investigators unaware of their  
801 genotypes. Tested mutant mice had littermate control mice with same sex. For PPI,

802 social interaction, eight-arm radial water maze, forced swim and tail suspension, all  
803 tested mice were male. Animals were tested at a sequence of open field, social  
804 interaction, rotarod, PPI, eight-arm radial water maze, and then forced swim and tail  
805 suspension, to minimize the influence of stress on their behavioral performance.  
806 There were 2-day gaps between tests.

807

808 **Open field and stereotyped behavior analysis:** Animals were placed in a chamber  
809 (30 cm × 30 cm × 34.5 cm) and their movements were monitored and traced by a  
810 tracking software EthoVision XT 12 (Noldus, The Netherland). Locomotive activity  
811 was measured and summated at 5-min intervals over a 30-min period. Frequency and  
812 cumulative duration of stereotyped behaviors observed during 30-min traveling in the  
813 open field, including grooming, hopping, rearing supported, and sniffing, were  
814 determined by EthoVision XT 12 and statistically analyzed. Anxiety of the animals  
815 was assessed by the differences of time that they spent in the central zone and  
816 peripheral zone during the 30 min.

817

818 **Rotarod:** To evaluate the sensorimotor coordination, mice were placed on an  
819 accelerating rotarod (Mouse Rota-Rod NG, Harikul Science, UB47650, Italy) and  
820 assessed for ability to maintain balance on the rotating bar that accelerated from 4 to  
821 40 rpm over a 5-min period. Mice were tested for 4 trials in the first day with 30-min  
822 gap between trials, and were tested for another 4 trials 24 hr later. Latency before fall  
823 from the rod was recorded.

824

825 **Prepulse inhibition (PPI) test:** These tests were conducted in a sound-attenuated  
826 chamber (Panlab, LE116, Spain). Mice were placed in a Plexiglas restrainer mounted  
827 on a grid floor, and their startle responses were captured by a movement sensor and  
828 analyzed by a software Startle v1.2. Before the test, mice were allowed to habituate to  
829 the chamber with a 60 dB background white noise for 5 min, and to 4 times of  
830 auditory-evoked startle stimulating pulse (10000 Hz at 120 dB, 20 ms) with random  
831 5-30 sec intervals. In the PPI test, mice were subjected to startle pulse trials (120 dB,  
832 20 ms) or prepulse/pulse trials (20 ms 10000 Hz at 75, 80, or 85 dB with 100 ms  
833 interval before a 20 ms 120dB startle stimulus) with random 5-30 sec intervals  
834 between trials. Different trial types were presented randomly with each trial type  
835 presented 9-12 times, and no two consecutive trials were identical. Max startle  
836 response within 300 ms after onset of startle stimulus was recorded. PPI (%) was  
837 calculated according to the equation:  $[100 - (\text{startle amplitude on prepulse-pulse}$   
838  $\text{trials/startle amplitude on pulse alone trials}) \times 100]$ .

839

840 **Social interaction:** Mice were placed in a square chamber (50 cm × 50 cm × 50 cm)  
841 with two small transparent boxes at two opposite corners. The chamber was dark and  
842 mouse movement was monitored by infrared camera and traced by Anymaze software  
843 (Stoelting, Wood Dale, Illinois). After 5 min habituation in the chamber, mice were  
844 returned to their home cages. Mice were placed into the same chamber 2 hr later, with  
845 one of the boxes holding a stranger mouse that could be seen and smelled through  
846 multiple holes in the box. Social interaction ability of the tested mice was determined  
847 by their traveling distances in the quadrant with the stranger mouse as compared with  
848 the traveling distances in the quadrant with an empty box.

849

850 **Eight-arm radial water maze:** According to the previous report with modification  
851 (*Penley et al., 2013*), animals were trained in eight-arm radial water maze for two  
852 weeks, with four trials each day to search a hidden platform in each trial for escaping  
853 from the water at 20-22 °C. Four hidden platforms were placed at the end of a same  
854 set of arms for all the training and tests, as illustrated in Figure 7-figure supplement  
855 1K. After a trial that mice reached a hidden platform, mice were returned to their  
856 home cages with towel and warming pads. There was a 30-sec gap between trials, and  
857 the visited platform was removed before the next trial. Mice aborted swimming  
858 during training were discarded. Two weeks later, the trained mice were tested for their  
859 working memory capacities that were represented by avoiding arms with visited  
860 platforms in previous trials. In the last trial of the test day, the animals had highest  
861 working memory load for they had to avoid swimming into three arms with platforms  
862 removed. First and repeat entries into any arm that previously had a platform were  
863 counted as working memory errors, and first entries into any arm that never had a  
864 platform were counted as reference memory errors which represent deficits in spatial  
865 recognition or long term memory. The day after test day, all the animals were tested  
866 in a simple visible platform task with 5 trials in a round pool, and each trial contained  
867 a visible platform placed at a different position 0.5-1.0 meter away from tested mice.  
868 The latency of mice reached the visible platform in each trial was averaged to assess  
869 their eyesight.

870

871 **Forced swim and Tail suspension:** In the forced swim test, mice were forced to swim  
872 for 15 min in a cylinder with diameter at 11 cm, water depth at 30 cm and temperature

873 at 22-24 °C. One day later, mice were forced to swim again for 5 min in the same  
874 cylinder and mouse movement was recorded and analyzed by Anymaze software. The  
875 tail suspension test was carried out 2 days later after the forced swim test, in which  
876 mice were suspended by using adhesive tape applied to the tail and videotaped for 5  
877 min. Mouse movement during the 5 min was traced and analyzed by Anymaze  
878 software. For both tests, immobile period was defined by 70% of mouse bodies were  
879 motionless and lasted for at least 1 sec. Summation of immobile periods for each  
880 mouse was taken into statistical analysis.

881

882 **Grid walking test:** Mice were placed on an elevated metal grid panel with each grid  
883 cell  $5 \times 0.8 \text{ cm}^2$ , and their movements were videotaped. The velocity of mouse  
884 movement and percentage of foot-slip steps in total steps were calculated to assess  
885 locomotor function of mice. Scores of foot slips reflect precise stepping, coordination  
886 of the four limbs, and accurate paw placement, indicating ability of animals in  
887 sensorimotor coordination.

888

### 889 **Electrophysiology**

890 Following anesthesia and decapitation, optic nerves were isolated from mice and  
891 superfused with oxygenated artificial cerebrospinal fluid (ACSF) containing (in  
892 mmol/L): 119 NaCl, 2.5 KCl, 2.5 CaCl<sub>2</sub>, 1.3 MgCl<sub>2</sub>, 1.25 NaH<sub>2</sub>PO<sub>4</sub>, 26 NaHCO<sub>3</sub>,  
893 and 10 glucose; pH 7.4. Optic nerve CAP recording methods were adopted and  
894 modified from the previous reports (*Saab et al., 2016*). Briefly, two ends of the optic  
895 nerves were attached by suction electrodes, which backfilled with ACSF and  
896 connected to an IsoFlex (AMPI) for stimulation or a MultiClamp 700B (Molecular

897 Device) for recording. The recorded signal was amplified 50 times, filtered at 30 kHz,  
898 and acquired at 20-30 kHz. Data were collected and analyzed by pClamp 10.3  
899 software (Molecular Devices). The optic nerves were equilibrated for at least 30 min  
900 in the perfusion chamber in normal ACSF at room temperature before experiments.  
901 All experiments were performed at room temperature.

902

903 **Maximal CAP recording:** For each recorded nerve, stimulus pulse (100  $\mu$ s duration)  
904 strength was adjusted with a stepped increase and finally to evoke the maximal CAP.  
905 CAPs were elicited 5 times at every step of the stimulus strength. After reaching the  
906 maximal CAP, the stimulus was increased an additional 25% for supramaximal  
907 stimulation to ensure the activation of all axons in the nerve. Note the supramaximal  
908 stimulation did not further change the CAPs. The areas under CAPs were calculated  
909 to determine the nerve conduction.

910

911 **Oxygen-glucose deprivation (OGD) assay:** The assay was performed as previously  
912 described with modification (*Saab et al., 2016; Trevisiol et al., 2017*). During  
913 experiments, CAPs were evoked by the supramaximal stimulus every 20 sec. After  
914 60-min stimulation of the baseline CAP in normal condition, OGD was induced for  
915 the nerves by switching bathing solution from oxygenated ACSF (saturated with 95%  
916 O<sub>2</sub>/5% CO<sub>2</sub>) to glucose-free ACSF (replaced with equimolar sucrose to maintain  
917 osmolarity) that was saturated with 95% N<sub>2</sub>/5% CO<sub>2</sub>. After 60-min OGD, oxygenated  
918 ACSF was restored and CAPs were recorded for another hour. CAPs recorded after  
919 30-min baseline stimulation was taken as the initial CAPs. The effects of OGD on the



920 nerve conduction and recovery were determined by normalizing the areas of CAPs  
921 recorded during OGD or recovery sessions to that of initial CAPs.

922

923 **Neural activity dependence assay:** The protocol was modified from published  
924 reports (*Saab et al., 2016; Trevisiol et al., 2017*). Before the experiments, CAPs were  
925 recorded every 30 sec to obtain baseline with the stimulus pulse strength set at the  
926 supramaximal levels. To evaluate the conduction of optic nerves under increasing  
927 energy demands, we gradually increased the stimulating frequency from 1 to 100 Hz.  
928 Each stimulating frequency was applied for 30-60 sec. For 1 and 5 Hz stimuli, CAPs  
929 were continuously recorded and CAP areas were measured for each CAP. For 10 to  
930 100 Hz, nerves were stimulated by a train of 100 stimuli, and rest for 1 sec before the  
931 next train of stimuli. CAP areas were sampled for the last four stimuli of each train  
932 and averaged as one data point. For the statistical analysis, CAP areas were  
933 normalized to the initial levels.

934

### 935 **Statistical analysis**

936 Statistical analyses other than for RNA-seq data (described separately above) were  
937 performed using Prism (Graphpad) and presented as mean  $\pm$  s.e.m.. For western  
938 blotting and LFB staining results, statistical analyses were performed after subtraction  
939 of the background intensity and normalization with controls in each batch of  
940 experiments to minimize the influences of batch-to-batch variations. Two-tailed  
941 unpaired Student's *t* test was used for analysis between two groups with one variable,  
942 one-way ANOVA test was used for analysis among three or more groups with one  
943 variable, and two-way ANOVA test was used to determine difference among groups

944 with two variables. Statistical significance was set at  $*P < 0.05$ ,  $**P < 0.01$ ,  $***P <$   
945 0.001.

946

#### 947 **Data Availability**

948 All data generated or analyzed during this study are included in the manuscript and  
949 supporting files. Source data files have been provided for all manuscript figures.

950 Source data have been provided online at [datadryad.org](http://datadryad.org)

951 (<https://doi.org/10.5061/dryad.jq2bvq87c>). The accession number for the RNA-Seq

952 data presented in this article is GEO: GSE123491.

953

954

#### 955 **Acknowledgements**

956 We thank Wanwan He, Kaiwei Zhang, Youguang Yang, and Shasha Zhang in  
957 Hangzhou Normal University for the assistance in EM image analyses, and Dr.

958 Wanhua Shen for the assistance in electrophysiological experiments. We also thank

959 Dr. Woo-Ping Ge in UT Southwestern for comments on the manuscript.

960 This work was supported by grants from National Natural Science Foundation of  
961 China (31371075, 31671070, and 31871030 to YT).

962

963 **Competing interests:** The authors declare no competing interests.

964

## 965 **References**

- 966 Aguirre A, Dupree JL, Mangin JM, and Gallo V. 2007. A functional role for EGFR  
967 signaling in myelination and remyelination. *Nat Neurosci* **10**, 990-1002.  
968 doi:10.1038/nn1938
- 969 Bergles DE, and Richardson WD. 2015. Oligodendrocyte Development and Plasticity.  
970 *Cold Spring Harb Perspect Biol* **8**, a020453. doi:10.1101/cshperspect.a020453
- 971 Bradl M, and Lassmann H. 2010. Oligodendrocytes: biology and pathology. *Acta*  
972 *Neuropathol* **119**, 37-53. doi:10.1007/s00401-009-0601-5
- 973 Brinkmann BG, Agarwal A, Sereda MW, Garratt AN, Muller T, Wende H, Stassart  
974 RM, Nawaz S, Humml C, Velanac V, Radyushkin K, Goebbels S, Fischer TM,  
975 Franklin RJ, Lai C, Ehrenreich H, Birchmeier C, Schwab MH, and Nave KA. 2008.  
976 Neuregulin-1/ErbB signaling serves distinct functions in myelination of the peripheral  
977 and central nervous system. *Neuron* **59**, 581-595. doi:10.1016/j.neuron.2008.06.028
- 978 Cai Z, Jitkaew S, Zhao J, Chiang HC, Choksi S, Liu J, Ward Y, Wu LG, and Liu ZG.  
979 2014. Plasma membrane translocation of trimerized MLKL protein is required for  
980 TNF-induced necroptosis. *Nat Cell Biol* **16**, 55-65. doi:10.1038/ncb2883
- 981 Chen J, He W, Hu X, Shen Y, Cao J, Wei Z, Luan Y, He L, Jiang F, and Tao Y. 2017. A  
982 role for ErbB signaling in the induction of reactive astrogliosis. *Cell Discov* **3**, 17044.  
983 doi:10.1038/celldisc.2017.44
- 984 Chong VZ, Thompson M, Beltaifa S, Webster MJ, Law AJ, and Weickert CS. 2008.  
985 Elevated neuregulin-1 and ErbB4 protein in the prefrontal cortex of schizophrenic  
986 patients. *Schizophrenia research* **100**, 270-280. doi:10.1016/j.schres.2007.12.474
- 987 Czopka T, Ffrench-Constant C, and Lyons DA. 2013. Individual oligodendrocytes  
988 have only a few hours in which to generate new myelin sheaths in vivo. *Dev Cell* **25**,  
989 599-609. doi:10.1016/j.devcel.2013.05.013
- 990 Douaud G, Smith S, Jenkinson M, Behrens T, Johansen-Berg H, Vickers J, James S,  
991 Voets N, Watkins K, Matthews PM, and James A. 2007. Anatomically related grey  
992 and white matter abnormalities in adolescent-onset schizophrenia. *Brain* **130**, 2375-  
993 2386. doi:10.1093/brain/awm184
- 994 Fancy SP, Baranzini SE, Zhao C, Yuk DI, Irvine KA, Kaing S, Sanai N, Franklin RJ,  
995 and Rowitch DH. 2009. Dysregulation of the Wnt pathway inhibits timely  
996 myelination and remyelination in the mammalian CNS. *Genes Dev* **23**, 1571-1585.  
997 doi:10.1101/gad.1806309
- 998 Fields RD. 2008. White matter in learning, cognition and psychiatric disorders. *Trends*

- 999 *Neurosci* **31**, 361-370.
- 1000 Fu H, Cai J, Clevers H, Fast E, Gray S, Greenberg R, Jain MK, Ma Q, Qiu M,  
1001 Rowitch DH, Taylor CM, and Stiles CD. 2009. A genome-wide screen for spatially  
1002 restricted expression patterns identifies transcription factors that regulate glial  
1003 development. *J Neurosci* **29**, 11399-11408. doi:10.1523/JNEUROSCI.0160-09.2009
- 1004 Funfschilling U, Supplie LM, Mahad D, Boretius S, Saab AS, Edgar J, Brinkmann  
1005 BG, Kassmann CM, Tzvetanova ID, Mobius W, Diaz F, Meijer D, Suter U,  
1006 Hamprecht B, Sereda MW, Moraes CT, Frahm J, Goebbels S, and Nave KA. 2012.  
1007 Glycolytic oligodendrocytes maintain myelin and long-term axonal integrity. *Nature*  
1008 **485**, 517-521. doi:10.1038/nature11007
- 1009 Futamura T, Toyooka K, Iritani S, Niizato K, Nakamura R, Tsuchiya K, Someya T,  
1010 Kakita A, Takahashi H, and Nawa H. 2002. Abnormal expression of epidermal growth  
1011 factor and its receptor in the forebrain and serum of schizophrenic patients. *Mol*  
1012 *Psychiatry* **7**, 673-682. doi:10.1038/sj.mp.4001081
- 1013 Guo F, Ma J, McCauley E, Bannerman P, and Pleasure D. 2009. Early postnatal  
1014 proteolipid promoter-expressing progenitors produce multilineage cells in vivo. *J*  
1015 *Neurosci* **29**, 7256-7270. doi:10.1523/JNEUROSCI.5653-08.2009
- 1016 Hahn CG, Wang HY, Cho DS, Talbot K, Gur RE, Berrettini WH, Bakshi K, Kamins J,  
1017 Borgmann-Winter KE, Siegel SJ, Gallop RJ, and Arnold SE. 2006. Altered neuregulin  
1018 1-erbB4 signaling contributes to NMDA receptor hypofunction in schizophrenia. *Nat*  
1019 *Med* **12**, 824-828. doi:10.1038/nm1418
- 1020 Hall J, Whalley HC, Job DE, Baig BJ, McIntosh AM, Evans KL, Thomson PA,  
1021 Porteous DJ, Cunningham-Owens DG, Johnstone EC, and Lawrie SM. 2006. A  
1022 neuregulin 1 variant associated with abnormal cortical function and psychotic  
1023 symptoms. *Nat Neurosci* **9**, 1477-1478. doi:10.1038/nn1795
- 1024 Harrington EP, Zhao C, Fancy SP, Kaing S, Franklin RJ, and Rowitch DH. 2010.  
1025 Oligodendrocyte PTEN is required for myelin and axonal integrity, not remyelination.  
1026 *Ann Neurol* **68**, 703-716. doi:10.1002/ana.22090
- 1027 Harrison PJ, and Law AJ. 2006. Neuregulin 1 and schizophrenia: genetics, gene  
1028 expression, and neurobiology. *Biol Psychiatry* **60**, 132-140.  
1029 doi:10.1016/j.biopsych.2005.11.002
- 1030 Hof PR, and Schmitz C. 2009. The quantitative neuropathology of schizophrenia.  
1031 *Acta Neuropathol* **117**, 345-346. doi:10.1007/s00401-009-0495-2
- 1032 Hoistad M, Segal D, Takahashi N, Sakurai T, Buxbaum JD, and Hof PR. 2009.

- 1033 Linking white and grey matter in schizophrenia: oligodendrocyte and neuron  
1034 pathology in the prefrontal cortex. *Front Neuroanat* **3**, 9.  
1035 doi:10.3389/neuro.05.009.2009
- 1036 Hughes EG, Orthmann-Murphy JL, Langseth AJ, and Bergles DE. 2018. Myelin  
1037 remodeling through experience-dependent oligodendrogenesis in the adult  
1038 somatosensory cortex. *Nat Neurosci* **21**, 696-706. doi:10.1038/s41593-018-0121-5
- 1039 Inamura N, Sugio S, Macklin WB, Tomita K, Tanaka KF, and Ikenaka K. 2012. Gene  
1040 induction in mature oligodendrocytes with a PLP-tTA mouse line. *Genesis* **50**, 424-  
1041 428. doi:10.1002/dvg.20808
- 1042 Ishii A, Furusho M, Dupree JL, and Bansal R. 2016. Strength of ERK1/2 MAPK  
1043 Activation Determines Its Effect on Myelin and Axonal Integrity in the Adult CNS. *J*  
1044 *Neurosci* **36**, 6471-6487. doi:10.1523/JNEUROSCI.0299-16.2016
- 1045 Iwakura Y, and Nawa H. 2013. ErbB1-4-dependent EGF/neuregulin signals and their  
1046 cross talk in the central nervous system: pathological implications in schizophrenia  
1047 and Parkinson's disease. *Front Cell Neurosci* **7**, 4. doi:10.3389/fncel.2013.00004
- 1048 Joshi D, Fullerton JM, and Weickert CS. 2014. Elevated ErbB4 mRNA is related to  
1049 interneuron deficit in prefrontal cortex in schizophrenia. *Journal of psychiatric*  
1050 *research* **53**, 125-132. doi:10.1016/j.jpsychires.2014.02.014
- 1051 Karlsgodt KH. 2020. White Matter Microstructure across the Psychosis Spectrum.  
1052 *Trends Neurosci*. doi:10.1016/j.tins.2020.03.014
- 1053 Kelly S, Jahanshad N, Zalesky A, Kochunov P, Agartz I, Alloza C, Andreassen OA,  
1054 Arango C, Banaj N, Bouix S, Bousman CA, Brouwer RM, Bruggemann J, Bustillo J,  
1055 Cahn W, Calhoun V, Cannon D, Carr V, Catts S, Chen J, et al. 2018. Widespread white  
1056 matter microstructural differences in schizophrenia across 4322 individuals: results  
1057 from the ENIGMA Schizophrenia DTI Working Group. *Mol Psychiatry* **23**, 1261-  
1058 1269. doi:10.1038/mp.2017.170
- 1059 Kessler RC, Amminger GP, Aguilar-Gaxiola S, Alonso J, Lee S, and Ustun TB. 2007.  
1060 Age of onset of mental disorders: a review of recent literature. *Current opinion in*  
1061 *psychiatry* **20**, 359-364. doi:10.1097/YCO.0b013e32816ebc8c
- 1062 Kougioumtzidou E, Shimizu T, Hamilton NB, Tohyama K, Sprengel R, Monyer H,  
1063 Attwell D, and Richardson WD. 2017. Signalling through AMPA receptors on  
1064 oligodendrocyte precursors promotes myelination by enhancing oligodendrocyte  
1065 survival. *Elife* **6**. doi:10.7554/eLife.28080
- 1066 Kujala P, Portin R, and Ruutinen J. 1997. The progress of cognitive decline in

- 1067 multiple sclerosis. A controlled 3-year follow-up. *Brain* **120 ( Pt 2)**, 289-297.
- 1068 Law AJ, Lipska BK, Weickert CS, Hyde TM, Straub RE, Hashimoto R, Harrison PJ,  
1069 Kleinman JE, and Weinberger DR. 2006. Neuregulin 1 transcripts are differentially  
1070 expressed in schizophrenia and regulated by 5' SNPs associated with the disease.  
1071 *Proceedings of the National Academy of Sciences of the United States of America* **103**,  
1072 6747-6752. doi:10.1073/pnas.0602002103
- 1073 Law AJ, Wang Y, Sei Y, O'Donnell P, Piantadosi P, Papaleo F, Straub RE, Huang W,  
1074 Thomas CJ, Vakkalanka R, Besterman AD, Lipska BK, Hyde TM, Harrison PJ,  
1075 Kleinman JE, and Weinberger DR. 2012. Neuregulin 1-ErbB4-PI3K signaling in  
1076 schizophrenia and phosphoinositide 3-kinase-p110delta inhibition as a potential  
1077 therapeutic strategy. *Proc Natl Acad Sci U S A* **109**, 12165-12170.  
1078 doi:10.1073/pnas.1206118109
- 1079 Ludwig A, Schlierf B, Schardt A, Nave KA, and Wegner M. 2004. Sox10-rtTA mouse  
1080 line for tetracycline-inducible expression of transgenes in neural crest cells and  
1081 oligodendrocytes. *Genesis* **40**, 171-175. doi:10.1002/gene.20083
- 1082 Luo X, He W, Hu X, and Yan R. 2014. Reversible overexpression of bace1-cleaved  
1083 neuregulin-1 N-terminal fragment induces schizophrenia-like phenotypes in mice.  
1084 *Biol Psychiatry* **76**, 120-127. doi:10.1016/j.biopsych.2013.09.026
- 1085 Makinodan M, Rosen KM, Ito S, and Corfas G. 2012. A critical period for social  
1086 experience-dependent oligodendrocyte maturation and myelination. *Science* **337**,  
1087 1357-1360. doi:10.1126/science.1220845
- 1088 McIntosh AM, Moorhead TW, Job D, Lymer GK, Munoz Maniega S, McKirdy J,  
1089 Sussmann JE, Baig BJ, Bastin ME, Porteous D, Evans KL, Johnstone EC, Lawrie SM,  
1090 and Hall J. 2008. The effects of a neuregulin 1 variant on white matter density and  
1091 integrity. *Mol Psychiatry* **13**, 1054-1059. doi:10.1038/sj.mp.4002103
- 1092 Mei L, and Nave KA. 2014. Neuregulin-ERBB signaling in the nervous system and  
1093 neuropsychiatric diseases. *Neuron* **83**, 27-49. doi:10.1016/j.neuron.2014.06.007
- 1094 Nave KA, and Salzer JL. 2006. Axonal regulation of myelination by neuregulin 1.  
1095 *Curr Opin Neurobiol* **16**, 492-500.
- 1096 Nave KA, and Werner HB. 2014. Myelination of the nervous system: mechanisms and  
1097 functions. *Annu Rev Cell Dev Biol* **30**, 503-533. doi:10.1146/annurev-cellbio-100913-  
1098 013101
- 1099 Oberst A, Dillon CP, Weinlich R, McCormick LL, Fitzgerald P, Pop C, Hakem R,  
1100 Salvesen GS, and Green DR. 2011. Catalytic activity of the caspase-8-FLIP(L)

1101 complex inhibits RIPK3-dependent necrosis. *Nature* **471**, 363-367.  
1102 doi:10.1038/nature09852

1103 Ofengeim D, Ito Y, Najafov A, Zhang Y, Shan B, DeWitt JP, Ye J, Zhang X, Chang A,  
1104 Vakifahmetoglu-Norberg H, Geng J, Py B, Zhou W, Amin P, Berlink Lima J, Qi C, Yu  
1105 Q, Trapp B, and Yuan J. 2015. Activation of necroptosis in multiple sclerosis. *Cell*  
1106 *Rep* **10**, 1836-1849. doi:10.1016/j.celrep.2015.02.051

1107 Palazuelos J, Crawford HC, Klingener M, Sun B, Karelis J, Raines EW, and Aguirre  
1108 A. 2014. TACE/ADAM17 is essential for oligodendrocyte development and CNS  
1109 myelination. *J Neurosci* **34**, 11884-11896. doi:10.1523/JNEUROSCI.1220-14.2014

1110 Penley SC, Gaudet CM, and Threlkeld SW. 2013. Use of an eight-arm radial water  
1111 maze to assess working and reference memory following neonatal brain injury. *J Vis*  
1112 *Exp*, 50940. doi:10.3791/50940

1113 Peters BD, and Karlsgodt KH. 2015. White matter development in the early stages of  
1114 psychosis. *Schizophr Res* **161**, 61-69. doi:10.1016/j.schres.2014.05.021

1115 Roy K, Murtie JC, El-Khodori BF, Edgar N, Sardi SP, Hooks BM, Benoit-Marand M,  
1116 Chen C, Moore H, O'Donnell P, Brunner D, and Corfas G. 2007. Loss of erbB  
1117 signaling in oligodendrocytes alters myelin and dopaminergic function, a potential  
1118 mechanism for neuropsychiatric disorders. *Proc Natl Acad Sci U S A* **104**, 8131-8136.

1119 Saab AS, Tzvetavona ID, Trevisiol A, Baltan S, Dibaj P, Kusch K, Mobius W, Goetze  
1120 B, Jahn HM, Huang W, Steffens H, Schomburg ED, Perez-Samartin A, Perez-Cerda F,  
1121 Bakhtiari D, Matute C, Lowel S, Griesinger C, Hirrlinger J, Kirchhoff F, et al. 2016.  
1122 Oligodendroglial NMDA Receptors Regulate Glucose Import and Axonal Energy  
1123 Metabolism. *Neuron* **91**, 119-132. doi:10.1016/j.neuron.2016.05.016

1124 Schaeren-Wiemers N, and Gerfin-Moser AJH. 1993. A single protocol to detect  
1125 transcripts of various types and expression levels in neural tissue and cultured cells: in  
1126 situ hybridization using digoxigenin-labelled cRNA probes. *Histochemistry* **100**, 431-  
1127 440. doi:10.1007/bf00267823

1128 Schmucker J, Ader M, Brockschneider D, Brodarac A, Bartsch U, and Riethmacher D.  
1129 2003. erbB3 is dispensable for oligodendrocyte development in vitro and in vivo. *Glia*  
1130 **44**, 67-75.

1131 Sun L, Wang H, Wang Z, He S, Chen S, Liao D, Wang L, Yan J, Liu W, Lei X, and  
1132 Wang X. 2012. Mixed lineage kinase domain-like protein mediates necrosis signaling  
1133 downstream of RIP3 kinase. *Cell* **148**, 213-227. doi:10.1016/j.cell.2011.11.031

1134 Taveggia C, Thaker P, Petrylak A, Caporaso GL, Toews A, Falls DL, Einheber S, and

- 1135 Salzer JL. 2008. Type III neuregulin-1 promotes oligodendrocyte myelination. *Glia*  
1136 **56**, 284-293.
- 1137 Ting AK, Chen Y, Wen L, Yin DM, Shen C, Tao Y, Liu X, Xiong WC, and Mei L.  
1138 2011. Neuregulin 1 promotes excitatory synapse development and function in  
1139 GABAergic interneurons. *J Neurosci* **31**, 15-25. doi:10.1523/JNEUROSCI.2538-  
1140 10.2011
- 1141 Trevisiol A, Saab AS, Winkler U, Marx G, Imamura H, Mobius W, Kusch K, Nave  
1142 KA, and Hirrlinger J. 2017. Monitoring ATP dynamics in electrically active white  
1143 matter tracts. *Elife* **6**. doi:10.7554/eLife.24241
- 1144 Tripathi RB, Jackiewicz M, McKenzie IA, Kougioumtzidou E, Grist M, and  
1145 Richardson WD. 2017. Remarkable Stability of Myelinating Oligodendrocytes in  
1146 Mice. *Cell Rep* **21**, 316-323. doi:10.1016/j.celrep.2017.09.050
- 1147 Uranova NA, Vikhрева OV, Rachmanova VI, and Orlovskaya DD. 2011.  
1148 Ultrastructural alterations of myelinated fibers and oligodendrocytes in the prefrontal  
1149 cortex in schizophrenia: a postmortem morphometric study. *Schizophr Res Treatment*  
1150 **2011**, 325789. doi:10.1155/2011/325789
- 1151 Uranova NA, Vostrikov VM, Vikhрева OV, Zimina IS, Kolomeets NS, and  
1152 Orlovskaya DD. 2007. The role of oligodendrocyte pathology in schizophrenia. *Int J*  
1153 *Neuropsychopharmacol* **10**, 537-545. doi:10.1017/S1461145707007626
- 1154 Watkins TA, Emery B, Mulinyawe S, and Barres BA. 2008. Distinct stages of  
1155 myelination regulated by gamma-secretase and astrocytes in a rapidly myelinating  
1156 CNS coculture system. *Neuron* **60**, 555-569. doi:10.1016/j.neuron.2008.09.011
- 1157 Wegener A, Deboux C, Bachelin C, Frah M, Kerninon C, Seilhean D, Weider M,  
1158 Wegner M, and Nait-Oumesmar B. 2015. Gain of Olig2 function in oligodendrocyte  
1159 progenitors promotes remyelination. *Brain* **138**, 120-135. doi:10.1093/brain/awu375
- 1160 Winterer G, Konrad A, Vucurevic G, Musso F, Stoeter P, and Dahmen N. 2008.  
1161 Association of 5' end neuregulin-1 (NRG1) gene variation with subcortical medial  
1162 frontal microstructure in humans. *Neuroimage* **40**, 712-718.  
1163 doi:10.1016/j.neuroimage.2007.12.041
- 1164 Woo RS, Li XM, Tao Y, Carpenter-Hyland E, Huang YZ, Weber J, Neiswender H,  
1165 Dong XP, Wu J, Gassmann M, Lai C, Xiong WC, Gao TM, and Mei L. 2007.  
1166 Neuregulin-1 enhances depolarization-induced GABA release. *Neuron* **54**, 599-610.  
1167 doi:10.1016/j.neuron.2007.04.009
- 1168 Xiao L, Ohayon D, McKenzie IA, Sinclair-Wilson A, Wright JL, Fudge AD, Emery B,



1169 Li H, and Richardson WD. 2016. Rapid production of new oligodendrocytes is  
1170 required in the earliest stages of motor-skill learning. *Nat Neurosci* **19**, 1210-1217.  
1171 doi:10.1038/nn.4351

1172 Ye F, Chen Y, Hoang T, Montgomery RL, Zhao XH, Bu H, Hu T, Taketo MM, van Es  
1173 JH, Clevers H, Hsieh J, Bassel-Duby R, Olson EN, and Lu QR. 2009. HDAC1 and  
1174 HDAC2 regulate oligodendrocyte differentiation by disrupting the beta-catenin-TCF  
1175 interaction. *Nat Neurosci* **12**, 829-838. doi:10.1038/nn.2333

1176 Ying Z, Pan C, Shao T, Liu L, Li L, Guo D, Zhang S, Yuan T, Cao R, Jiang Z, Chen S,  
1177 Wang F, and Wang X. 2018. Mixed Lineage Kinase Domain-like Protein MLKL  
1178 Breaks Down Myelin following Nerve Injury. *Mol Cell* **72**, 457-468 e455.  
1179 doi:10.1016/j.molcel.2018.09.011

1180 Zhang Y, Chen K, Sloan SA, Bennett ML, Scholze AR, O'Keefe S, Phatnani HP,  
1181 Guarnieri P, Caneda C, Ruderisch N, Deng S, Liddelow SA, Zhang C, Daneman R,  
1182 Maniatis T, Barres BA, and Wu JQ. 2014. An RNA-sequencing transcriptome and  
1183 splicing database of glia, neurons, and vascular cells of the cerebral cortex. *J Neurosci*  
1184 **34**, 11929-11947. doi:10.1523/JNEUROSCI.1860-14.2014

1185 Zuliani R, Moorhead TW, Bastin ME, Johnstone EC, Lawrie SM, Brambilla P,  
1186 O'Donovan MC, Owen MJ, Hall J, and McIntosh AM. 2011. Genetic variants in the  
1187 ErbB4 gene are associated with white matter integrity. *Psychiatry research* **191**, 133-  
1188 137. doi:10.1016/j.psychresns.2010.11.001

1189  
1190

1191 **Figure Legends:**

1192 **Figure 1.** ErbB overactivation in OLs induces demyelination in *Plp*-ErbB2<sup>V664E</sup> (PB)  
1193 mice but hypomyelination in *Sox10*-ErbB2<sup>V664E</sup> (SB) mice. (A and L) Dox treatment  
1194 setting for indicated mice and littermate controls. (B and M) Walking speed and  
1195 percentage of foot slips of *Plp*-ErbB2<sup>V664E</sup> mice and littermate controls (Ctrl) at P35  
1196 with 14 dpd, or *Sox10*-ErbB2<sup>V664E</sup> mice and littermate controls at 9 dwd, in the grid  
1197 walking test. Data were presented as mean  $\pm$  s.e.m., and analyzed by two-tailed  
1198 unpaired *t* test.  $n = 4$  mice for each group. In B, for velocity,  $t_{(6)} = 3.773$ ,  $P = 0.0093$ ;  
1199 For foot slips,  $t_{(6)} = 12.31$ ,  $P < 0.0001$ . In M, for velocity,  $t_{(6)} = 3.504$ ,  $P = 0.0128$ ; For  
1200 foot slips,  $t_{(6)} = 4.429$ ,  $P = 0.0044$ . (C and N) Western blotting of indicated proteins in  
1201 white matter tissues isolated from *Plp*-ErbB2<sup>V664E</sup> mice, or *Sox10*-ErbB2<sup>V664E</sup> mice, in  
1202 comparison with that from littermate control mice. Activation status of each ErbB  
1203 receptor was examined by western blotting with the specific antibody against its  
1204 phosphorylated form. (D and O) Quantitative data of western blotting results were  
1205 presented as mean  $\pm$  s.e.m., and analyzed by two-tailed unpaired *t* test. In D, for  
1206 EGFR,  $t_{(4)} = 27.64$ ,  $P < 0.0001$ ; for ErbB3,  $t_{(4)} = 19.98$ ,  $P < 0.0001$ ; for ErbB4,  $t_{(4)} =$   
1207  $10.06$ ,  $P = 0.0005$ . In O, for EGFR,  $t_{(4)} = 0.1983$ ,  $P = 0.852$ ; for ErbB3,  $t_{(4)} = 28.34$ ,  $P$   
1208  $< 0.0001$ ; for ErbB4,  $t_{(4)} = 9.181$ ,  $P = 0.00078$ ; for MBP,  $t_{(4)} = 48.82$ ,  $P < 0.0001$ . (E  
1209 and P) LFB staining results of coronal sections through the genu of the corpus  
1210 callosum in *Plp*-ErbB2<sup>V664E</sup> and littermate control mice, or in *Sox10*-ErbB2<sup>V664E</sup> and  
1211 littermate control mice. Black arrows indicate the lower staining intensity of myelin  
1212 stained in the corpus callosum. (F and Q) Quantitative data for LFB staining intensity  
1213 in the corpus callosum of indicated mice. Data were presented as mean  $\pm$  s.e.m. and  
1214 analyzed by two-tailed unpaired *t* test. In F, for the middle part at 9 dpd,  $t_{(6)} = 6.345$ ,  $P$   
1215  $= 0.00072$ ; for the lateral part at 9 dpd,  $t_{(6)} = 3.914$ ,  $P = 0.0079$ ; for the middle part at

1216 14 dpd,  $t_{(6)} = 9.89$ ,  $P < 0.0001$ ; for the lateral part at 14 dpd,  $t_{(6)} = 23.07$ ,  $P < 0.0001$ .  
1217 In Q, for the middle part,  $t_{(6)} = 15.17$ ,  $P < 0.0001$ ; for the lateral part,  $t_{(6)} = 10.23$ ,  $P <$   
1218  $0.0001$ . (G) Western blotting results of MBP and ErbB2 in the cortex (CX) and the  
1219 cerebellum (CE) isolated from *Plp-ErbB2*<sup>V664E</sup> and littermate control mice at 14 dpd.  
1220 GAPDH served as loading control. Quantitative data were presented as mean  $\pm$  s.e.m.,  
1221 and analyzed by two-tailed unpaired  $t$  test. For CE,  $t_{(4)} = 6.35$ ,  $P = 0.0032$ ; for CX,  $t_{(4)}$   
1222  $= 9.243$ ,  $P = 0.00076$ . (H and R) The densities of myelinated axons examined by EM  
1223 in different brain regions of *Plp-ErbB2*<sup>V664E</sup> and littermate control mice at 14 dpd, or  
1224 *Sox10-ErbB2*<sup>V664E</sup> and littermate control mice at 9 dwd, were quantified. The  
1225 percentages of axons with myelin breakdown were also quantified for *Plp-ErbB2*<sup>V664E</sup>  
1226 mice (H). CC, the corpus callosum; ON, the optic nerve; PFC, the prefrontal cortex.  
1227 Data were presented as mean  $\pm$  s.e.m., and analyzed by two-tailed unpaired  $t$  test. In H,  
1228 for myelinated-axon density, in CC,  $t_{(4)} = 2.863$ ,  $P = 0.046$ ; in ON,  $t_{(4)} = 1.818$ ,  $P =$   
1229  $0.143$ . For the percentage of axons with myelin breakdown, in CC,  $t_{(4)} = 29.32$ ,  $P <$   
1230  $0.0001$ ; in ON,  $t_{(4)} = 6.108$ ,  $P = 0.0036$ ; in PFC,  $t_{(4)} = 8.125$ ,  $P = 0.0012$ . In R, for  
1231 myelinated-axon density, in CC,  $t_{(4)} = 0.2773$ ,  $P = 0.795$ ; in ON,  $t_{(4)} = 0.1455$ ,  $P =$   
1232  $0.891$ . (I and S) EM images of the corpus callosum (CC), optic nerve (ON), and  
1233 prefrontal cortex (PFC) from *Plp-ErbB2*<sup>V664E</sup> and littermate controls at 14 dpd, or  
1234 from *Sox10-ErbB2*<sup>V664E</sup> and littermate control mice at 9 dwd. Red arrow indicates the  
1235 axon with myelin breakdown. Quantitative data were shown for g-ratio analysis of  
1236 myelinated axons detected by EM. Averaged g-ratio for each mouse were plotted as  
1237 inset, presented as mean  $\pm$  s.e.m., and analyzed by two-tailed unpaired  $t$  test. In I, for  
1238 CC,  $t_{(4)} = 3.412$ ,  $P = 0.027$ ; for ON,  $t_{(4)} = 3.083$ ,  $P = 0.037$ ; for PFC,  $t_{(4)} = 7.11$ ,  $P =$   
1239  $0.0021$ . In S, for CC,  $t_{(4)} = 3.295$ ,  $P = 0.03$ ; for ON,  $t_{(4)} = 3.775$ ,  $P = 0.0195$ ; for PFC,  
1240  $t_{(4)} = 1.196$ ,  $P = 0.298$ . (J, K, T, U) Astrocytes (GFAP<sup>+</sup>) and microglia (Iba1<sup>+</sup>)

1241 examined in the subcortical white matter of indicated mice by immunostaining. Cell  
1242 densities in the corpus callosum were quantified, and data were presented as mean  $\pm$   
1243 s.e.m., and analyzed by two-tailed unpaired  $t$  test. In J,  $t_{(10)} = 4.753$ ,  $P = 0.0008$ . In K,  
1244  $t_{(4)} = 36.4$ ,  $P < 0.0001$ . In T,  $t_{(4)} = 0.0501$ ,  $P = 0.962$ . In U,  $t_{(4)} = 1.637$ ,  $P = 0.177$ .

1245

1246 **Figure 1-figure supplement 1.** Expression of ErbB receptor members in white matter  
1247 regions at different postnatal days. (A) Western blotting results of ErbB receptors in  
1248 white matter regions isolated from wild type mice at different postnatal days. ns, non-  
1249 specific band. (B) Quantitative data of the western blotting results were presented as  
1250 mean  $\pm$  s.e.m..  $n = 3$  independent experiments for each postnatal day. Data were  
1251 normalized to P5 in each batch of experiments.

1252

1253 **Figure 1-figure supplement 2.** Unaltered myelin in the brains of *Plp-tTA* and  
1254 *Sox10<sup>+rtTA</sup>* mice, but hypermyelination at 9 dpd and axonal pathology at 14 dpd in  
1255 *Plp-ErbB2<sup>V664E</sup>* mice. (A) Representative EM images showed that myelin sheath  
1256 ruptured and broke down in *Plp-ErbB2<sup>V664E</sup>* mice at 14 dpd (red arrow). Note the  
1257 associated nuclei (red asterisk) showed no chromatin condensation and nucleation. (B)  
1258 Dramatically reduced axons in the subcortical white matter of *Plp-ErbB2<sup>V664E</sup>* mice at  
1259 14 dpd. Sagittal sections of *Plp-ErbB2<sup>V664E</sup>* (PB) and littermate control mice (Ctrl)  
1260 were immunostained by monoclonal antibody TuJ1. Quantitative data were presented  
1261 as mean  $\pm$  s.e.m., and analyzed by two-tailed unpaired  $t$  test.  $t_{(6)} = 6.019$ ,  $P = 0.0009$ .  
1262 (C) EM images of the corpus callosum (CC) of *Plp-tTA* and littermate *TRE-*  
1263 *ErbB2<sup>V664E</sup>* mice at P35 with 14 dpd. g-ratio was calculated for myelinated axons.  
1264 Averaged g-ratio (inset) were presented as mean  $\pm$  s.e.m., and analyzed by two-tailed

1265 unpaired  $t$  test.  $t_{(4)} = 0.4472$ ,  $P = 0.678$ . **(D)** EM examination of axons in the midline  
1266 of corpus callosum in *Plp-ErbB2*<sup>V664E</sup> mice at 9 dpd. Note most axons remained intact  
1267 despite that there were a few axons had myelin breakdown (red arrow).  $g$ -ratio was  
1268 calculated for myelinated axons and averaged  $g$ -ratio for each mouse were analyzed  
1269 by two-tailed unpaired  $t$  test (inset).  $t_{(4)} = 3.226$ ,  $P = 0.0321$ . **(E)** The densities of  
1270 myelinated axons as well as the percentages of axons with myelin breakdown in EM  
1271 analysis of the midline of corpus callosum in *Plp-ErbB2*<sup>V664E</sup> mice (PB) and littermate  
1272 controls (Ctrl) at 9 dpd. Data were presented as mean  $\pm$  s.e.m., and analyzed by two-  
1273 tailed unpaired  $t$  test. For myelinated-axon density,  $t_{(4)} = 0.805$ ,  $P = 0.466$ . For axons  
1274 with myelin breakdown,  $t_{(4)} = 3.567$ ,  $P = 0.023$ . **(F)** EM images of the corpus  
1275 callosum of *Sox10*<sup>+/ $\tau$ TA</sup> and littermate *TRE-ErbB2*<sup>V664E</sup> mice at P30 with 9 dwd.  $g$ -  
1276 ratio was calculated for myelinated axons. Averaged  $g$ -ratio (inset) were presented as  
1277 mean  $\pm$  s.e.m., and analyzed by two-tailed unpaired  $t$  test.  $t_{(4)} = 0.3042$ ,  $P = 0.776$ .

1278

1279

1280 **Figure 2.** *Plp*-tTA targets MOs whereas *Sox10*<sup>+/ $\tau$ TA</sup> targets OPC-NFOs in mouse  
1281 brains in late postnatal development. **(A)** Schematic illustration of stereotactic  
1282 injection sites of AAV-*TRE*-YFP. **(B and C)** The percentage of Olig2<sup>+</sup>YFP<sup>+</sup>,  
1283 CC1<sup>+</sup>YFP<sup>+</sup>, or PDGFR $\alpha$ <sup>+</sup>YFP<sup>+</sup> (NG2<sup>+</sup>YFP<sup>+</sup>) cells in YFP<sup>+</sup> cells for indicated mice 1  
1284 (AAV-1d) or 2 days (AAV-2d) after AAV-*TRE*-YFP injection at P14 (B) or P35 (C).  
1285 Data were from repeated immunostaining results of 3-7 mice for each group,  
1286 presented as mean  $\pm$  s.e.m., and analyzed by two-tailed unpaired  $t$  test. For *Plp*-tTA at  
1287 P14 from AAV-1d to AAV-2d: Olig2<sup>+</sup>YFP<sup>+</sup> cells,  $t_{(12)} = 0.3698$ ,  $P = 0.718$ ;  
1288 CC1<sup>+</sup>YFP<sup>+</sup> cells,  $t_{(13)} = 0.5666$ ,  $P = 0.581$ ; PDGFR $\alpha$ <sup>+</sup>YFP<sup>+</sup> cells,  $t_{(10)} = 7.532$ ,  $P <$

1289 0.0001. For *Sox10*<sup>+rtTA</sup> at P14 from AAV-1d to AAV-2d: Olig2<sup>+</sup>YFP<sup>+</sup> cells,  $t_{(13)} =$   
1290 0.2055,  $P = 0.840$ ; CC1<sup>+</sup>YFP<sup>+</sup> cells,  $t_{(8)} = 0.6425$ ,  $P = 0.539$ ; PDGFR $\alpha$ <sup>+</sup>YFP<sup>+</sup> cells,  $t_{(5)}$   
1291  $= 1.021$ ,  $P = 0.354$ . For *Plp*-tTA at P35 from AAV-1d to AAV-2d: Olig2<sup>+</sup>YFP<sup>+</sup> cells,  
1292  $t_{(17)} = 0.4959$ ,  $P = 0.626$ ; CC1<sup>+</sup>YFP<sup>+</sup> cells,  $t_{(9)} = 2.32$ ,  $P = 0.046$ ; NG2<sup>+</sup>YFP<sup>+</sup> cells,  $t_{(18)}$   
1293  $= 1.003$ ,  $P = 0.329$ . For *Sox10*<sup>+rtTA</sup> at P35 from AAV-1d to AAV-2d: Olig2<sup>+</sup>YFP<sup>+</sup>  
1294 cells,  $t_{(11)} = 1.098$ ,  $P = 0.296$ ; CC1<sup>+</sup>YFP<sup>+</sup> cells,  $t_{(23)} = 0.8614$ ,  $P = 0.398$ ; NG2<sup>+</sup>YFP<sup>+</sup>  
1295 cells,  $t_{(26)} = 7.869$ ,  $P < 0.0001$ . **(D)** Immunostaining revealed that TCF4 was  
1296 specifically expressed in a small fraction of Olig2<sup>+</sup> cells, but not in PDGFR $\alpha$ <sup>+</sup> cells, in  
1297 the corpus callosum of mice at P30. Solid arrow, the representative double positive  
1298 cell; Open arrow, the representative cell positive for TCF4 only. **(E and F)** Double  
1299 immunostaining results of TCF4 and YFP for brain slices from indicated mice 1  
1300 (AAV-1d) or 2 days (AAV-2d) after virus injection at P14 (E) or P35 (F). Note that  
1301 TCF4<sup>+</sup> nuclei in AAV-infected area were almost all localized in YFP<sup>+</sup> cells in  
1302 *Sox10*<sup>+rtTA</sup> mice 1 day after virus injection (AAV-1d) at either P14 or P35, and the  
1303 colocalization reduced after 1 more day (AAV-2d). Solid arrows, representative  
1304 double positive cells; Open arrows, representative cells positive for TCF4 only. **(G**  
1305 **and H)** The percentage of TCF4<sup>+</sup>YFP<sup>+</sup> in YFP<sup>+</sup> cells (G), and the density of  
1306 TCF4<sup>+</sup>YFP<sup>+</sup> cells (H), were analyzed. Data were from repeated immunostaining  
1307 results of 3-7 mice for each group, presented as mean  $\pm$  s.e.m., and analyzed by two-  
1308 tailed unpaired  $t$  test. For the percentage in *Sox10*<sup>+rtTA</sup> mice from AAV-1d to AAV-  
1309 2d: at P14,  $t_{(10)} = 4.39$ ,  $P = 0.0014$ ; at P35,  $t_{(28)} = 6.041$ ,  $P < 0.0001$ . For the  
1310 percentage in *Plp*-tTA mice from AAV-1d to AAV-2d: at P14,  $t_{(26)} = 1.574$ ,  $P = 0.128$ ;  
1311 at P35,  $t_{(22)} = 2.367$ ,  $P = 0.027$ . For the density in *Sox10*<sup>+rtTA</sup> mice from AAV-1d to  
1312 AAV-2d: at P14,  $t_{(10)} = 5.685$ ,  $P = 0.0002$ ; at P35,  $t_{(28)} = 4.813$ ,  $P < 0.0001$ . For the  
1313 density in *Plp*-tTA mice from AAV-1d to AAV-2d: at P14,  $t_{(26)} = 1.581$ ,  $P = 0.126$ ; at

1314 P35,  $t_{(22)} = 1.429$ ,  $P = 0.167$ . **(I)** Schematic summary of OL stage-targeting  
1315 preferences of *Plp*-tTA or *Sox10*<sup>+/*rtTA*</sup> during juvenile to adolescent development.

1316

1317 **Figure 2-figure supplement 1.** Targeting preferences on OPCs or post-mitotic OLs  
1318 of *Plp*-tTA and *Sox10*<sup>+/*rtTA*</sup> from P14 to P35. **(A-D)** AAV-*TRE*-YFP was  
1319 stereotactically injected into the corpus callosum of *Sox10*<sup>+/*rtTA*</sup> or *Plp*-tTA mice at  
1320 P14 or P35. Brain sections obtained 1 (AAV-1d) or 2 (AAV-2d) days after virus  
1321 injection were co-immunostained by antibodies to YFP and Olig2, or by CC1  
1322 antibody and antibody to YFP, or by antibodies to YFP and NG2 (or PDGFR $\alpha$ ).  
1323 Shown are representative images for indicated mice at P14 or P35. *Sox10*<sup>+/*rtTA*</sup> mice  
1324 were fed with Dox for 3 days before stereotactic injection of the virus, while *Plp*-tTA  
1325 mice had no Dox treatment. **(E and F)** Distributions of infected cell, as shown by co-  
1326 immunostaining of YFP and TCF4, in the corpus callosum of *Sox10*<sup>+/*rtTA*</sup> (E) or *Plp*-  
1327 tTA (F) mice at P35. Note that infected cells in *Sox10*<sup>+/*rtTA*</sup> mice stringently  
1328 distributed within TCF4<sup>+</sup> cell clustered region, whereas those in *Plp*-tTA mice  
1329 distributed broadly in the corpus callosum. Solid arrows, regions with clustered  
1330 TCF4<sup>+</sup> cells; Open arrows, regions with fewer TCF4<sup>+</sup> cells.

1331

1332

1333 **Figure 3.** ErbB overactivation induces MO necroptosis in *Plp*-ErbB2<sup>V664E</sup> (PB) mice  
1334 but OPC apoptosis in *Sox10*-ErbB2<sup>V664E</sup> (SB) mice. **(A and I)** Dox treatment setting  
1335 for indicated mice and littermate controls. **(B)** The numbers of degenerating OLs  
1336 (represented by nuclei associated with CC1<sup>+</sup> cell debris, white arrows) increased in  
1337 the corpus callosum of *Plp*-ErbB2<sup>V664E</sup> mice starting from 6 dpd as revealed by CC1

1338 immunostaining. (C) Quantitative data of intact CC1<sup>+</sup> density in *Plp-ErbB2*<sup>V664E</sup> and  
1339 control mice (Ctrl) with indicated Dox treatment were present as mean ± s.e.m., and  
1340 analyzed by two-tailed unpaired *t* test. For 4 dpd,  $t_{(4)} = 1.485$ ,  $P = 0.212$ ; for 6 dpd,  $t_{(4)}$   
1341 = 5.203,  $P = 0.0065$ ; for 9 dpd,  $t_{(4)} = 20.95$ ,  $P < 0.0001$ . (D and J) Apoptotic cells  
1342 (arrows) in the corpus callosum of *Plp-ErbB2*<sup>V664E</sup> and control mice at 9 dpd (D), or  
1343 *Sox10-ErbB2*<sup>V664E</sup> and control mice at 9 dwd (J), were examined by TUNEL assays.  
1344 Note the increased numbers of nuclei (DAPI<sup>+</sup>) and non-specifically stained  
1345 hemorrhagic spot (asterisk), which is the consequence of inflammation, in the brain  
1346 slice of *Plp-ErbB2*<sup>V664E</sup> mice (D). (E) Quantitative data of apoptotic cell densities in  
1347 indicated mice. Data were presented as mean ± s.e.m., and analyzed by two-tailed  
1348 unpaired *t* test. For PB,  $t_{(6)} = 0.1128$ ,  $P = 0.914$ ; for SB,  $t_{(5)} = 8.344$ ,  $P = 0.0004$ . (F  
1349 and L) Co-immunostaining results of MLKL or RIP3 with CC1 in the corpus  
1350 callosum of indicated mice with indicated Dox treatments. (G) Western blotting  
1351 results of MLKL and RIP3 in the white matter of *Plp-ErbB2*<sup>V664E</sup> mice, or in that of  
1352 *Sox10-ErbB2*<sup>V664E</sup> mice, and in those of littermate control mice. ns, non-specific  
1353 bands. (H) Quantitative data of immunostaining and western blotting results of  
1354 MLKL or RIP3 in indicated mice at 9 days with Dox treatment. Data were presented  
1355 as mean ± s.e.m., and analyzed by two-tailed unpaired *t* test. In western blotting  
1356 results, for RIP3 protein in PB,  $t_{(4)} = 3.579$ ,  $P = 0.023$ ; for MLKL protein in PB,  $t_{(4)} =$   
1357 13.69,  $P = 0.00017$ . In immunostaining results, for percentage of RIP3<sup>+</sup> in CC1<sup>+</sup> cells  
1358 in PB,  $t_{(4)} = 6.002$ ,  $P = 0.0039$ ; for percentage of MLKL<sup>+</sup> in CC1<sup>+</sup> cells in PB,  $t_{(4)} =$   
1359 8.202,  $P = 0.0012$ . (K) Apoptotic cells (TUNEL<sup>+</sup>) were OPCs (NG2<sup>+</sup>) in *Sox10-*  
1360 *ErbB2*<sup>V664E</sup> mice at P30 with 9 dwd. Arrows, representative double positive cells.  
1361 Note OPCs in *Sox10-ErbB2*<sup>V664E</sup> mice were hypertrophic. The percentage of



1362 TUNEL<sup>+</sup>NG2<sup>+</sup> cells in NG2<sup>+</sup> cells were quantified and data were presented as mean ±  
1363 s.e.m. and analyzed by two-tailed unpaired *t* test.  $t_{(4)} = 3.95$ ,  $P = 0.0168$ .

1364

1365 **Figure 3-figure supplement 1.** Pathological OL proliferation in subcortical white  
1366 matter of *Plp-ErbB2*<sup>V664E</sup> mice. (A) Dramatically increased Olig2<sup>+</sup> and NG2<sup>+</sup> cells in  
1367 the subcortical white matter of *Plp-ErbB2*<sup>V664E</sup> mice at 14 dpd. Sagittal sections of  
1368 *Plp-ErbB2*<sup>V664E</sup> and littermate control mice were immunostained by antibodies for  
1369 Olig2 or NG2. (B and D) Immunostaining results of NG2 and TCF4 (B), Olig2 with  
1370 Ki67 (D), in the corpus callosum of indicated mice. (C and E) Quantitative data of  
1371 immunostaining results in *Plp-ErbB2*<sup>V664E</sup> (PB) and control mice (Ctrl) with indicated  
1372 Dox treatment were present as mean ± s.e.m., and analyzed by two-tailed unpaired *t*  
1373 test. For TCF4<sup>+</sup> density at 9 dpd,  $t_{(15)} = 2.1$ ,  $P = 0.053$ . For Olig2<sup>+</sup> density: at 4 dpd,  $t_{(6)}$   
1374  $= 0.2923$ ,  $P = 0.780$ ; at 6 dpd,  $t_{(6)} = 3.16$ ,  $P = 0.0196$ ; at 9 dpd,  $t_{(4)} = 8.563$ ,  $P = 0.001$ .  
1375 For NG2<sup>+</sup> density at 9 dpd,  $t_{(4)} = 9.912$ ,  $P = 0.0006$ . For Olig2<sup>+</sup>Ki67<sup>+</sup> density: at 4 dpd,  
1376  $t_{(4)} = 1.187$ ,  $P = 0.301$ ; at 6 dpd,  $t_{(4)} = 3.428$ ,  $P = 0.027$ ; at 9 dpd,  $t_{(4)} = 8$ ,  $P = 0.0013$ .

1377

1378

1379 **Figure 4.** ErbB inhibition induces hypomyelination in *Sox10*-dnEGFR (SE) mice, but  
1380 no myelin alteration in *Plp*-dnEGFR (PE) mice. (A and F) Dox treatment setting for  
1381 indicated mice and littermate controls. (B and G) MBP levels and the inhibited  
1382 phosphorylation in ErbB receptors were examined by western blotting in the white  
1383 matter of *Sox10*-dnEGFR mice, or *Plp*-dnEGFR mice, in comparison with that of  
1384 littermate controls (Ctrl). (C and H) Quantitative data of western blotting results. Data  
1385 were presented as mean ± s.e.m., and analyzed by two-tailed unpaired *t* test. In C at

1386 P35, for EGFR,  $t_{(4)} = 1.813$ ,  $P = 0.144$ ; for ErbB3,  $t_{(4)} = 25.94$ ,  $P < 0.0001$ ; for ErbB4,  
1387  $t_{(4)} = 12.69$ ,  $P = 0.00022$ ; for MBP,  $t_{(4)} = 0.7711$ ,  $P = 0.484$ . In C at P65, for EGFR,  $t_{(4)}$   
1388  $= 35.09$ ,  $P < 0.0001$ ; for ErbB3,  $t_{(4)} = 0.3492$ ,  $P = 0.745$ ; for ErbB4,  $t_{(4)} = 0.138$ ,  $P =$   
1389  $0.897$ ; for MBP,  $t_{(4)} = 4.842$ ,  $P = 0.0084$ . In H at P35, for EGFR,  $t_{(4)} = 28.36$ ,  $P <$   
1390  $0.0001$ ; for ErbB3,  $t_{(4)} = 4.925$ ,  $P = 0.0079$ ; for ErbB4,  $t_{(4)} = 8.838$ ,  $P = 0.0009$ ; for  
1391 MBP,  $t_{(4)} = 0.00896$ ,  $P = 0.993$ . In H at P65, for EGFR,  $t_{(4)} = 43.97$ ,  $P < 0.0001$ ; for  
1392 ErbB3,  $t_{(4)} = 5.157$ ,  $P = 0.0067$ ; for ErbB4,  $t_{(4)} = 44.67$ ,  $P < 0.0001$ ; for MBP,  $t_{(4)} =$   
1393  $0.4686$ ,  $P = 0.664$ . **(D and I)** LFB staining results of coronal sections through the genu  
1394 of the corpus callosum in *Sox10*-dnEGFR and control mice at P65 with 44 dwd (D),  
1395 or *Plp*-dnEGFR and control mice at P65 with 44 dpd (I). Black arrows indicate the  
1396 middle part of the corpus callosum in *Sox10*-dnEGFR mice exhibiting obvious lower  
1397 staining intensity. Quantitative data of LFB intensity were presented as mean  $\pm$  s.e.m.,  
1398 and analyzed by two-tailed unpaired  $t$  test. In D, for the middle part,  $t_{(6)} = 21.18$ ,  $P <$   
1399  $0.0001$ ; for the lateral part,  $t_{(6)} = 9.121$ ,  $P < 0.0001$ . In I, for the middle part,  $t_{(4)} =$   
1400  $1.814$ ,  $P = 0.144$ ; for the lateral part,  $t_{(4)} = 0.0287$ ,  $P = 0.979$ . **(E and J)** EM images of  
1401 the corpus callosum (CC), optic nerve (ON), and prefrontal cortex (PFC) from *Sox10*-  
1402 dnEGFR and littermate controls at 44 dwd (E), or *Plp*-dnEGFR and littermate  
1403 controls at 44 dpd (J).  $g$ -ratio was calculated for myelinated axons and averaged  $g$ -  
1404 ratio were analyzed by two-tailed unpaired  $t$  test (inset). In E, for CC,  $t_{(4)} = 2.793$ ,  $P =$   
1405  $0.0383$ ; for ON,  $t_{(7)} = 2.629$ ,  $P = 0.0339$ ; for PFC,  $t_{(4)} = 0.8697$ ,  $P = 0.434$ . In J, for CC,  
1406  $t_{(4)} = 0.1139$ ,  $P = 0.915$ ; for ON,  $t_{(4)} = 0.0754$ ,  $P = 0.944$ ; for PFC,  $t_{(4)} = 0.6334$ ,  $P =$   
1407  $0.561$ .

1408

1409 **Figure 4-figure supplement 1.** No myelin alteration in *Sox10*-dnEGFR (SE) or *Plp*-  
1410 dnEGFR (PE) mice at P35 with 14 days of Dox treatment. **(A and D)** Dox treatment

1411 setting for indicated mice and littermate controls. **(B and E)** Without an antibody  
1412 recognizing dnEGFR specifically, we examined the expression of dnEGFR/EGFR by  
1413 real-time RT-PCR. As *Sox10*<sup>+trTA</sup> targets a transient cellular stage, transcripts of  
1414 dnEGFR/EGFR in the subcortical white matter of *Sox10*-dnEGFR mice were only 4-  
1415 and 9-fold more than that of the endogenous EGFR in littermate controls (Ctrl) at P35  
1416 and P65, respectively, while that of *Plp*-dnEGFR mice were 90- and 24-fold more  
1417 than the endogenous EGFR transcripts in littermate controls at P35 and P65,  
1418 respectively. Data were presented as mean  $\pm$  s.e.m., and analyzed by two-tailed  
1419 unpaired *t* test. For *Sox10*-dnEGFR at P35,  $t_{(10)} = 5.044$ ,  $P = 0.0005$ ; at P65,  $t_{(10)} =$   
1420  $8.531$ ,  $P < 0.0001$ . For *Plp*-dnEGFR at P35,  $t_{(10)} = 4.908$ ,  $P = 0.0006$ ; at P65,  $t_{(10)} =$   
1421  $4.515$ ,  $P = 0.0011$ . **(C and F)** EM images of the corpus callosum (CC), optic nerve  
1422 (ON), and prefrontal cortex (PFC) from *Sox10*-dnEGFR and littermate controls at P35  
1423 with 14 dwd, or from *Plp*-dnEGFR and littermate controls at P35 with 14 dpd. *g*-ratio  
1424 was calculated for myelinated axons. Averaged *g*-ratio for each mouse (inset) were  
1425 presented as mean  $\pm$  s.e.m., and analyzed by two-tailed unpaired *t* test. In C, for CC,  
1426  $t_{(4)} = 0.1013$ ,  $P = 0.924$ ; for ON,  $t_{(4)} = 0.6191$ ,  $P = 0.569$ ; for PFC,  $t_{(4)} = 0.02485$ ,  $P =$   
1427  $0.981$ . In F, for CC,  $t_{(4)} = 0.1443$ ,  $P = 0.892$ ; for ON,  $t_{(4)} = 0.01551$ ,  $P = 0.988$ ; for  
1428 PFC,  $t_{(4)} = 0.1573$ ,  $P = 0.883$ .

1429

1430

1431 **Figure 5.** ErbB activation negatively regulates OPC proliferation. **(A-C)** Statistic  
1432 results of Olig2<sup>+</sup>, CC1<sup>+</sup>, and NG2<sup>+</sup> cell densities in the corpus callosum of *Sox10*-  
1433 ErbB2<sup>V664E</sup> mice (SB) and littermate controls (Ctrl) at P30 with 9 dwd, *Sox10*-  
1434 dnEGFR mice (SE) and littermate controls at P65 with 44 dwd, or *Plp*-dnEGFR mice

1435 (PE) and littermate controls at P65 with 44 dpd. Data were from repeated  
1436 immunostaining of 3 mice for each group, presented as mean  $\pm$  s.e.m., and analyzed  
1437 by two-tailed unpaired  $t$  test. In A, for Olig2<sup>+</sup>,  $t_{(4)} = 6.236$ ,  $P = 0.0034$ ; for CC1<sup>+</sup>,  $t_{(4)} =$   
1438  $16.92$ ,  $P < 0.0001$ ; for NG2<sup>+</sup>,  $t_{(4)} = 3.634$ ,  $P = 0.0221$ . In B, for Olig2<sup>+</sup>,  $t_{(10)} = 5.08$ ,  $P$   
1439  $= 0.0005$ ; for CC1<sup>+</sup>,  $t_{(4)} = 3.134$ ,  $P = 0.0351$ ; for NG2<sup>+</sup>,  $t_{(17)} = 6.387$ ,  $P < 0.0001$ . In C,  
1440 for Olig2<sup>+</sup>,  $t_{(10)} = 1.106$ ,  $P = 0.295$ ; for CC1<sup>+</sup>,  $t_{(4)} = 0.9848$ ,  $P = 0.381$ ; for NG2<sup>+</sup>,  $t_{(9)} =$   
1441  $1.062$ ,  $P = 0.316$ . **(D-F)** Double immunostaining results of Olig2 and Ki67 in the  
1442 corpus callosum of indicated mice at indicated ages. Arrows, representative double  
1443 positive nuclei. **(G)** Statistic results of densities of proliferating OL lineage cells  
1444 (Olig2<sup>+</sup>Ki67<sup>+</sup>) examined in indicated mice at indicated ages. Data were from  
1445 immunostaining of 3-4 mice for each group, presented as mean  $\pm$  s.e.m., and analyzed  
1446 by two-tailed unpaired  $t$  test. For *Sox10*-ErbB2<sup>V664E</sup> (SB) and control mice (Ctrl),  $t_{(4)} =$   
1447  $3.924$ ,  $P = 0.0172$ . For *Sox10*-dnEGFR (SE) and Ctrl, at P35,  $t_{(6)} = 0.5042$ ,  $P = 0.632$ ;  
1448 at P65,  $t_{(6)} = 2.963$ ,  $P = 0.0252$ . For *Plp*-dnEGFR (PE) and Ctrl, at P35,  $t_{(4)} = 0.1136$ ,  
1449  $P = 0.9151$ ; at P65,  $t_{(4)} = 0.6191$ ,  $P = 0.569$ . **(H and I)** Apoptotic cells (TUNEL<sup>+</sup>,  
1450 white arrows) in the corpus callosum of *Sox10*-dnEGFR mice (H), or *Plp*-dnEGFR  
1451 mice (I), were as few as that in littermate controls at indicated ages.

1452

1453 **Figure 5-figure supplement 1.** ErbB inhibition in OPC-NFOs increases OL numbers.  
1454 **(A-C)** Olig2<sup>+</sup>, CC1<sup>+</sup>, and NG2<sup>+</sup> cells in the corpus callosum of indicated mice at  
1455 indicated ages were examined by immunostaining. Statistic results in (A) showed  
1456 Olig2<sup>+</sup>, CC1<sup>+</sup>, and NG2<sup>+</sup> cell densities were similar in the corpus callosum of  
1457 *Sox10*<sup>+rtTA</sup> and littermate *TRE*-ErbB2<sup>V664E</sup> mice at P30 (9 dwd). Data were from  
1458 immunostaining of 3 mice for each group, presented as mean  $\pm$  s.e.m., and analyzed

1459 by two-tailed unpaired  $t$  test. For Olig2<sup>+</sup>,  $t_{(4)} = 1.418$ ,  $P = 0.229$ ; for CC1<sup>+</sup>,  $t_{(7)} =$   
1460 0.3431,  $P = 0.742$ ; for NG2<sup>+</sup>,  $t_{(4)} = 1.394$ ,  $P = 0.236$ .

1461

1462 **Figure 5-figure supplement 2.** No changes in OL numbers or proliferation in *Sox10-*  
1463 *dnEGFR* or *Plp-dnEGFR* mice at P35 with 14 days of Dox treatment. **(A and D)**  
1464 Statistic results of Olig2<sup>+</sup>, CC1<sup>+</sup>, and NG2<sup>+</sup> cell densities in the corpus callosum of  
1465 indicated mice at P35. Data were from repeated immunostaining of 3 mice for each  
1466 group, presented as mean  $\pm$  s.e.m., and analyzed by one-way ANOVA. In A, for  
1467 Olig2<sup>+</sup>,  $F_{(2,6)} = 1.651$ ,  $P = 0.268$ ; for CC1<sup>+</sup>,  $F_{(2,6)} = 0.8605$ ,  $P = 0.469$ ; for NG2<sup>+</sup>,  $F_{(2,17)}$   
1468  $= 1.624$ ,  $P = 0.226$ . In D, for Olig2<sup>+</sup>,  $F_{(2,6)} = 1.054$ ,  $P = 0.405$ ; for CC1<sup>+</sup>,  $F_{(2,6)} =$   
1469 0.2694,  $P = 0.773$ ; for NG2<sup>+</sup>,  $F_{(2,12)} = 1.633$ ,  $P = 0.236$ . **(B and E)** Immunostaining  
1470 results of Olig2<sup>+</sup>, CC1<sup>+</sup>, and NG2<sup>+</sup> cells in the corpus callosum of indicated mice at  
1471 P35. **(C and F)** Double immunostaining results of Olig2 and Ki67 in the corpus  
1472 callosum of indicated mice at P35. Arrows, representative double positive nuclei.

1473

1474

1475 **Figure 6.** ErbB activation positively regulates NFO differentiation. **(A)** RNA-seq was  
1476 performed for white matter tissues isolated from *Sox10-ErbB2*<sup>V664E</sup> mice at P30 with 9  
1477 dwd, or *Sox10-dnEGFR* mice at P35 with 14 dwd, and their littermate controls. For  
1478 each mouse group we sequenced three pairs of samples and identified 2298 genes that  
1479 had altered expression in the white matter of *Sox10-ErbB2*<sup>V664E</sup> mice (Figure 6-Source  
1480 data 1), as well as 1184 genes in that of *Sox10-dnEGFR* mice (Figure 6-Source data 2).  
1481 By comparing the two groups of genes, 68 genes with similar expression tendencies in  
1482 the white matter of *Sox10-ErbB2*<sup>V664E</sup> (*soxEb vs treEb*) and *Sox10-dnEGFR* (*soxEg*

1483 vs treEG) mice were identified. Heat maps of Z value of each gene are presented. The  
1484 raw RNA-seq data have been deposited in the GEO and SRA database and can be  
1485 found at GEO: GSE123491. **(B-D)** *In situ* hybridization results of *Enpp6* in the corpus  
1486 callosum of *Sox10-ErbB2<sup>V664E</sup>* mice (B), *Sox10-dnEGFR* mice (C), or *Plp-dnEGFR*  
1487 mice (D), and their littermate controls at indicated ages. **(E)** Statistic results of *Enpp6<sup>+</sup>*  
1488 cell densities examined in indicated mice at indicated ages. Data were from repeated  
1489 experiments of 3 mice for each group, presented as mean  $\pm$  s.e.m., and analyzed by  
1490 two-tailed unpaired *t* test. For *Sox10-ErbB2<sup>V664E</sup>* mice (SB) and control mice (Ctrl) at  
1491 P30,  $t_{(12)} = 4.638$ ,  $P = 0.0006$ . For *Sox10-dnEGFR* mice (SE) and Ctrl, at P35,  $t_{(9)} =$   
1492  $2.704$ ,  $P = 0.024$ ; at P65,  $t_{(7)} = 0.8322$ ,  $P = 0.433$ . For *Plp-dnEGFR* mice (PE) and  
1493 Ctrl, at P35,  $t_{(10)} = 3.45$ ,  $P = 0.0062$ ; at P65,  $t_{(6)} = 0.7724$ ,  $P = 0.469$ . **(F-H)**  
1494 Immunostaining results of TCF4 in the corpus callosum of *Sox10-ErbB2<sup>V664E</sup>* mice  
1495 (F), *Sox10-dnEGFR* (G), or *Plp-dnEGFR* (H), with their littermate controls at  
1496 indicated ages. **(I)** Statistic results of TCF4<sup>+</sup> cell densities examined in indicated mice  
1497 at indicated ages. Data were from repeated experiments of 3 mice for each group,  
1498 presented as mean  $\pm$  s.e.m., and analyzed by two-tailed unpaired *t* test. For *Sox10-*  
1499 *ErbB2<sup>V664E</sup>* mice (SB) and control mice (Ctrl) at P27,  $t_{(4)} = 3.883$ ,  $P = 0.0178$ . For  
1500 *Sox10-dnEGFR* mice (SE) and Ctrl, at P35,  $t_{(6)} = 4.107$ ,  $P = 0.006$ ; at P65,  $t_{(6)} =$   
1501  $0.1948$ ,  $P = 0.852$ . For *Plp-dnEGFR* mice (PE) and Ctrl, at P35,  $t_{(6)} = 6.776$ ,  $P =$   
1502  $0.0005$ ; at P65,  $t_{(6)} = 0.7845$ ,  $P = 0.463$ . **(J)** Ratio of TCF4<sup>+</sup> to CC1<sup>+</sup> cell numbers in  
1503 indicated mice at indicated ages. Data were from 3 mice for each group, presented as  
1504 mean  $\pm$  s.e.m., and analyzed by two-tailed unpaired *t* test. For *Sox10-dnEGFR* mice  
1505 (SE) at P35,  $t_{(4)} = 4.251$ ,  $P = 0.0131$ ; for *Plp-dnEGFR* mice (PE) at P35,  $t_{(4)} = 7.762$ ,  $P$   
1506  $= 0.0015$ ; for *Sox10-ErbB2<sup>V664E</sup>* (SB) mice at P27,  $t_{(4)} = 3.322$ ,  $P = 0.029$ .

1507

1508

1509 **Figure 7.** ErbB inhibition in MOs suppresses axonal conduction under energy stress  
1510 and impairs working memory in the absence of myelin alteration. (A and C) Rotarod  
1511 test, n = 12 mice for *Sox10*-dnEGFR and n = 12 mice for controls (two-way ANOVA  
1512 test,  $F_{(1, 176)} = 7.824$ ,  $P = 0.0057$ ), while n = 12 mice for *Plp*-dnEGFR and n = 13 mice  
1513 for controls (two-way ANOVA test,  $F_{(1, 184)} = 1.4$ ,  $P = 0.238$ ). (B and D) Open field  
1514 tests, n = 13 mice for *Sox10*-dnEGFR and n = 11 mice for controls (two-way ANOVA  
1515 test,  $F_{(1, 132)} = 6.302$ ,  $P = 0.013$ ), while n = 14 mice for *Plp*-dnEGFR and n = 19 mice  
1516 for controls (two-way ANOVA test,  $F_{(1, 186)} = 12.17$ ,  $P = 0.0006$ ). (E and F) Eight-  
1517 arm radial water maze test, n = 12 mice for *Sox10*-dnEGFR and n = 7 mice for  
1518 controls (for working memory error, two-way ANOVA test,  $F_{(1, 68)} = 6.334$ ,  $P = 0.014$ ;  
1519 for reference memory error, two-way ANOVA test,  $F_{(1, 68)} = 0.0423$ ,  $P = 0.838$ ; for  
1520 visible platform, two-tailed unpaired *t* test,  $t_{(17)} = 1.137$ ,  $P = 0.271$ ), while n = 14 mice  
1521 for *Plp*-dnEGFR and n = 10 mice for controls (for working memory error, two-way  
1522 ANOVA test,  $F_{(1, 88)} = 4.782$ ,  $P = 0.0314$ ; for reference memory error, two-way  
1523 ANOVA test,  $F_{(1, 88)} = 0.498$ ,  $P = 0.482$ ; for visible platform, two-tailed unpaired *t*  
1524 test,  $t_{(22)} = 0.8254$ ,  $P = 0.418$ ). Data were presented as mean  $\pm$  s.e.m.. In illustrative  
1525 examples of the travel pathways of indicated mice, green circles indicate the last arms  
1526 with a hidden platform, while red crosses indicate the arms with used platforms in the  
1527 past three trials. (G and H) Axonal excitability is similar in *Plp*-dnEGFR optic nerves  
1528 and control nerves (G), but decreased in *Sox10*-dnEGFR optic nerves in comparison  
1529 with controls (H). CAPs of optic nerves generated by electrical stimuli with intensities  
1530 at stepped increase (0-0.2 mA) were recorded *ex vivo*. Data were from 3-7 optic  
1531 nerves of 3-5 mice for each group, presented as mean  $\pm$  s.e.m., and analyzed by two-  
1532 way ANOVA. In G,  $F_{(1, 202)} = 0.2118$ ,  $P = 0.646$ . In H,  $F_{(1, 139)} = 102.1$ ,  $P < 0.0001$ .

1533 Representative maximal CAPs for each group are shown at the left. **(I and J)** The  
1534 CAP decline induced by OGD is slightly accelerated and aggravated in *Plp*-dnEGFR  
1535 optic nerves (I), but decelerated and attenuated in *Sox10*-dnEGFR optic nerves (J).  
1536 OGD was started for the recorded nerves after 1-hr baseline stimulation, and stopped  
1537 after another hour by restoring the bathing media to oxygenated ACSF. Initial CAPs  
1538 were recorded after 30-min baseline stimulation. The areas under CAPs were  
1539 measured and normalized to the initial levels. Data were from 4-8 optic nerves of 3-5  
1540 mice for each group, presented as mean  $\pm$  s.e.m., and analyzed by two-way ANOVA.  
1541 In I, for baseline,  $F_{(1, 1572)} = 320.7$ ,  $P < 0.0001$ ; for OGD,  $F_{(1, 2280)} = 47.95$ ,  $P < 0.0001$ ;  
1542 for recovery,  $F_{(1, 2040)} = 5.896$ ,  $P = 0.015$ . In J, for baseline,  $F_{(1, 732)} = 87.06$ ,  $P <$   
1543  $0.0001$ ; for OGD,  $F_{(1, 1140)} = 196.6$ ,  $P < 0.0001$ ; for recovery,  $F_{(1, 1020)} = 173.1$ ,  $P <$   
1544  $0.0001$ . **(K and L)** Neuronal activities with frequency at 5-100Hz increased the CAP  
1545 decline in *Plp*-dnEGFR optic nerves (K), but increased the CAPs at 10-25Hz and  
1546 slowed the CAP decline at 50-100Hz in *Sox10*-dnEGFR optic nerves (L), in  
1547 comparison with their controls, respectively. Data were from 4-8 optic nerves of 3-5  
1548 mice for each group, presented as mean  $\pm$  s.e.m., and analyzed by two-way ANOVA.  
1549 In K, for 1Hz,  $F_{(1, 270)} = 0.076$ ,  $P = 0.783$ ; for 5Hz,  $F_{(1, 1044)} = 147.5$ ,  $P < 0.0001$ ; for  
1550 10Hz,  $F_{(1, 27)} = 17.64$ ,  $P = 0.0003$ ; for 25Hz,  $F_{(1, 54)} = 14.26$ ,  $P = 0.0004$ ; for 50Hz,  $F_{(1,$   
1551  $90)} = 19.82$ ,  $P < 0.0001$ ; for 100Hz,  $F_{(1, 135)} = 52.82$ ,  $P < 0.0001$ . In L, for 1Hz,  $F_{(1, 390)}$   
1552  $= 52.7$ ,  $P < 0.0001$ ; for 5Hz,  $F_{(1, 1508)} = 4.194$ ,  $P = 0.041$ ; for 10Hz,  $F_{(1, 39)} = 8.352$ ,  $P$   
1553  $= 0.0063$ ; for 25Hz,  $F_{(1, 78)} = 50.46$ ,  $P < 0.0001$ ; for 50Hz,  $F_{(1, 130)} = 46.3$ ,  $P < 0.0001$ ;  
1554 for 100Hz,  $F_{(1, 195)} = 19.59$ ,  $P < 0.0001$ . **(M)** Schematic illustration of the  
1555 pathophysiological consequences induced by ErbB receptor dysregulation in different  
1556 OL stages as well as the pathogenic mechanisms (emphasized in brown).

1557



1558 **Figure 7-figure supplement 1.** No behavioral abnormalities in sensory gating, social  
1559 interaction, or mood behaviors revealed for *Sox10*-dnEGFR or *Plp*-dnEGFR mice.  
1560 Behavioral performance of adult *Sox10*-dnEGFR mice with littermate controls (A-E),  
1561 or *Plp*-dnEGFR mice with littermate controls (F-J), were tested in the open field test  
1562 (A and F), social interaction test (B and G), prepulse inhibition (PPI) test (C and H),  
1563 stereotyped behaviors in the open field (D and I), and the forced swim test and the tail  
1564 suspension test (E and J). For zone analysis of open field tests, n = 13 mice for  
1565 *Sox10*-dnEGFR and n = 11 mice for controls (two-way ANOVA test,  $F_{(1, 44)} = 0$ ,  $P >$   
1566  $0.9999$ ), while n = 14 mice for *Plp*-dnEGFR and n = 19 mice for controls (two-way  
1567 ANOVA test,  $F_{(1, 62)} = 0.00017$ ,  $P = 0.989$ ). For PPI tests, n = 12 mice for *Sox10*-  
1568 dnEGFR and n = 10 mice for controls (two-way ANOVA test,  $F_{(1, 60)} = 2.36$ ,  $P =$   
1569  $0.13$ ), while n = 12 mice for *Plp*-dnEGFR and n = 14 mice for controls (two-way  
1570 ANOVA test,  $F_{(1, 72)} = 0.9134$ ,  $P = 0.342$ ). For social interaction tests, n = 13 mice for  
1571 *Sox10*-dnEGFR and n = 12 mice for controls (two-way ANOVA test,  $F_{(1, 46)} = 0.027$ ,  
1572  $P = 0.87$ ), while n = 13 mice for *Plp*-dnEGFR and n = 14 mice for controls (two-way  
1573 ANOVA test,  $F_{(1, 50)} = 0.1023$ ,  $P = 0.75$ ). For forced swim and tail suspension tests, n  
1574 = 13 mice for *Sox10*-dnEGFR and n = 10 mice for controls (two-tailed unpaired  $t$  test,  
1575 for forced swim,  $t_{(21)} = 0.1799$ ,  $P = 0.859$ ; for tail suspension,  $t_{(21)} = 0.2576$ ,  $P =$   
1576  $0.799$ ), while n = 13 mice for *Plp*-dnEGFR and n = 13 mice for controls (two-tailed  
1577 unpaired  $t$  test, for forced swim,  $t_{(24)} = 0.2676$ ,  $P = 0.791$ ; for tail suspension,  $t_{(24)} =$   
1578  $1.189$ ,  $P = 0.246$ ). Data were presented as mean  $\pm$  s.e.m.. Note that only male mice  
1579 were used for PPI, social interaction, forced swim and tail suspension tests. (K)  
1580 Illustration showing the setting for eight-arm radial water maze. Four hidden  
1581 platforms were placed at the end of a same set of arms with 38-cm distance to the  
1582 central zone at the training and test days. Mice started swimming with face to the arm

1583 end from No.1 arm in each trial, and the visited platform was removed before the next  
1584 trial after 30-sec gap.

1585

1586 **Other Supplemental Files:**

1587 **Figure 7-Video 1.** The performances recorded for *Sox10*-dnEGFR mice and *Plp*-  
1588 dnEGFR mice, as well as their controls, in the 4th trial of eight arm radial water maze  
1589 at the test day.

1590 **Figure 6-Source data 1.** The Excel file contains the processed RNA-seq results of  
1591 genes with differential expression in white matter tissues between *Sox10*-ErbB2<sup>V664E</sup>  
1592 mice and littermate *TRE*-ErbB2<sup>V664E</sup> mice at P30 with 9 dwd.

1593 **Figure 6-Source data 2.** The Excel file contains the processed RNA-seq results of  
1594 genes with differential expression in white matter tissues between *Sox10*-dnEGFR  
1595 mice and littermate *TRE*-dnEGFR mice at P35 with 14 dwd.

1596 **Source data for graphs.** The zip file includes all raw numerical data in Prism files  
1597 for graphs in each figure.

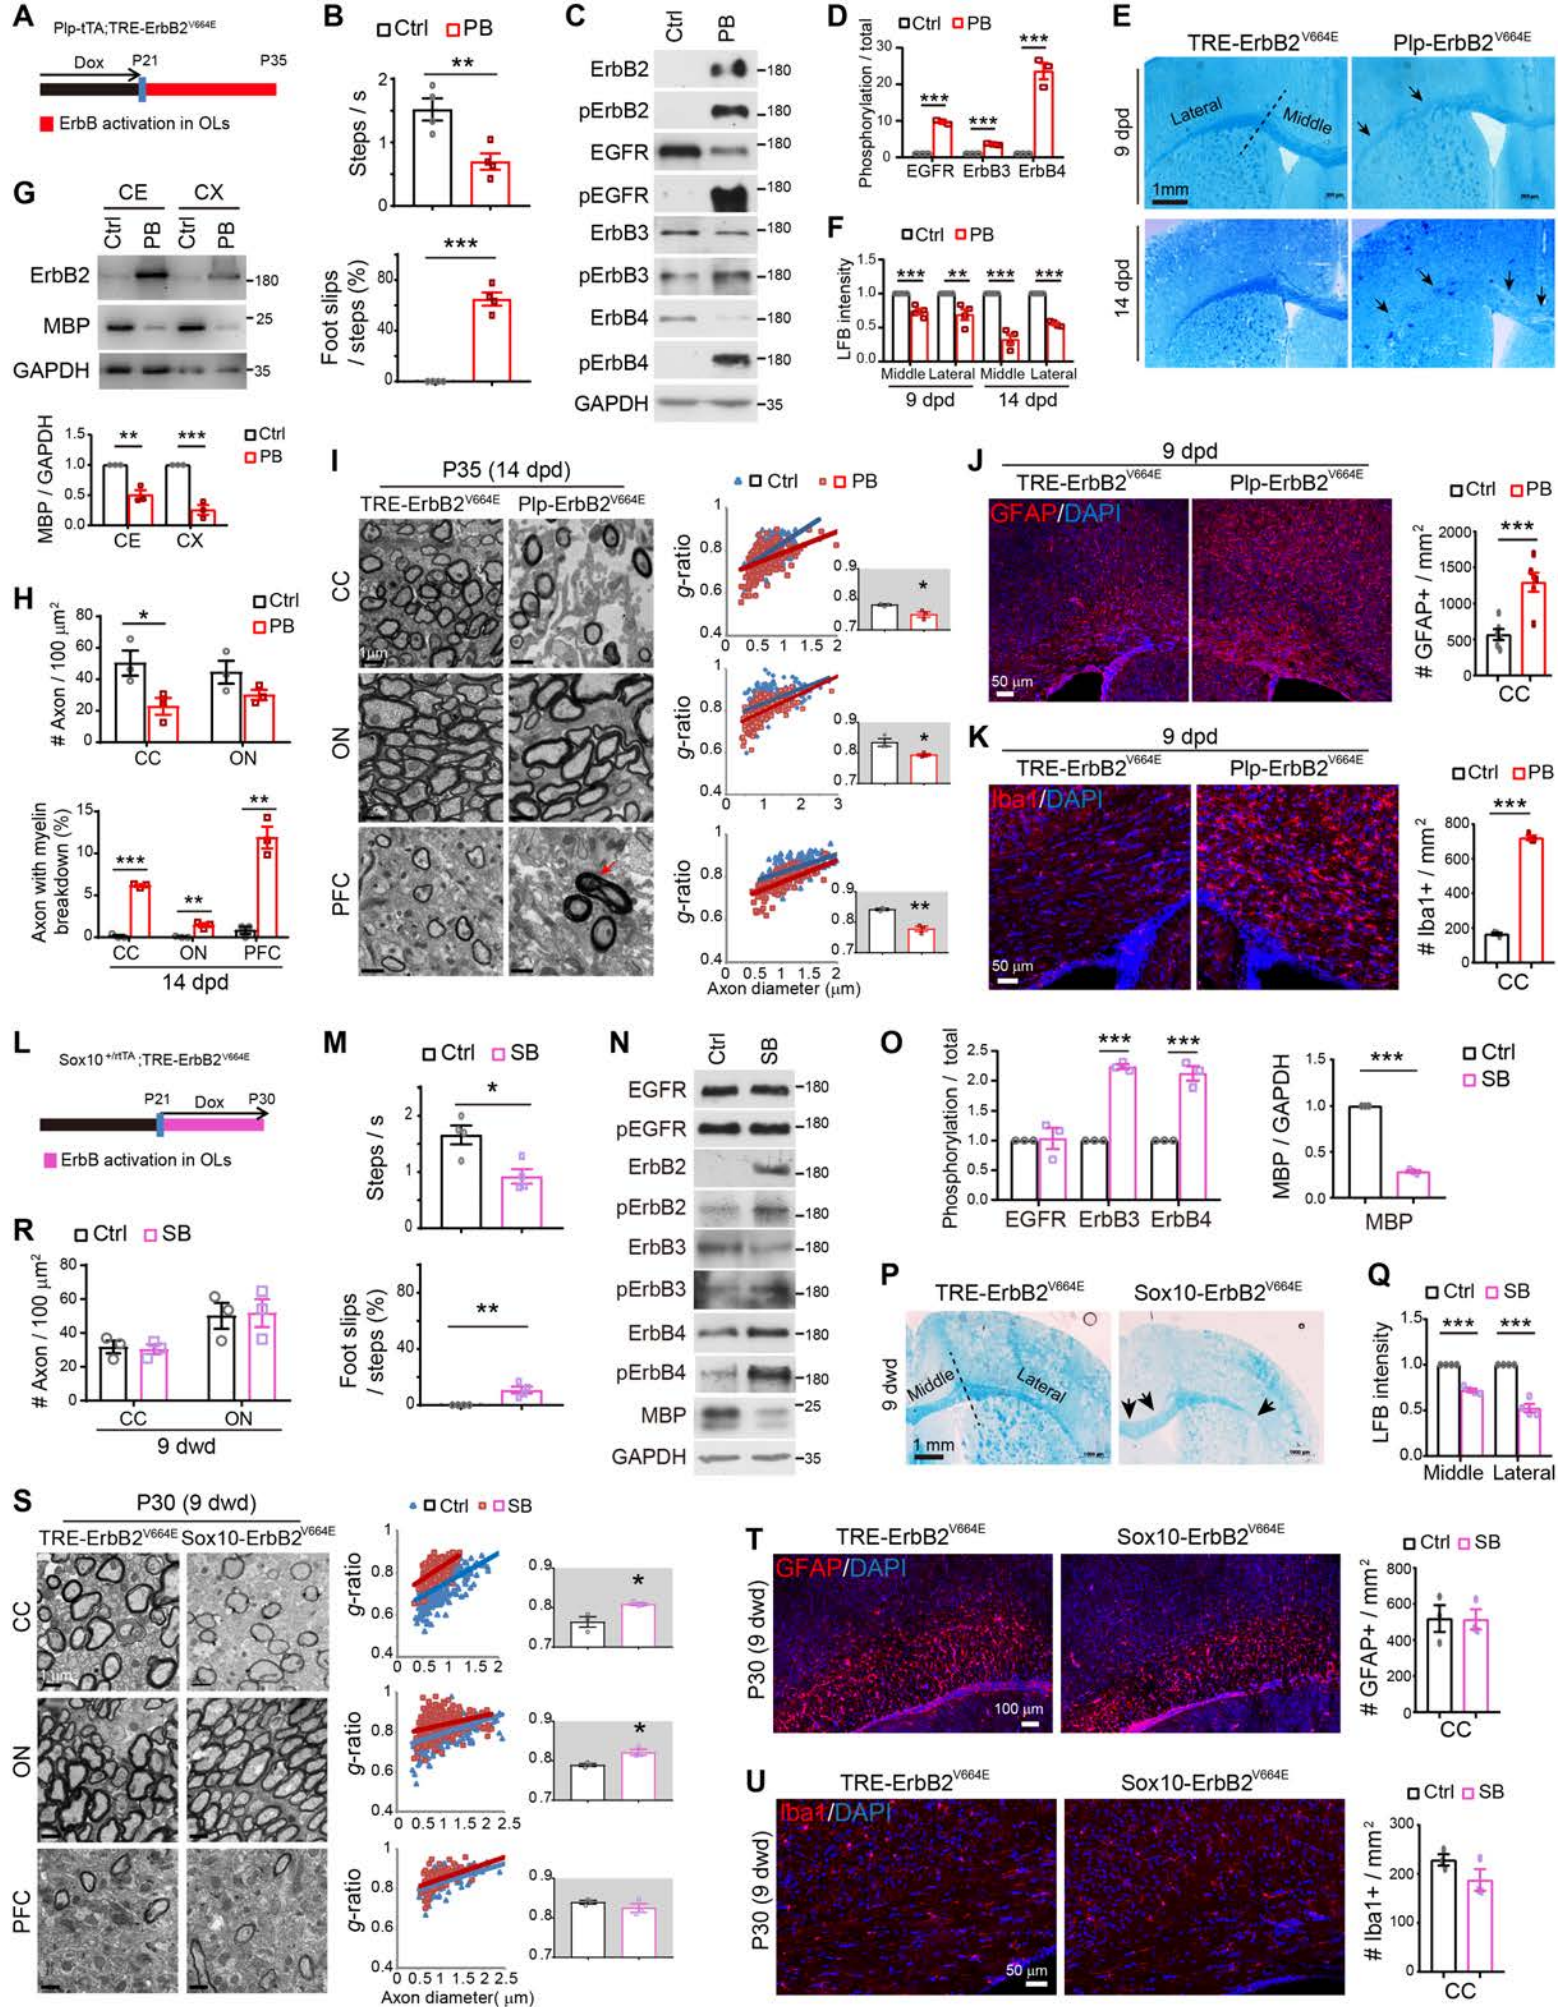

Figure 1

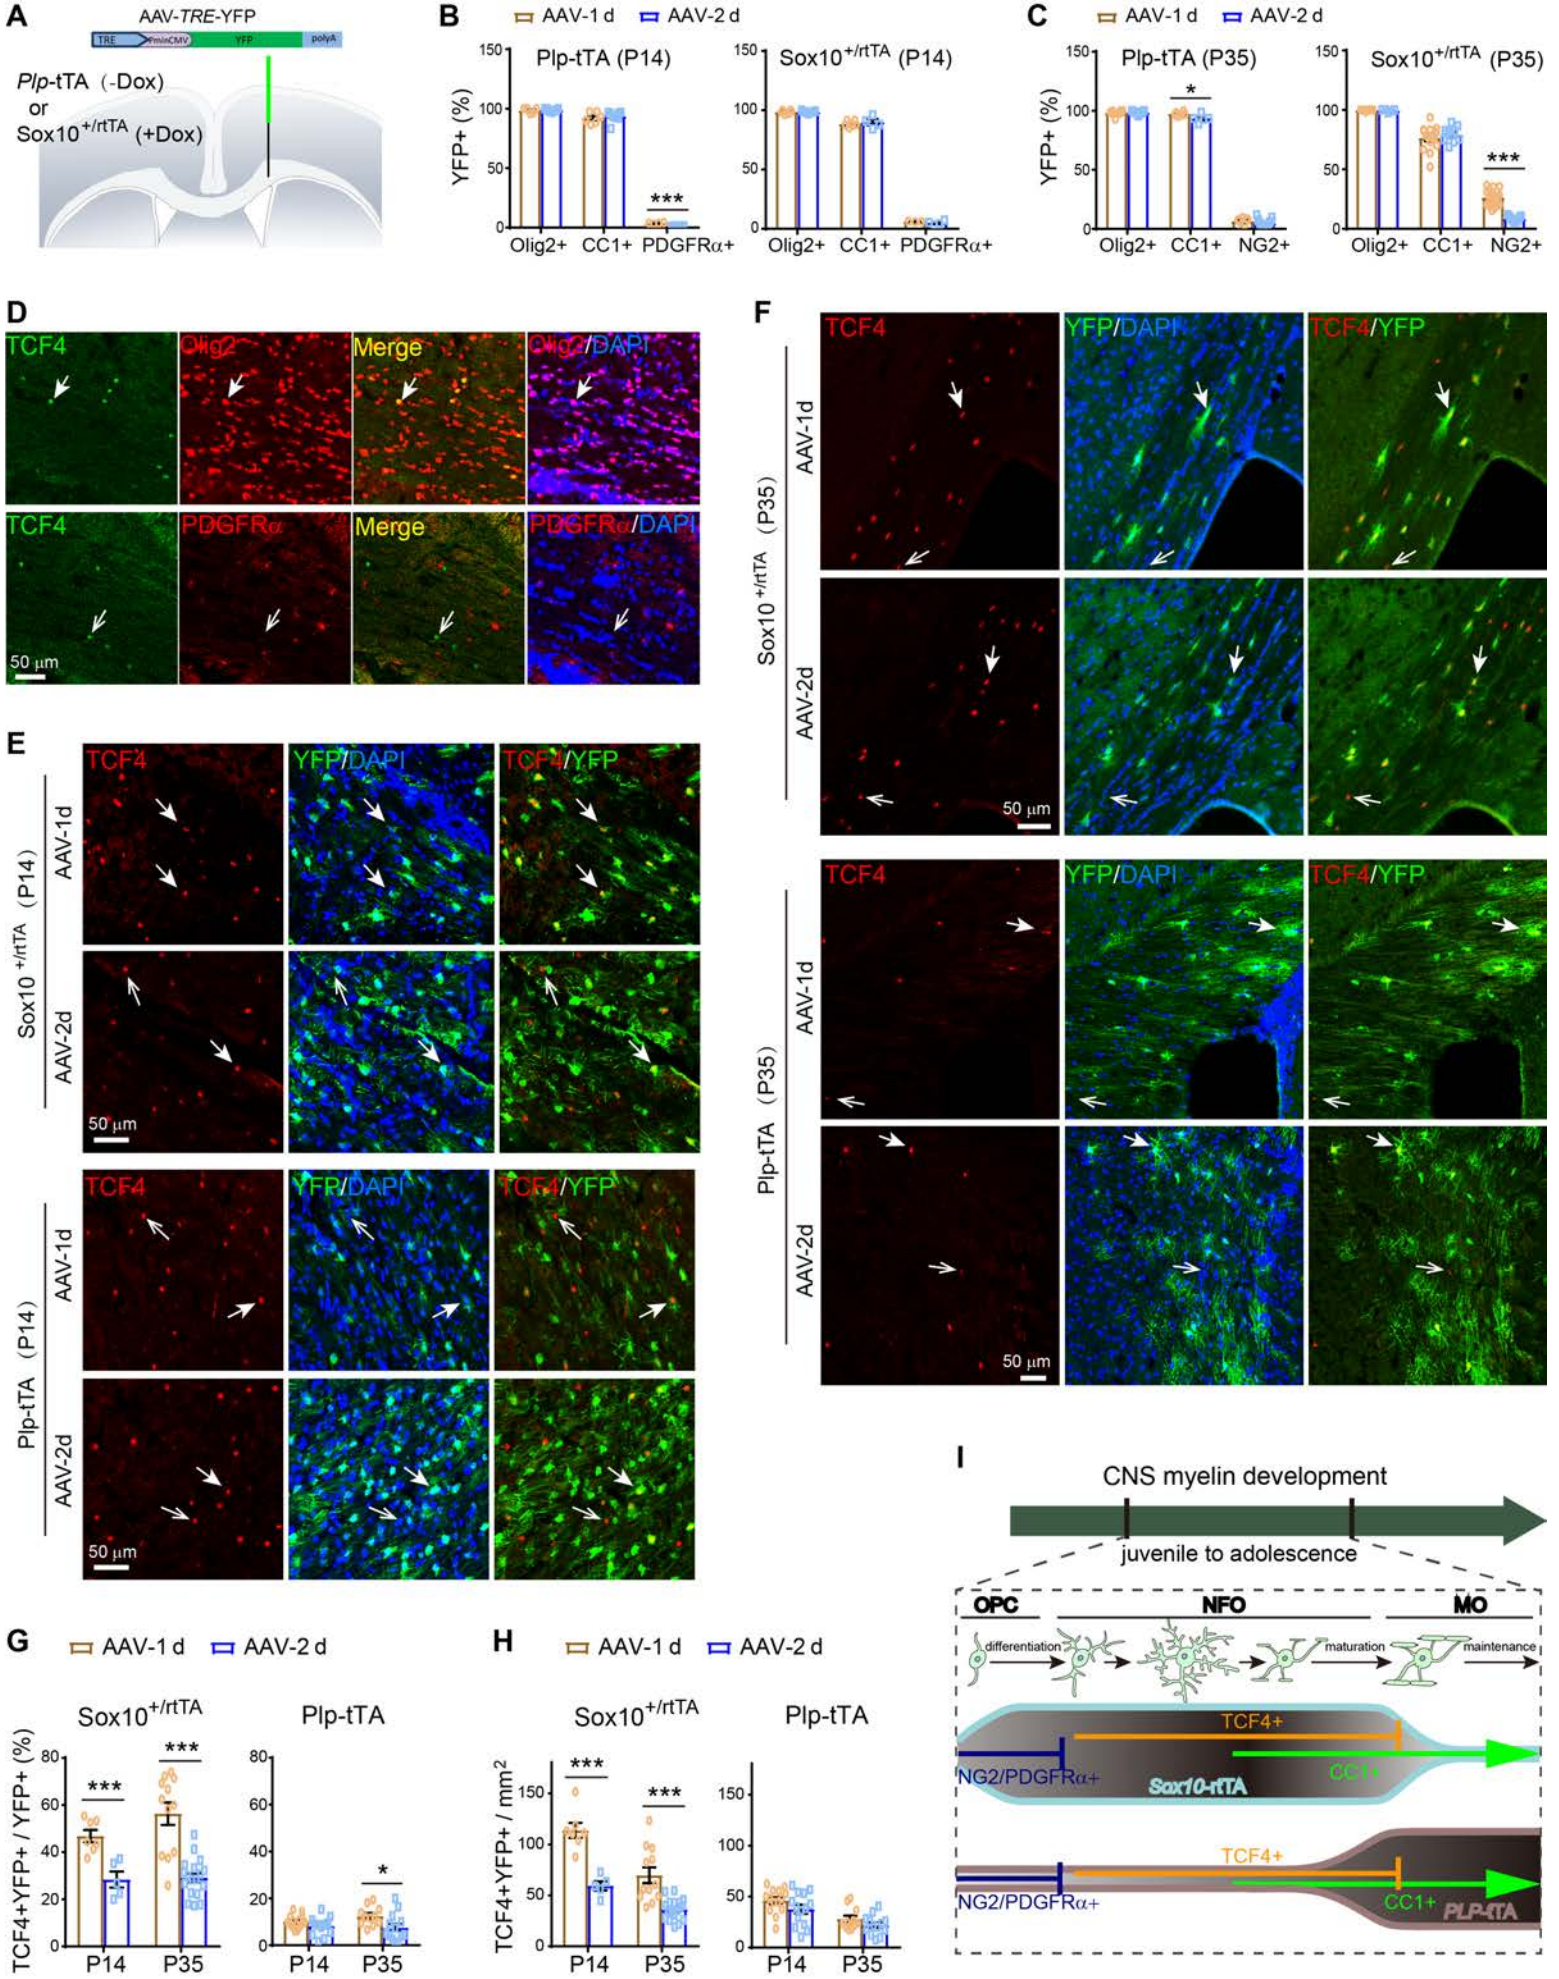

Figure 2

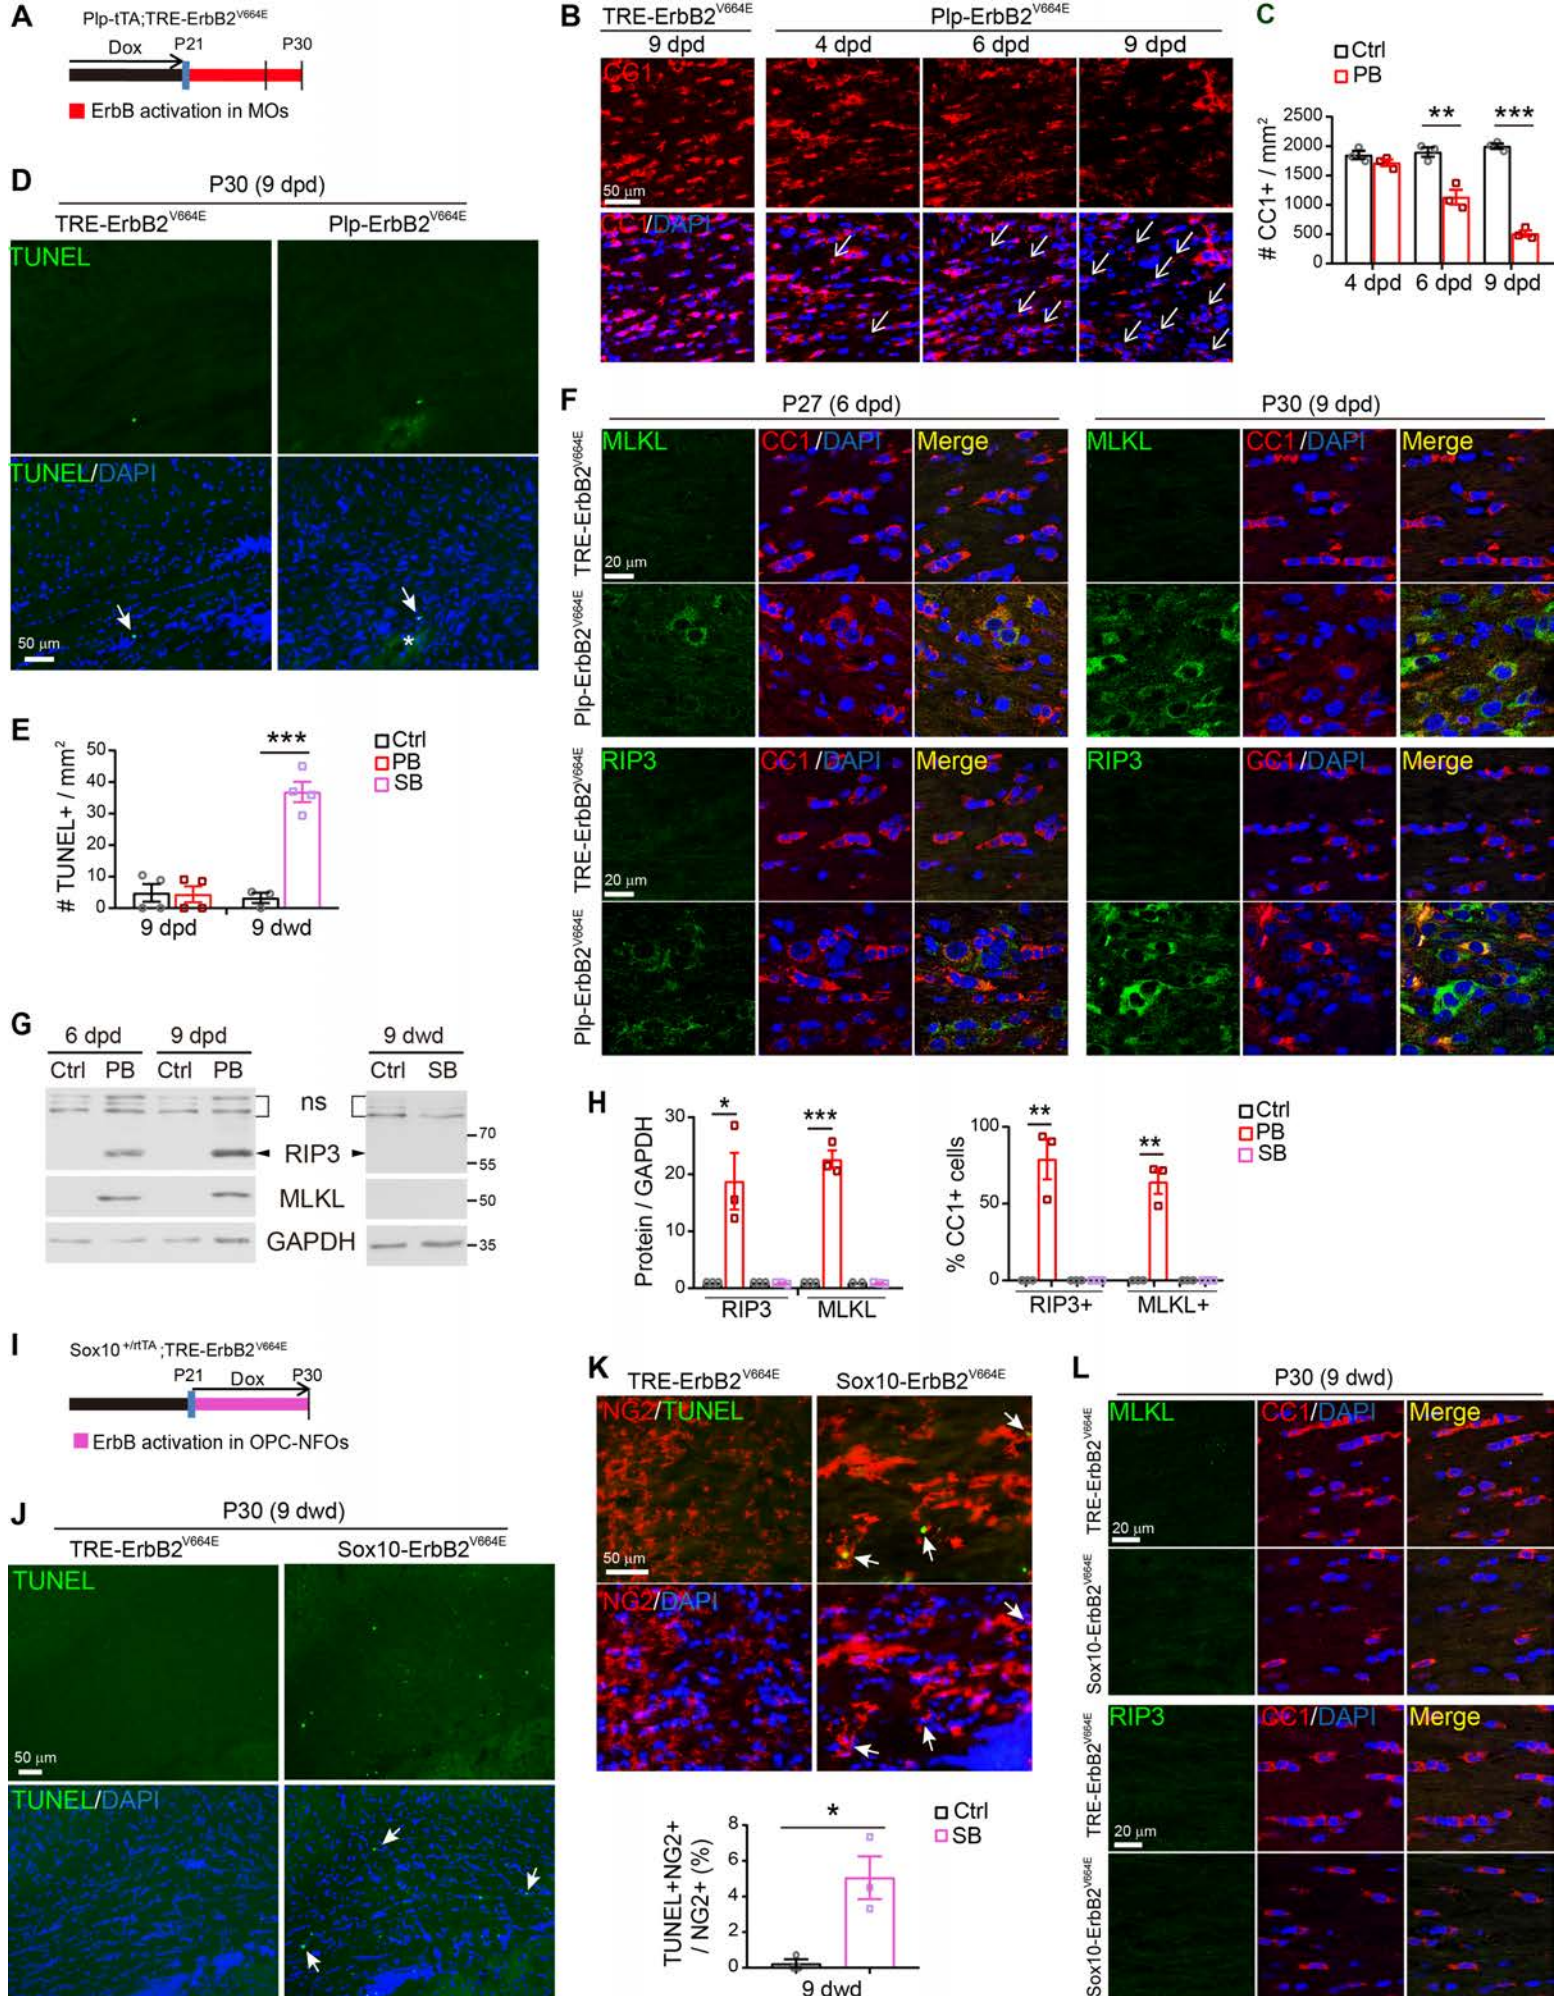

Figure 3

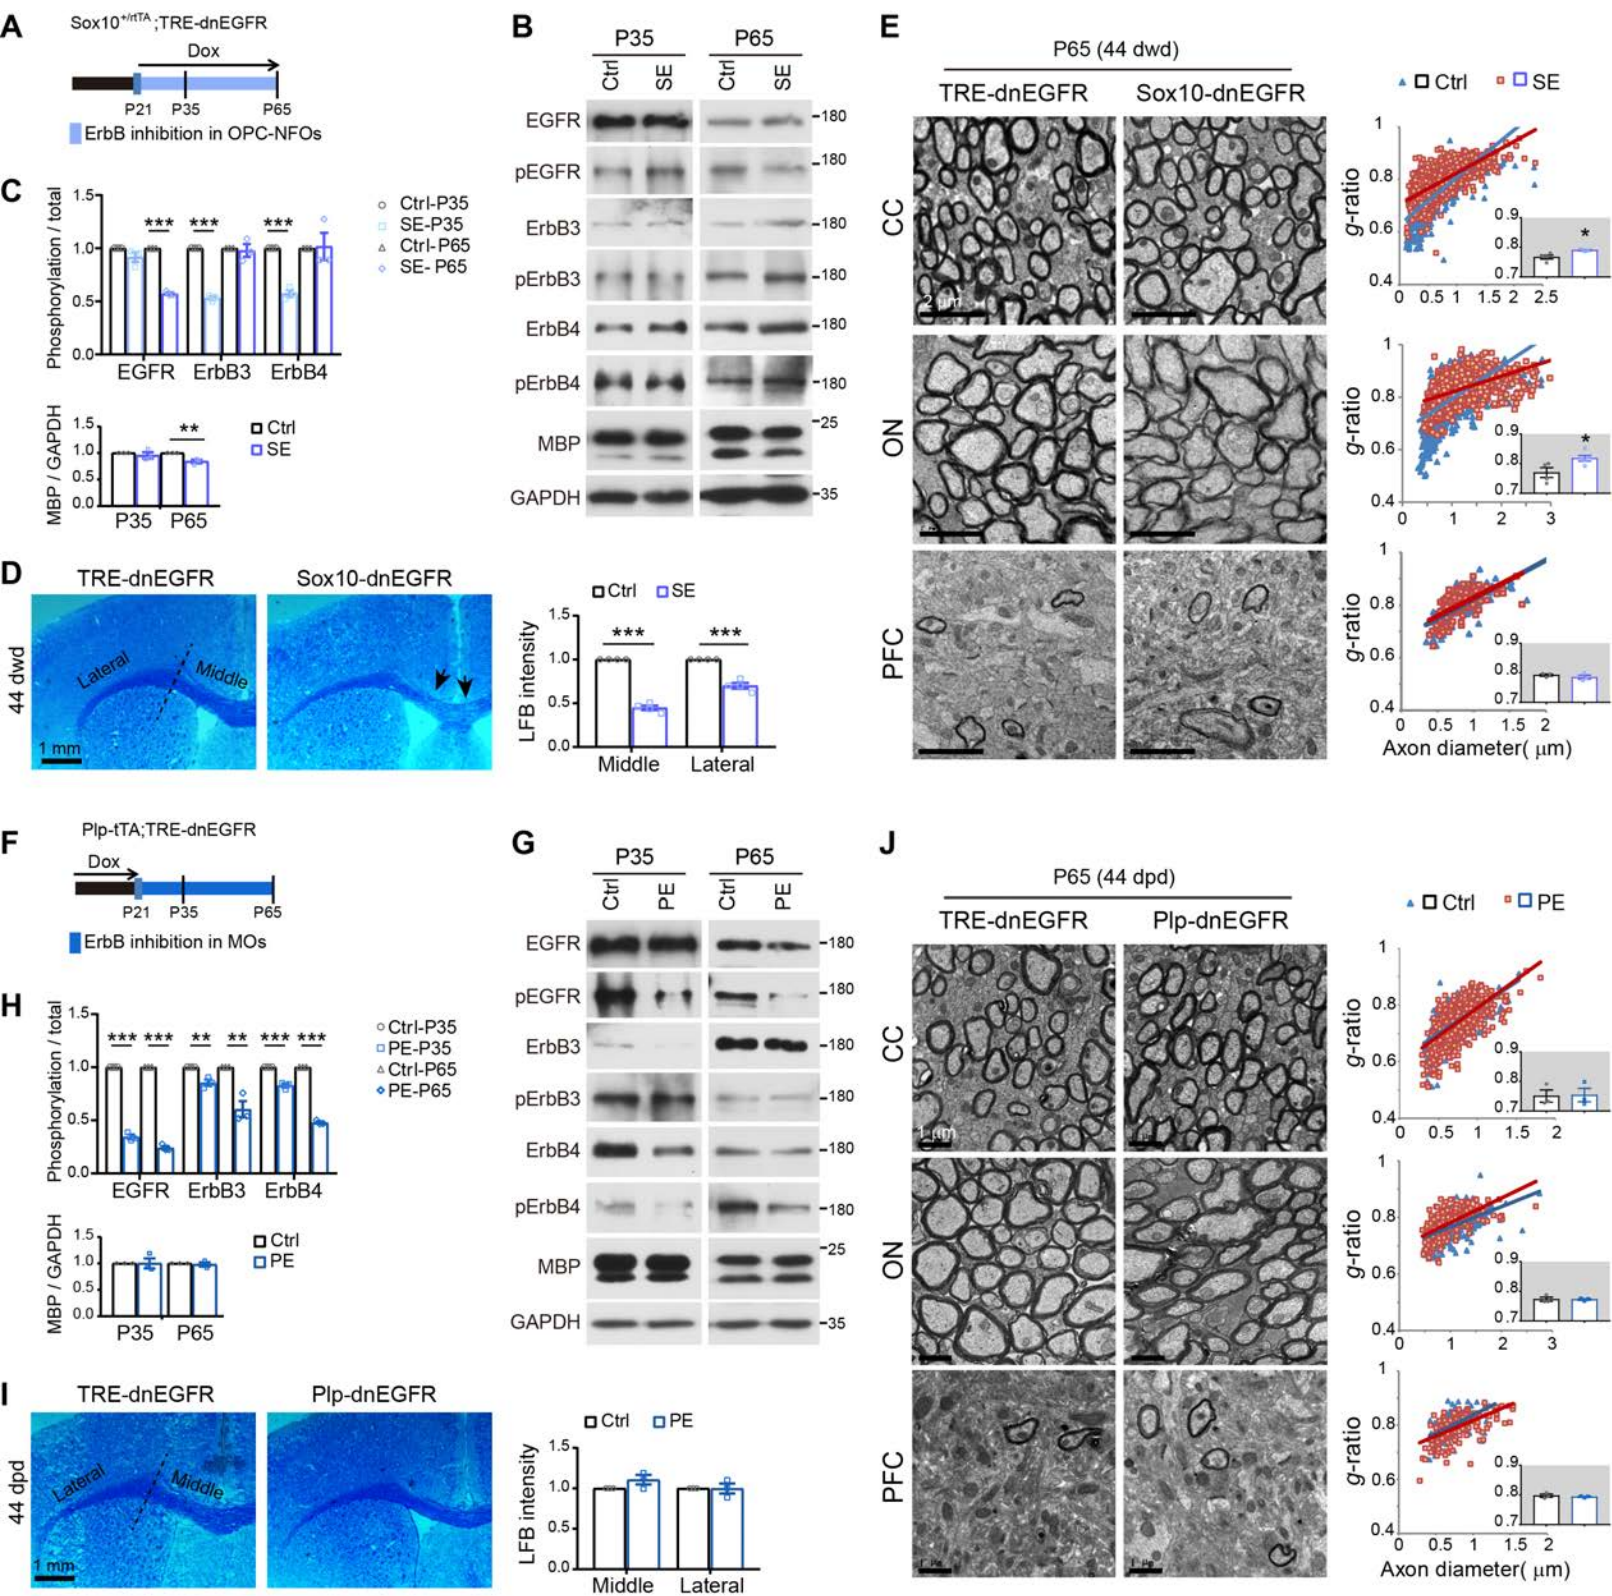

Figure 4

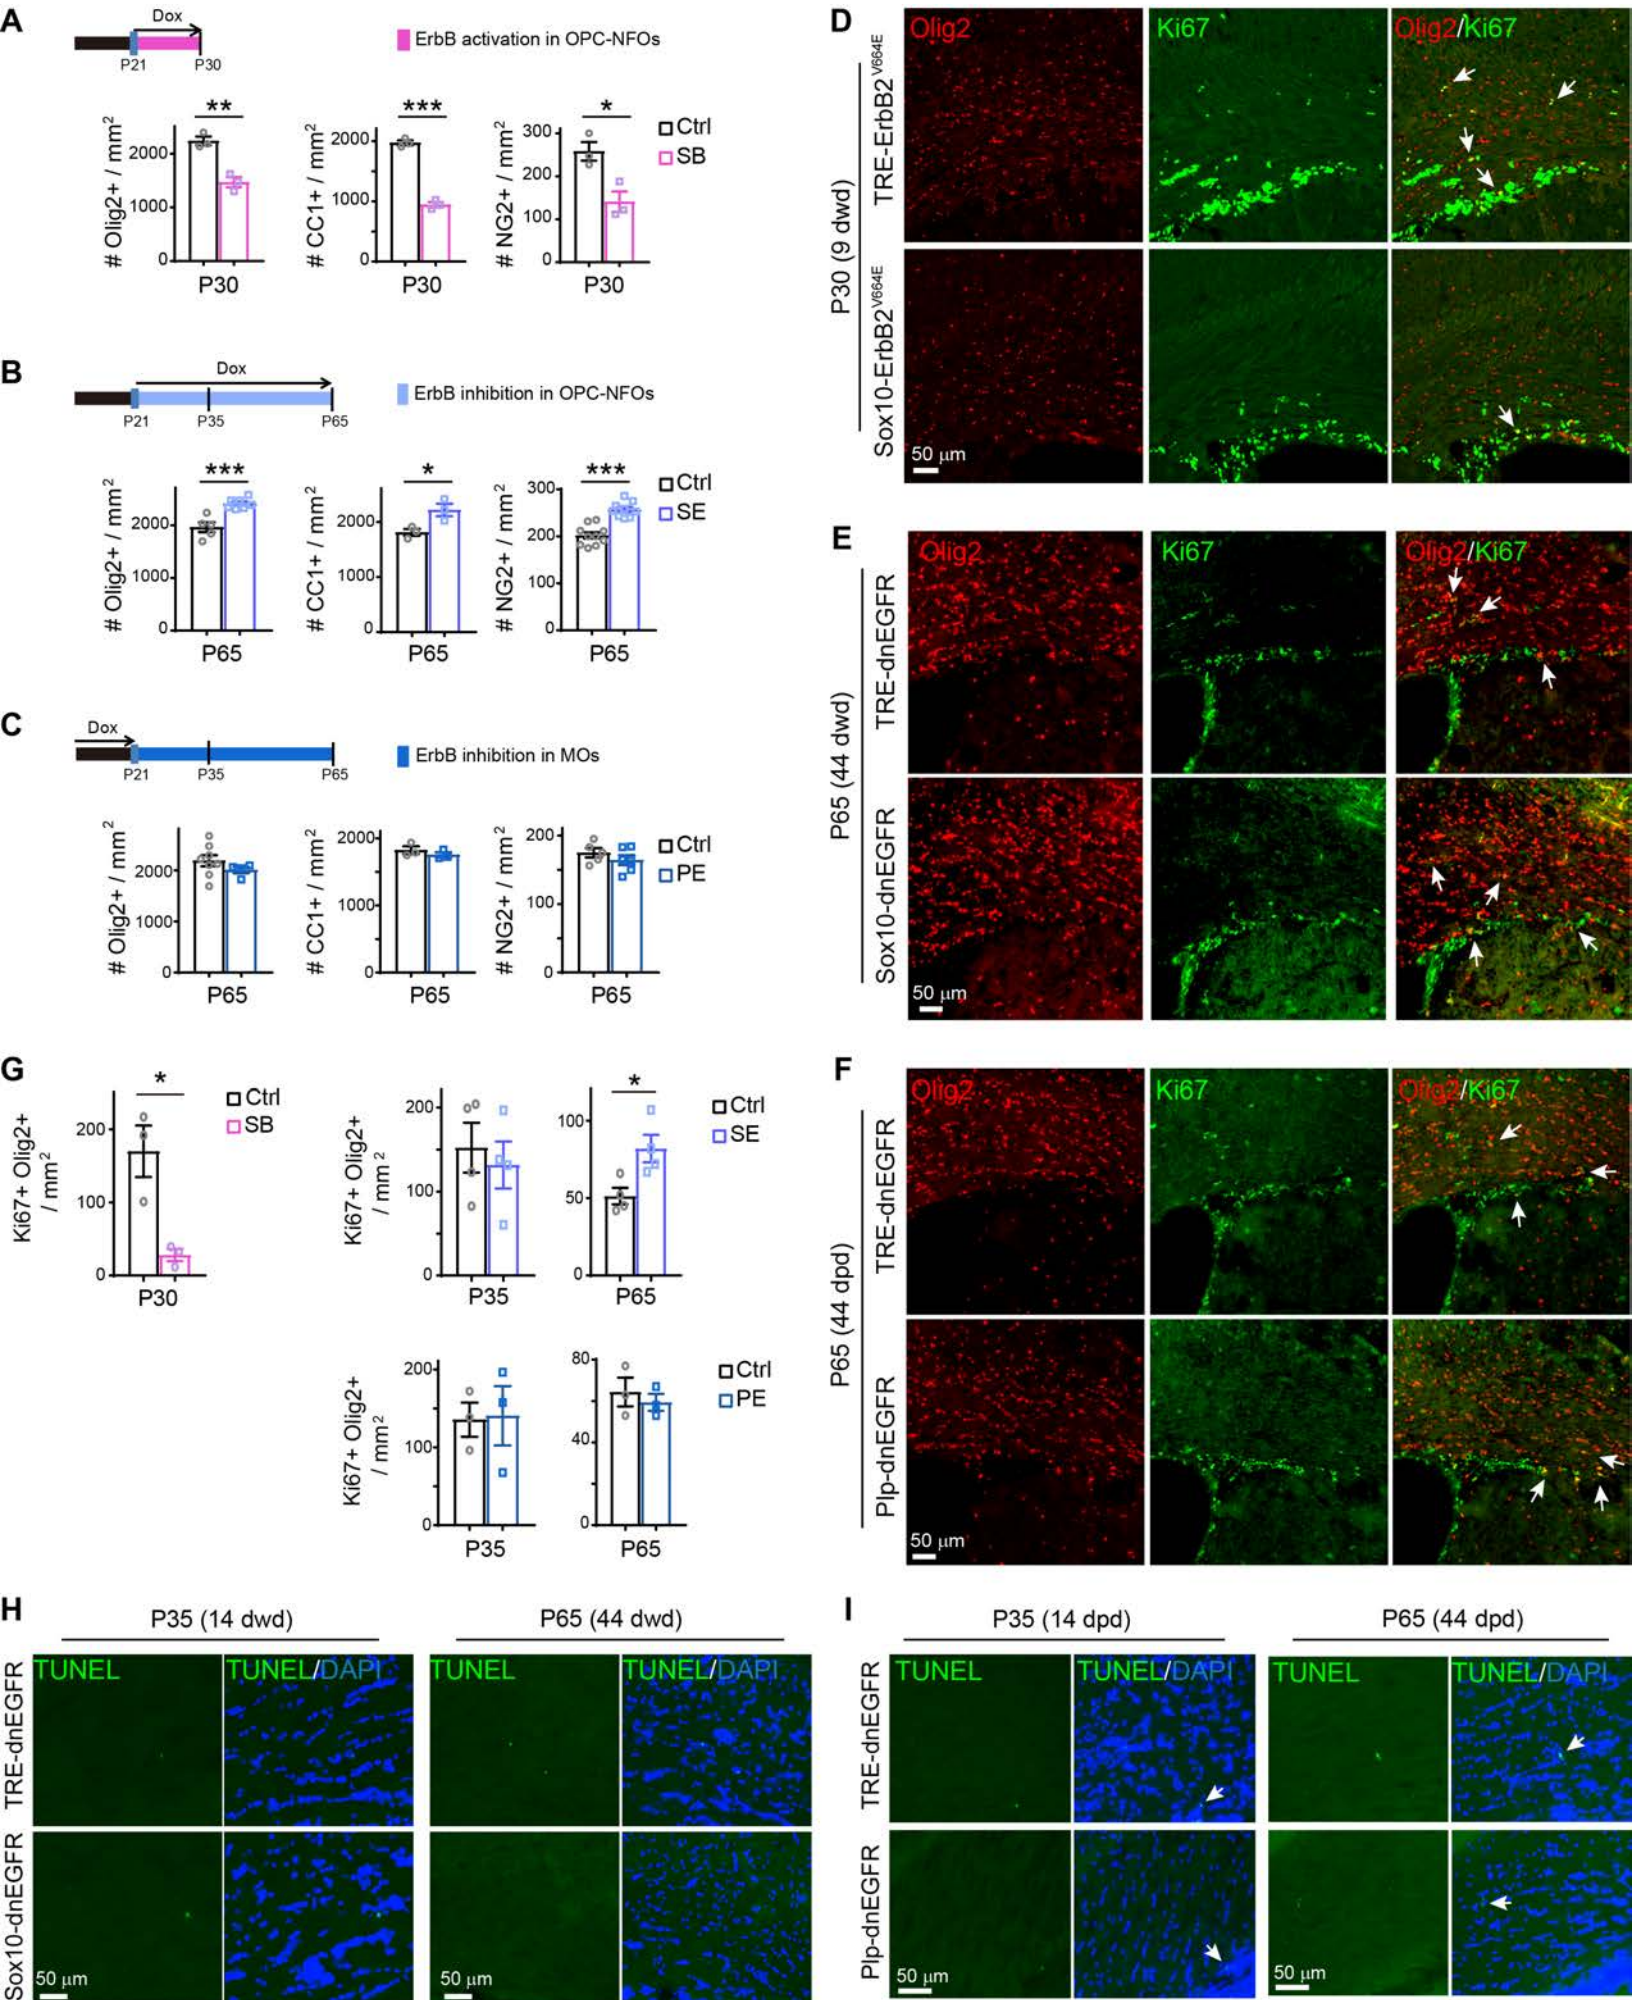

Figure 5

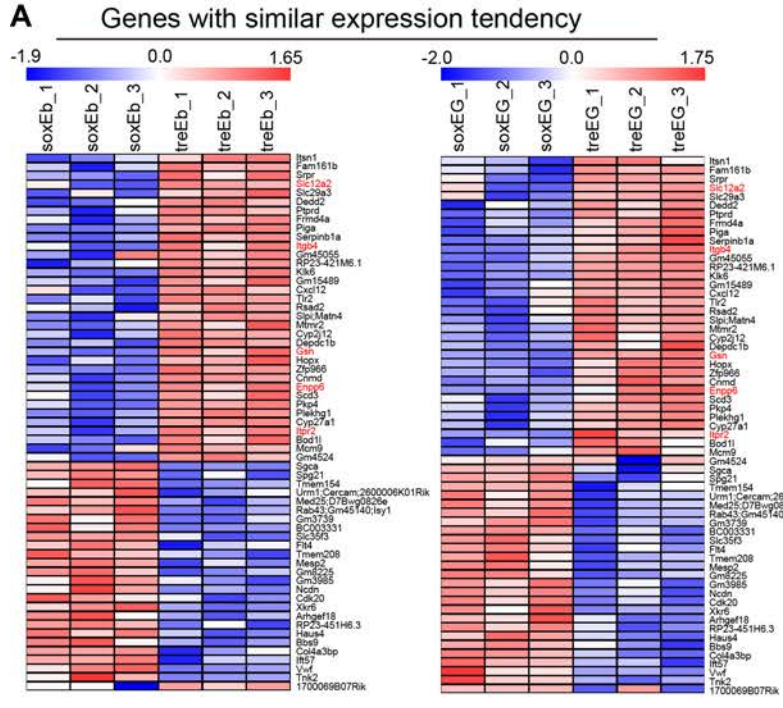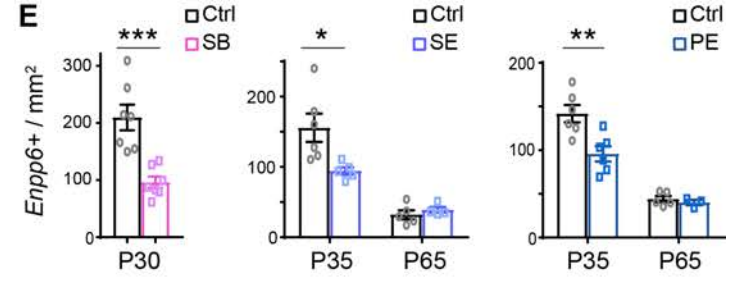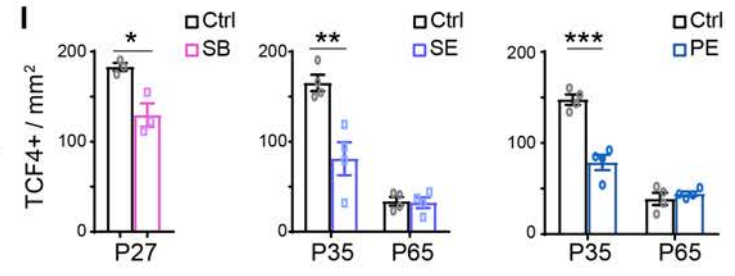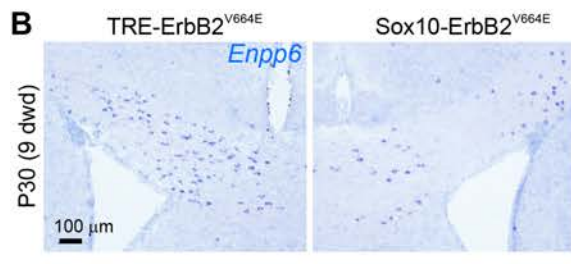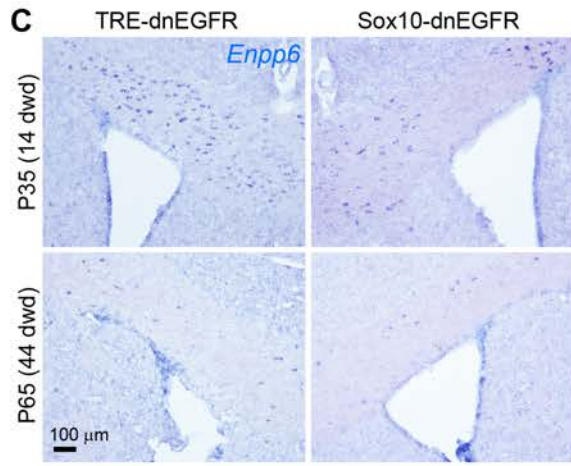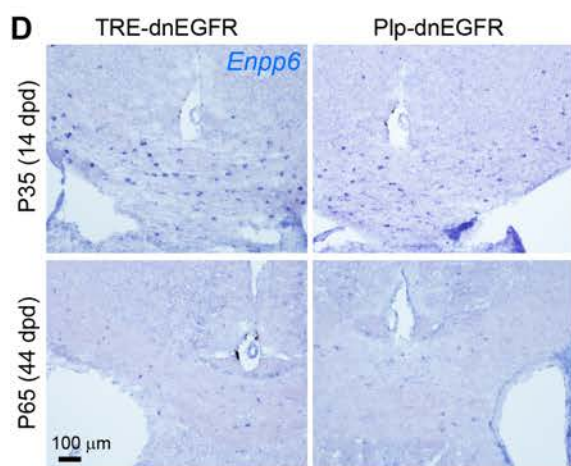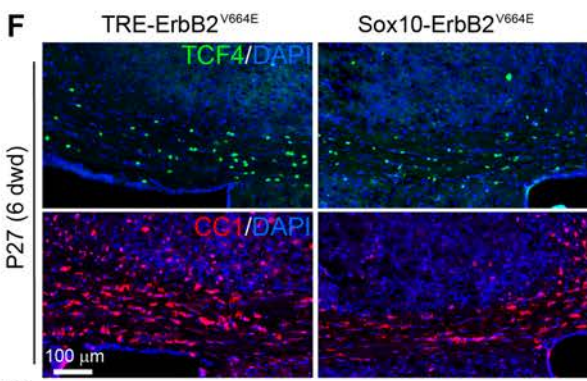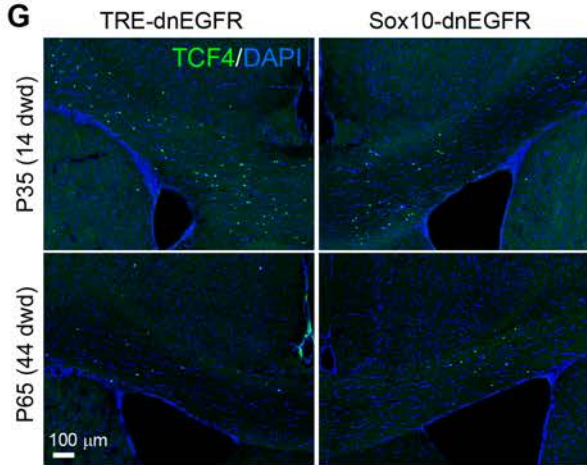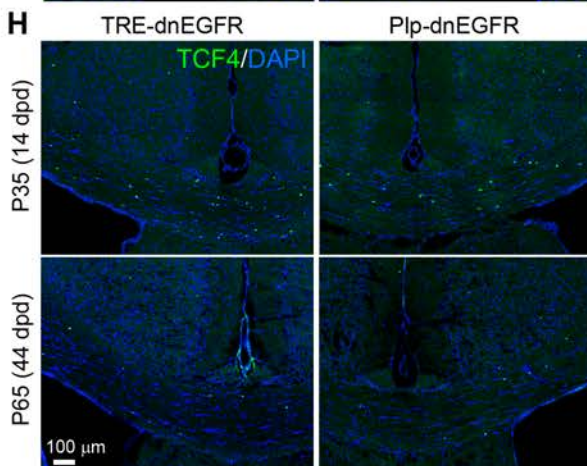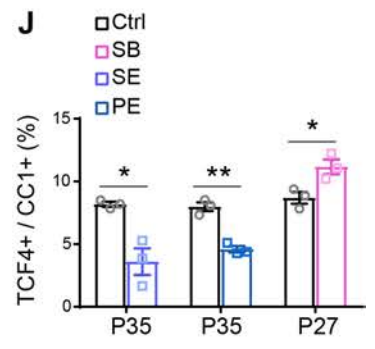

Figure 6



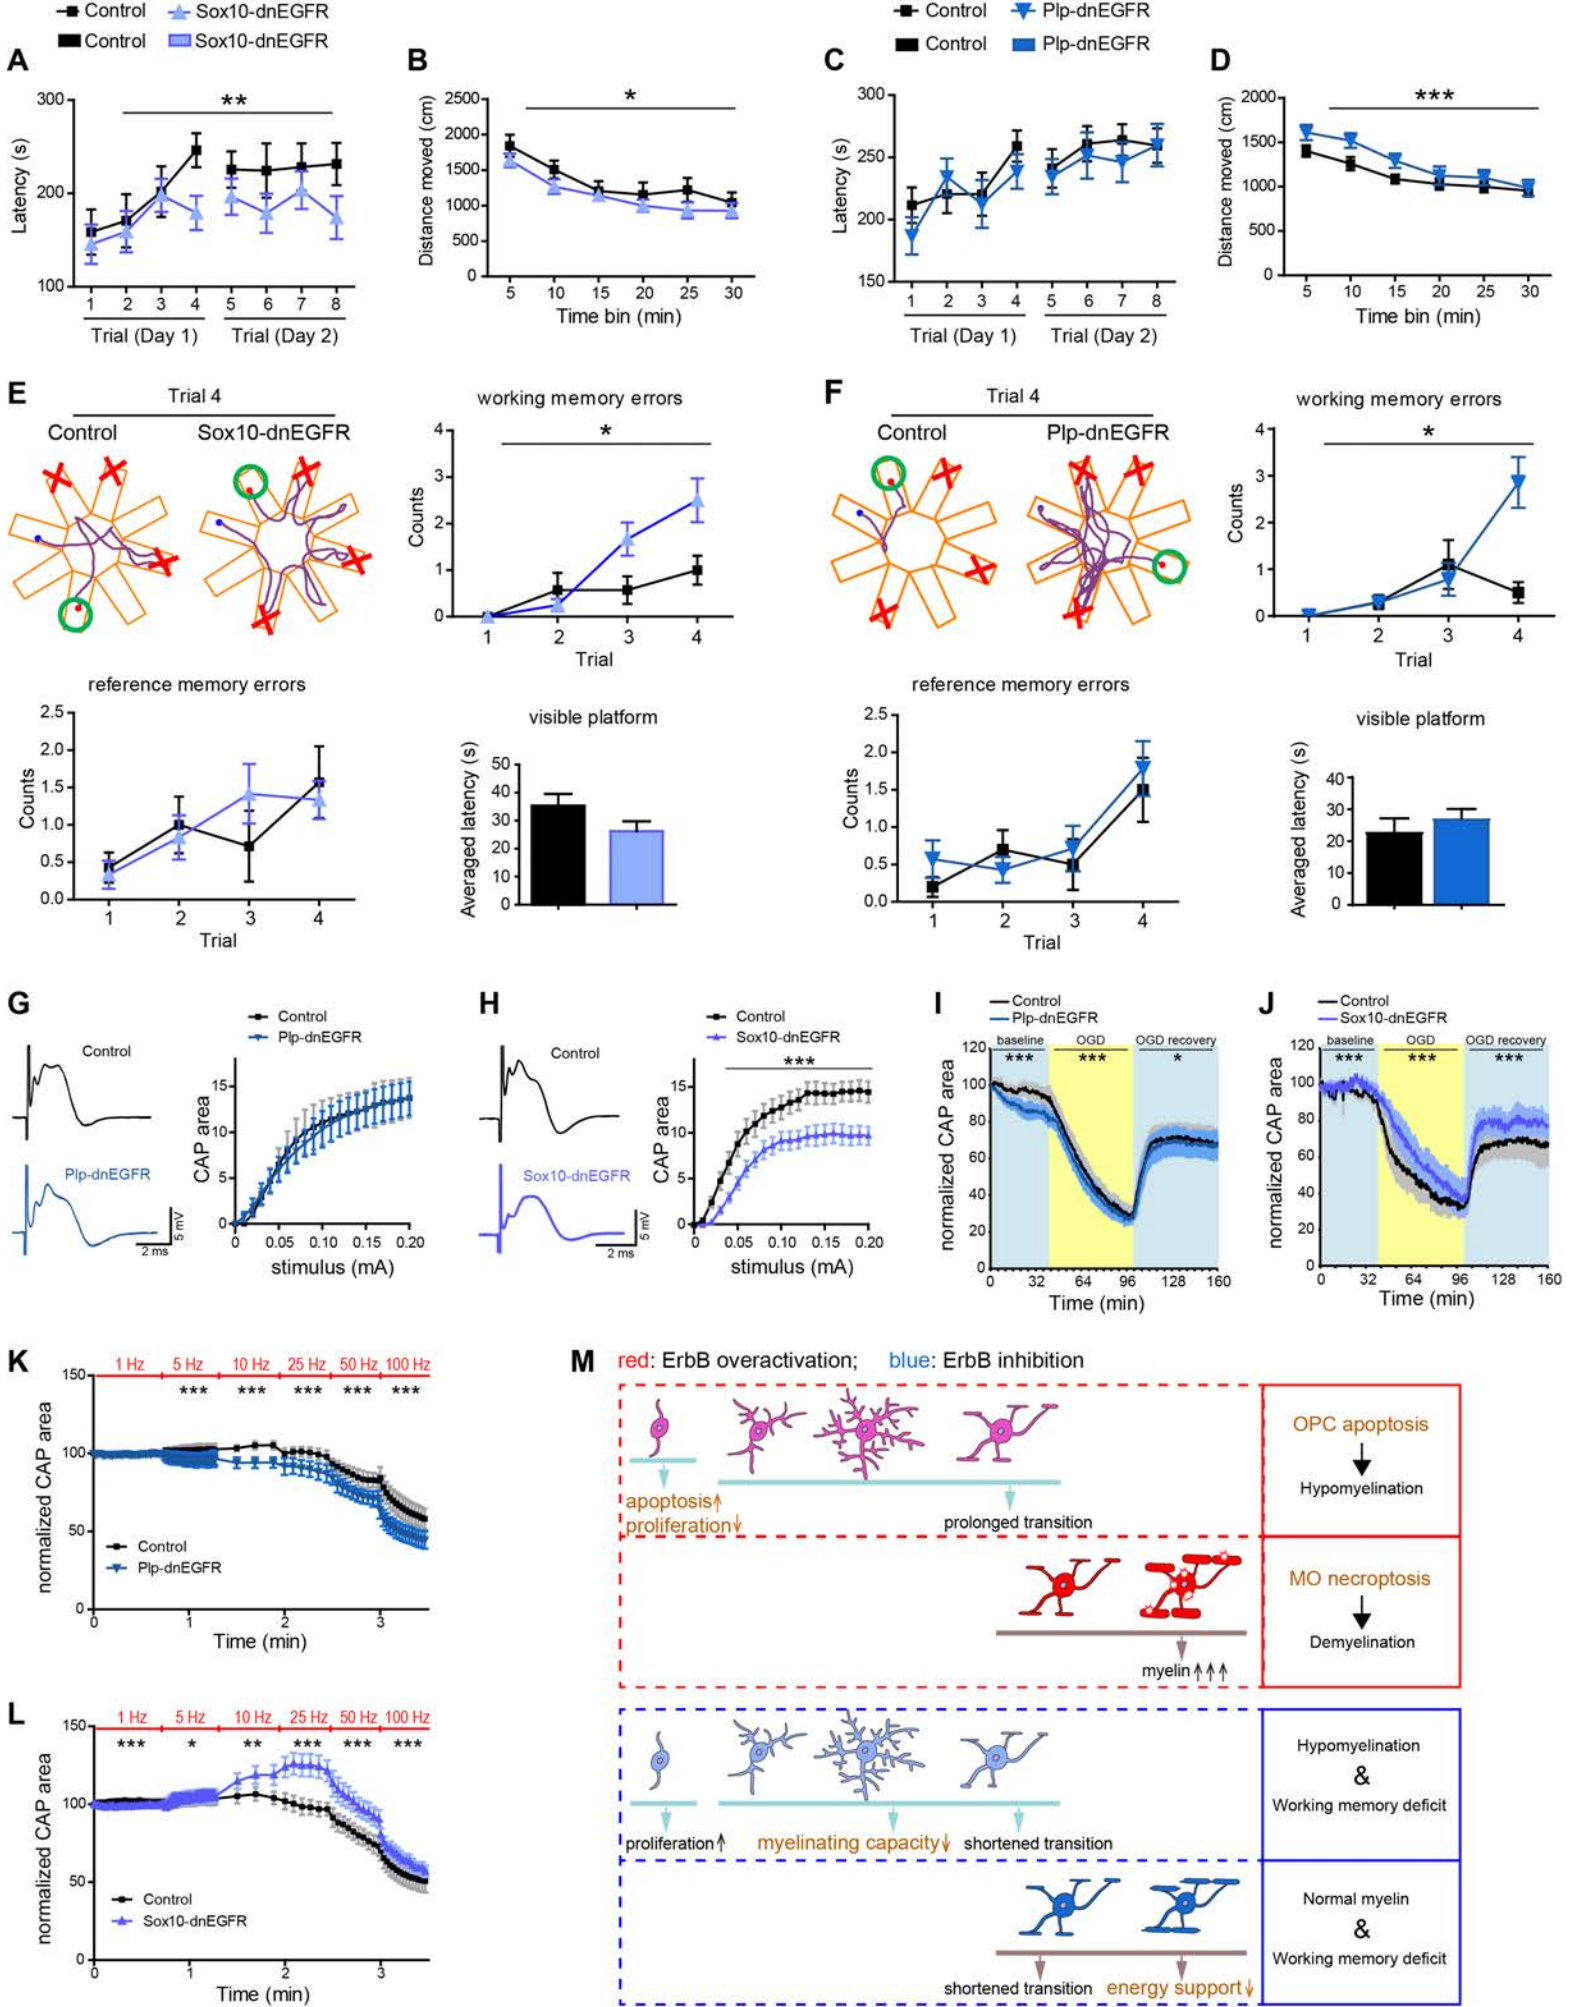

Figure 7

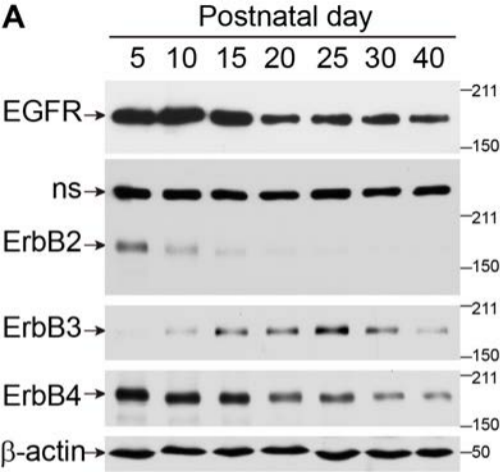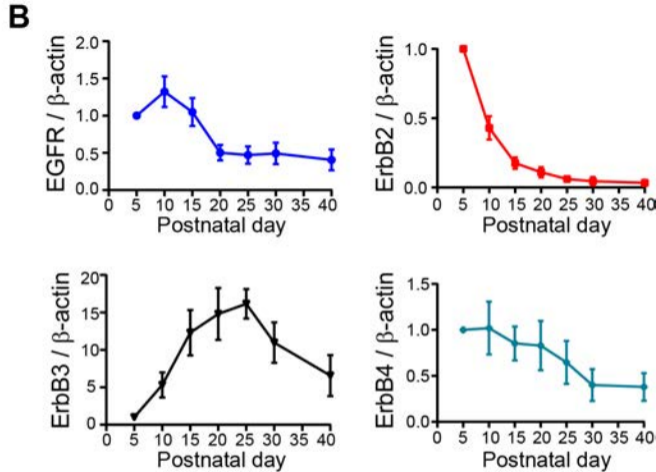

Figure 1- figure supplement 1

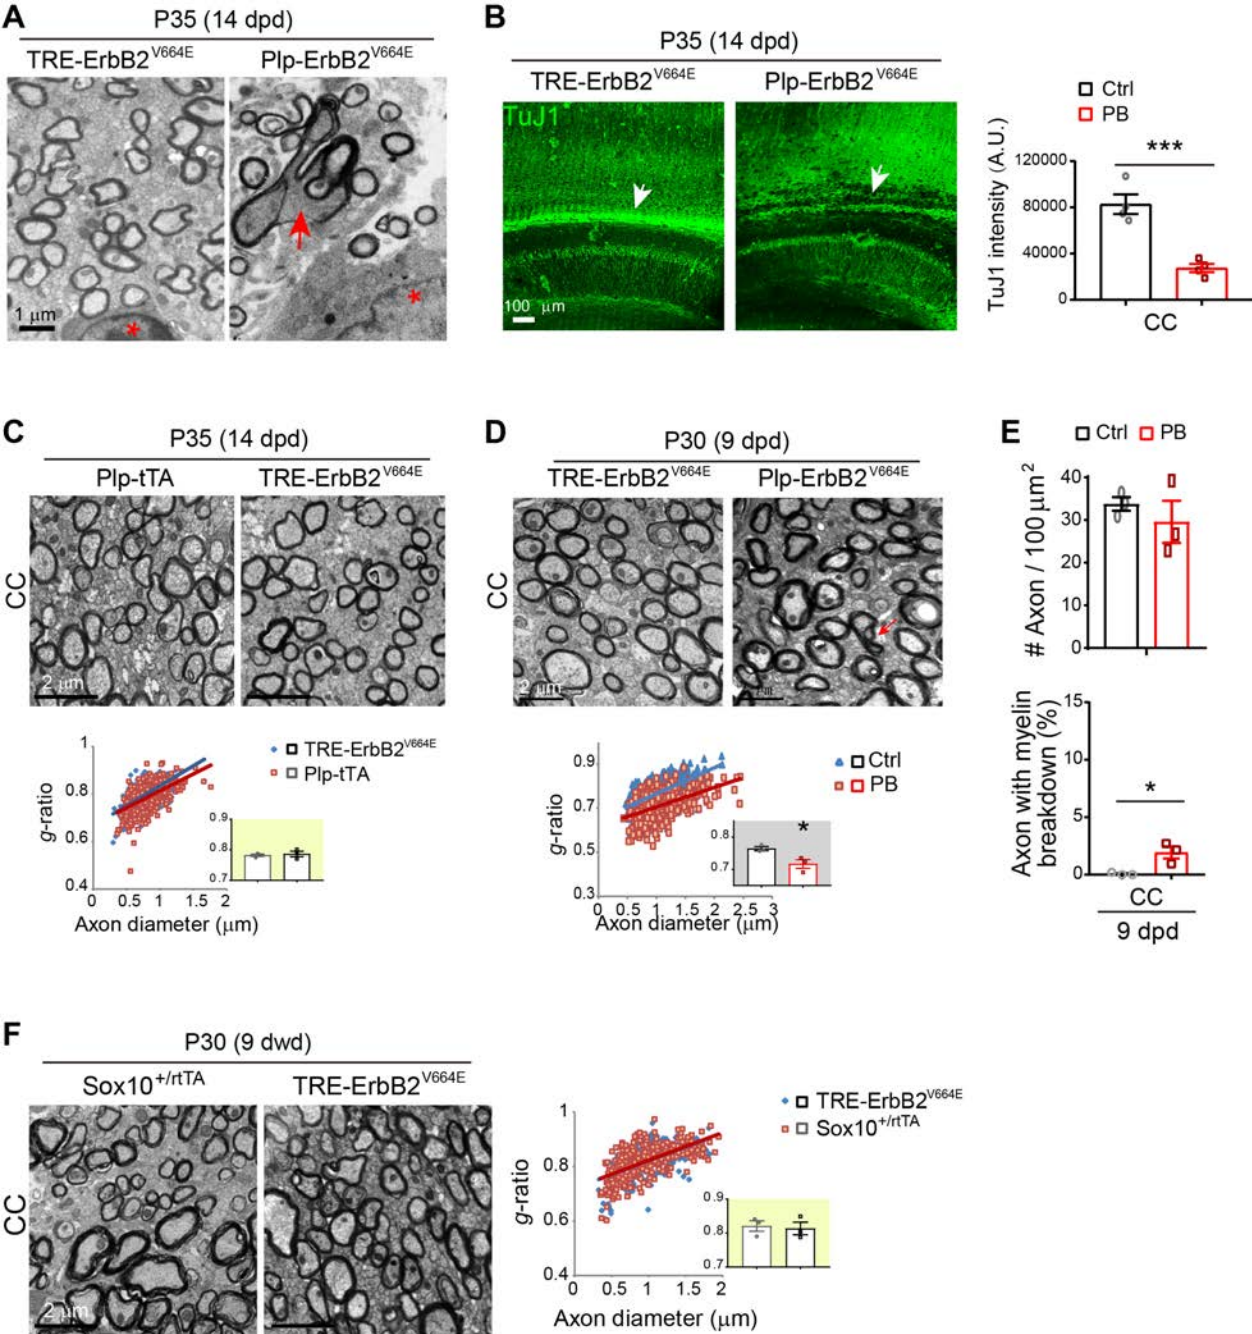

Figure 1- figure supplement 2

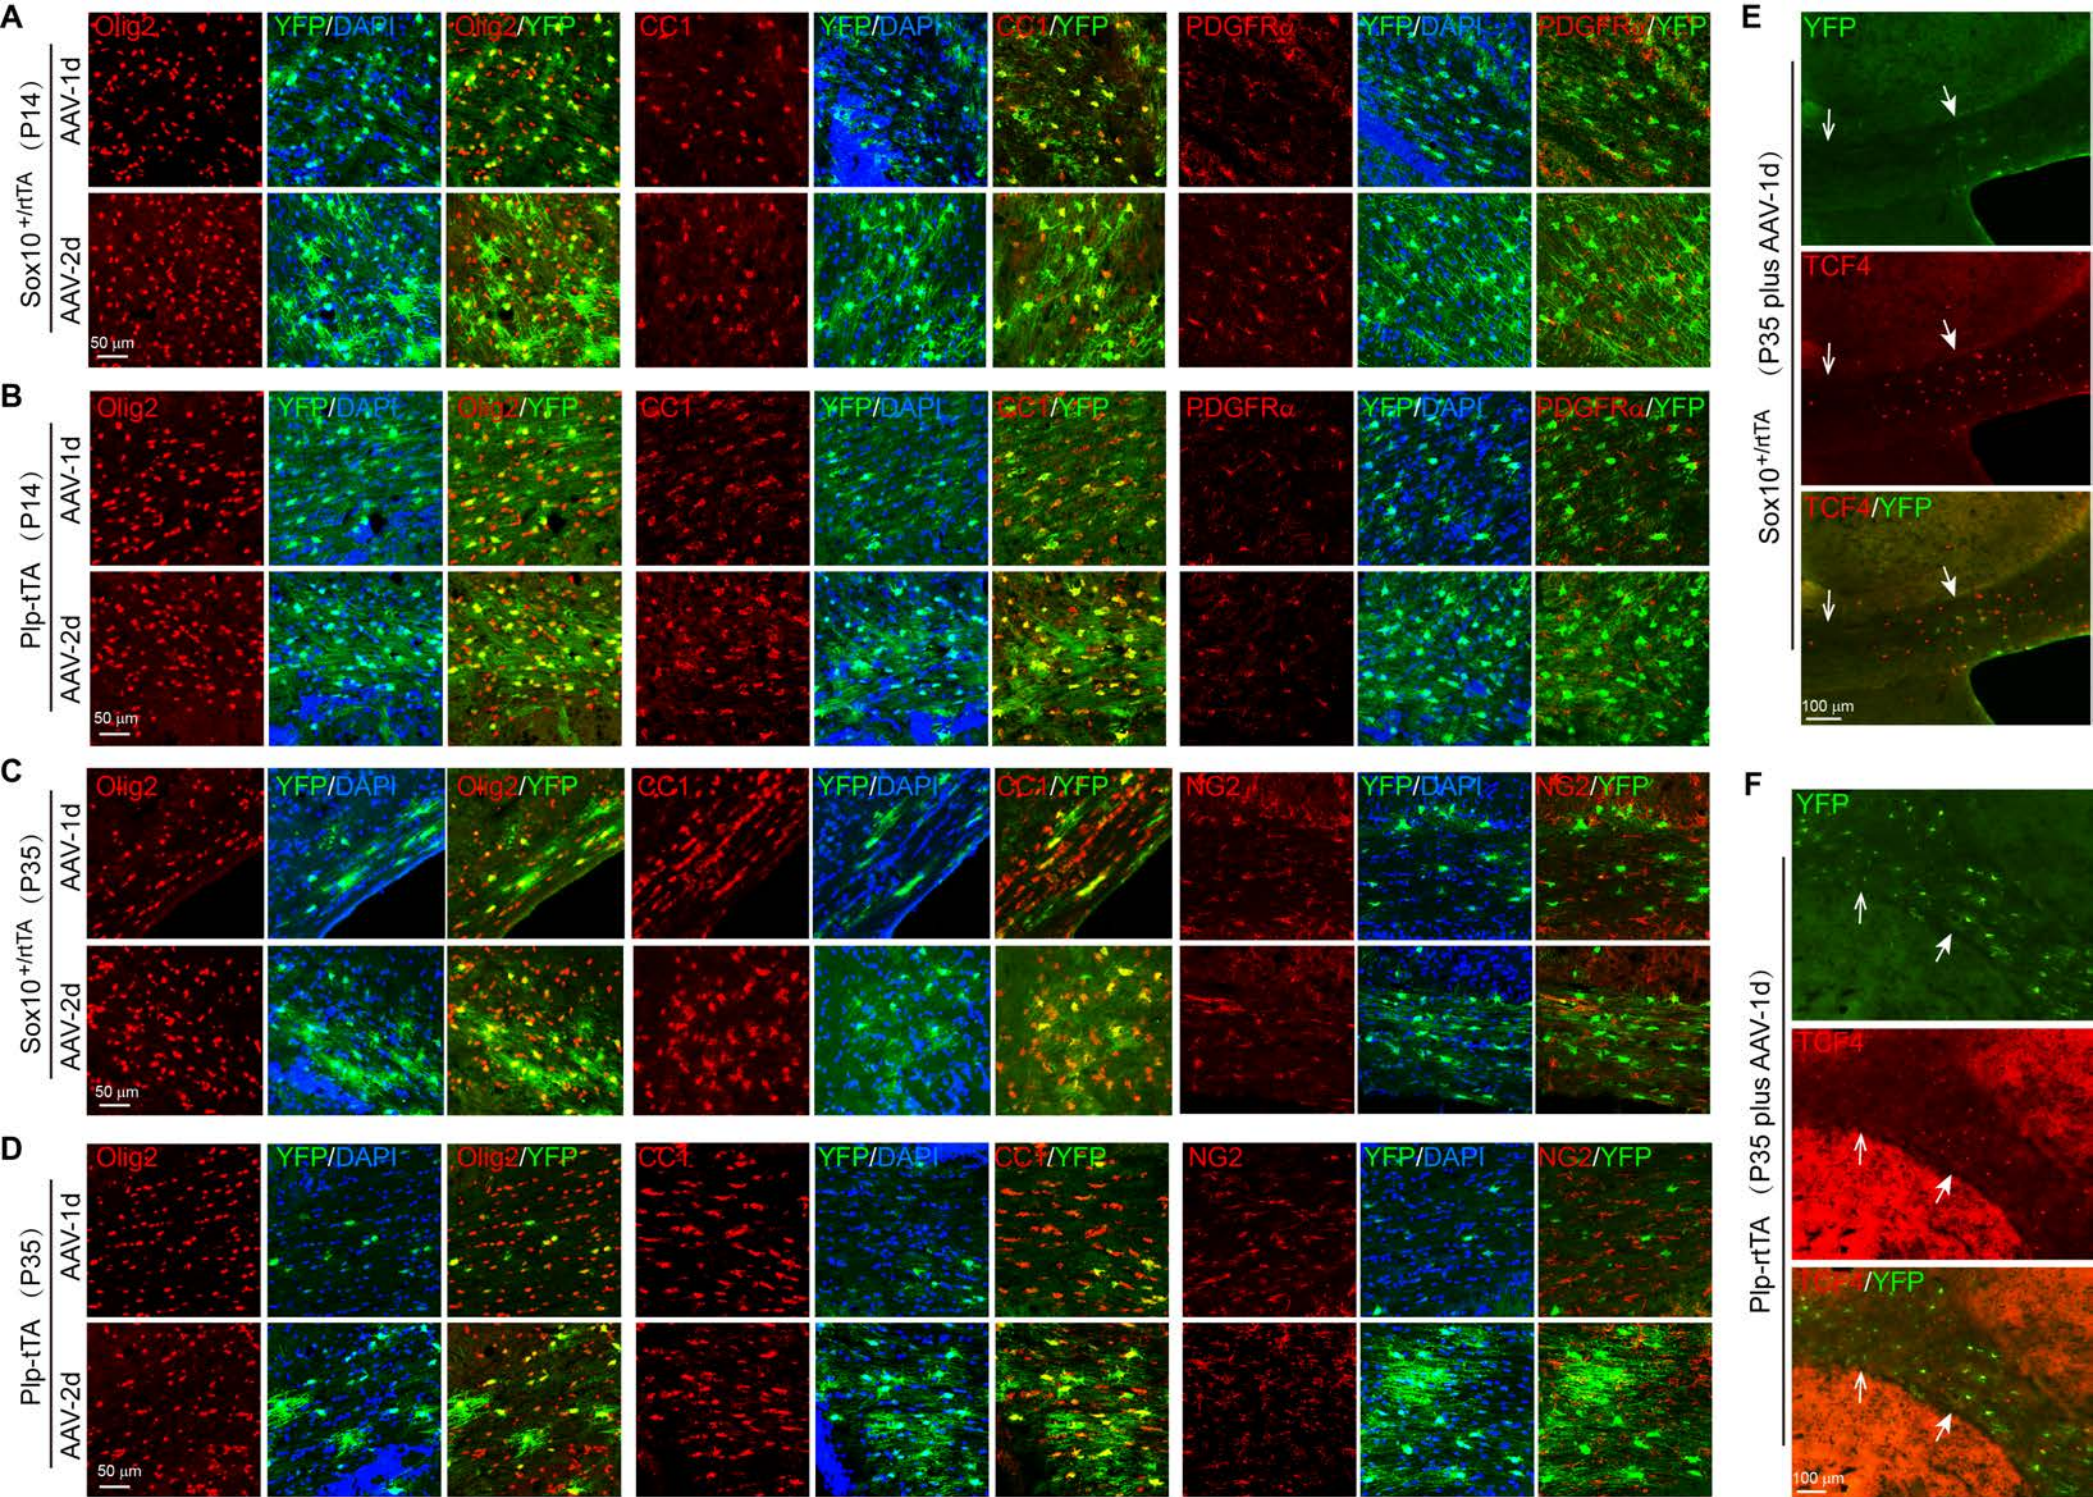

Figure 2- figure supplement 1

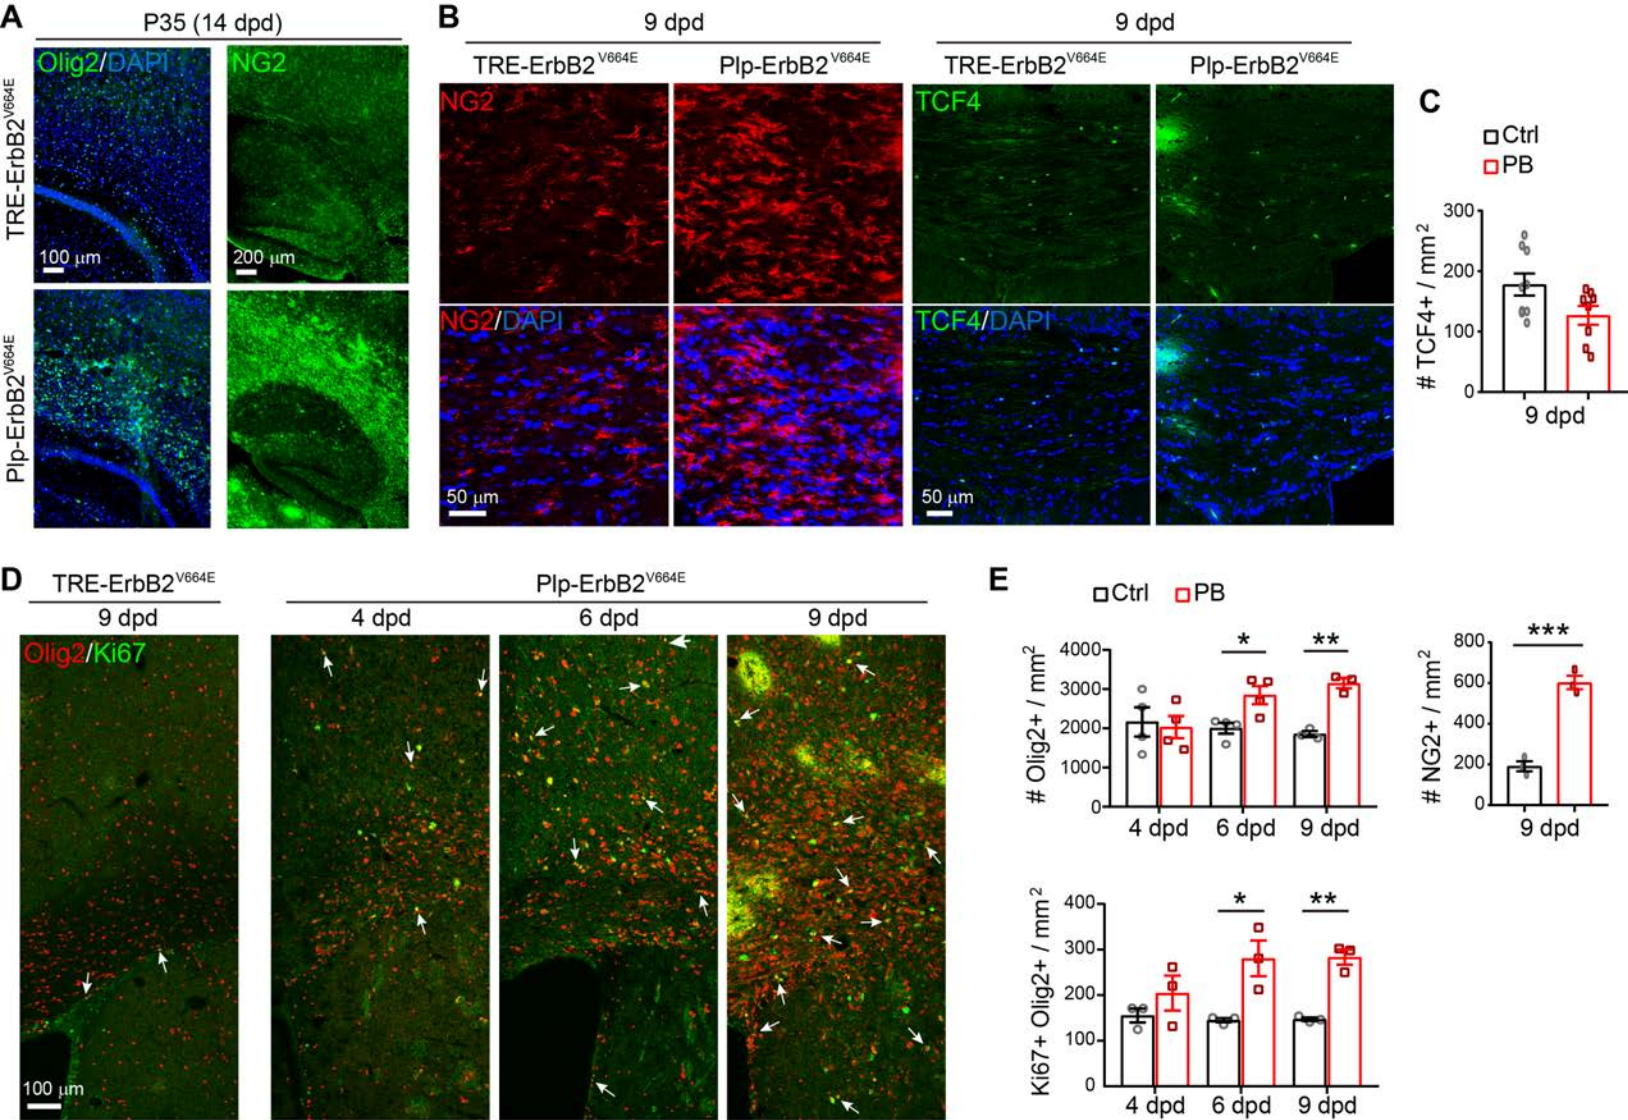

Figure 3- figure supplement 1

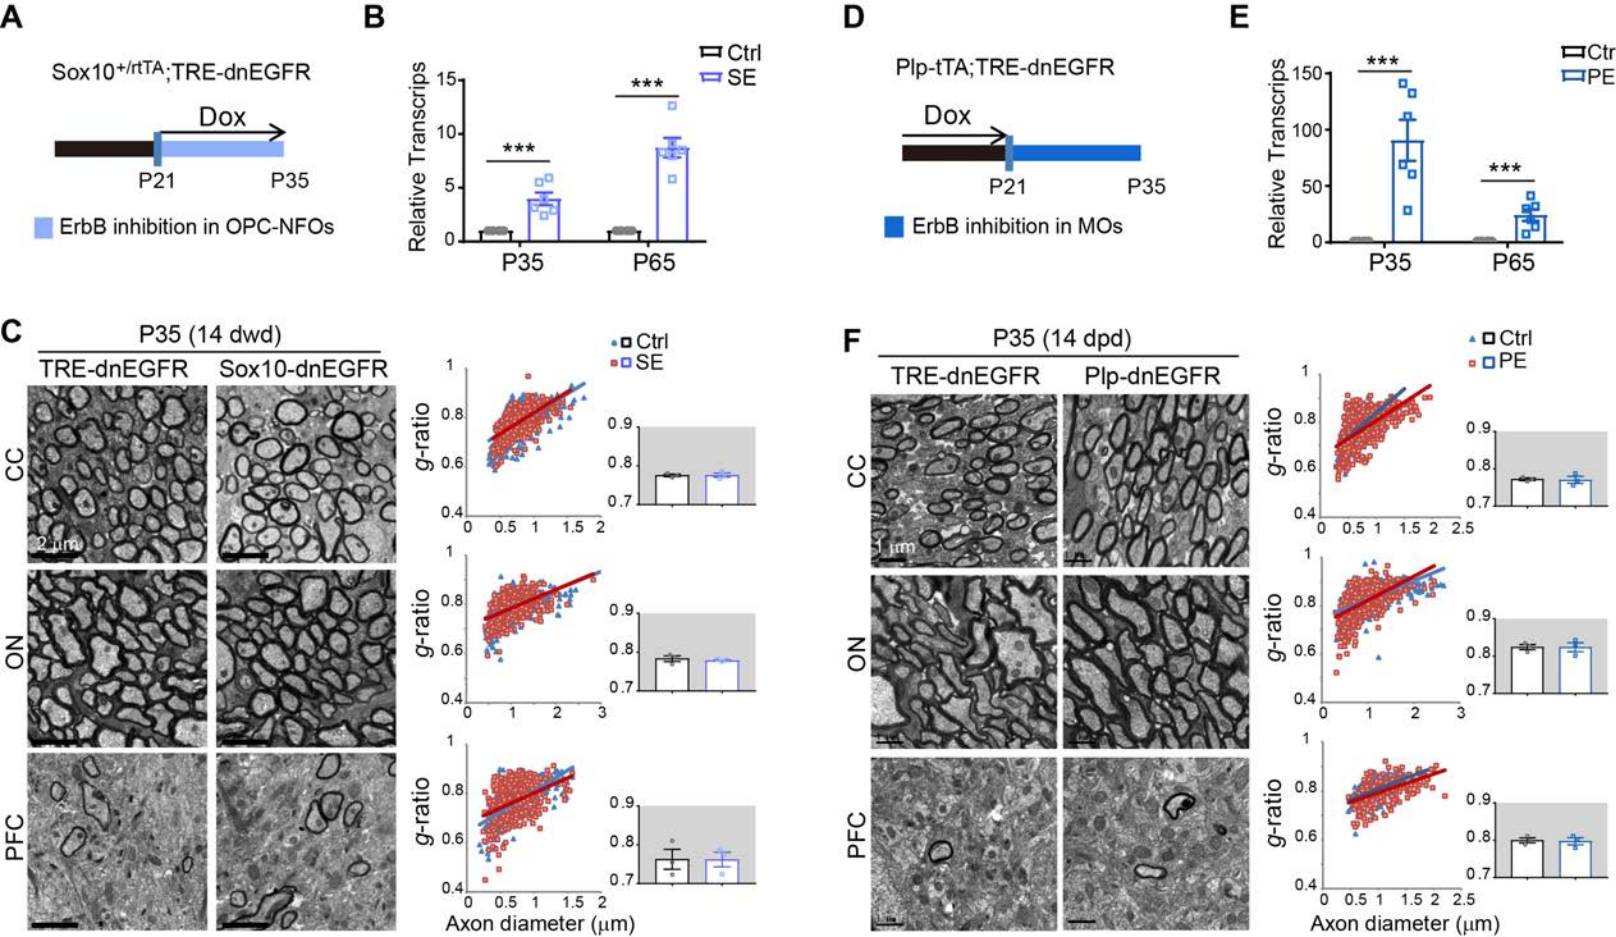

Figure 4- figure supplement 1

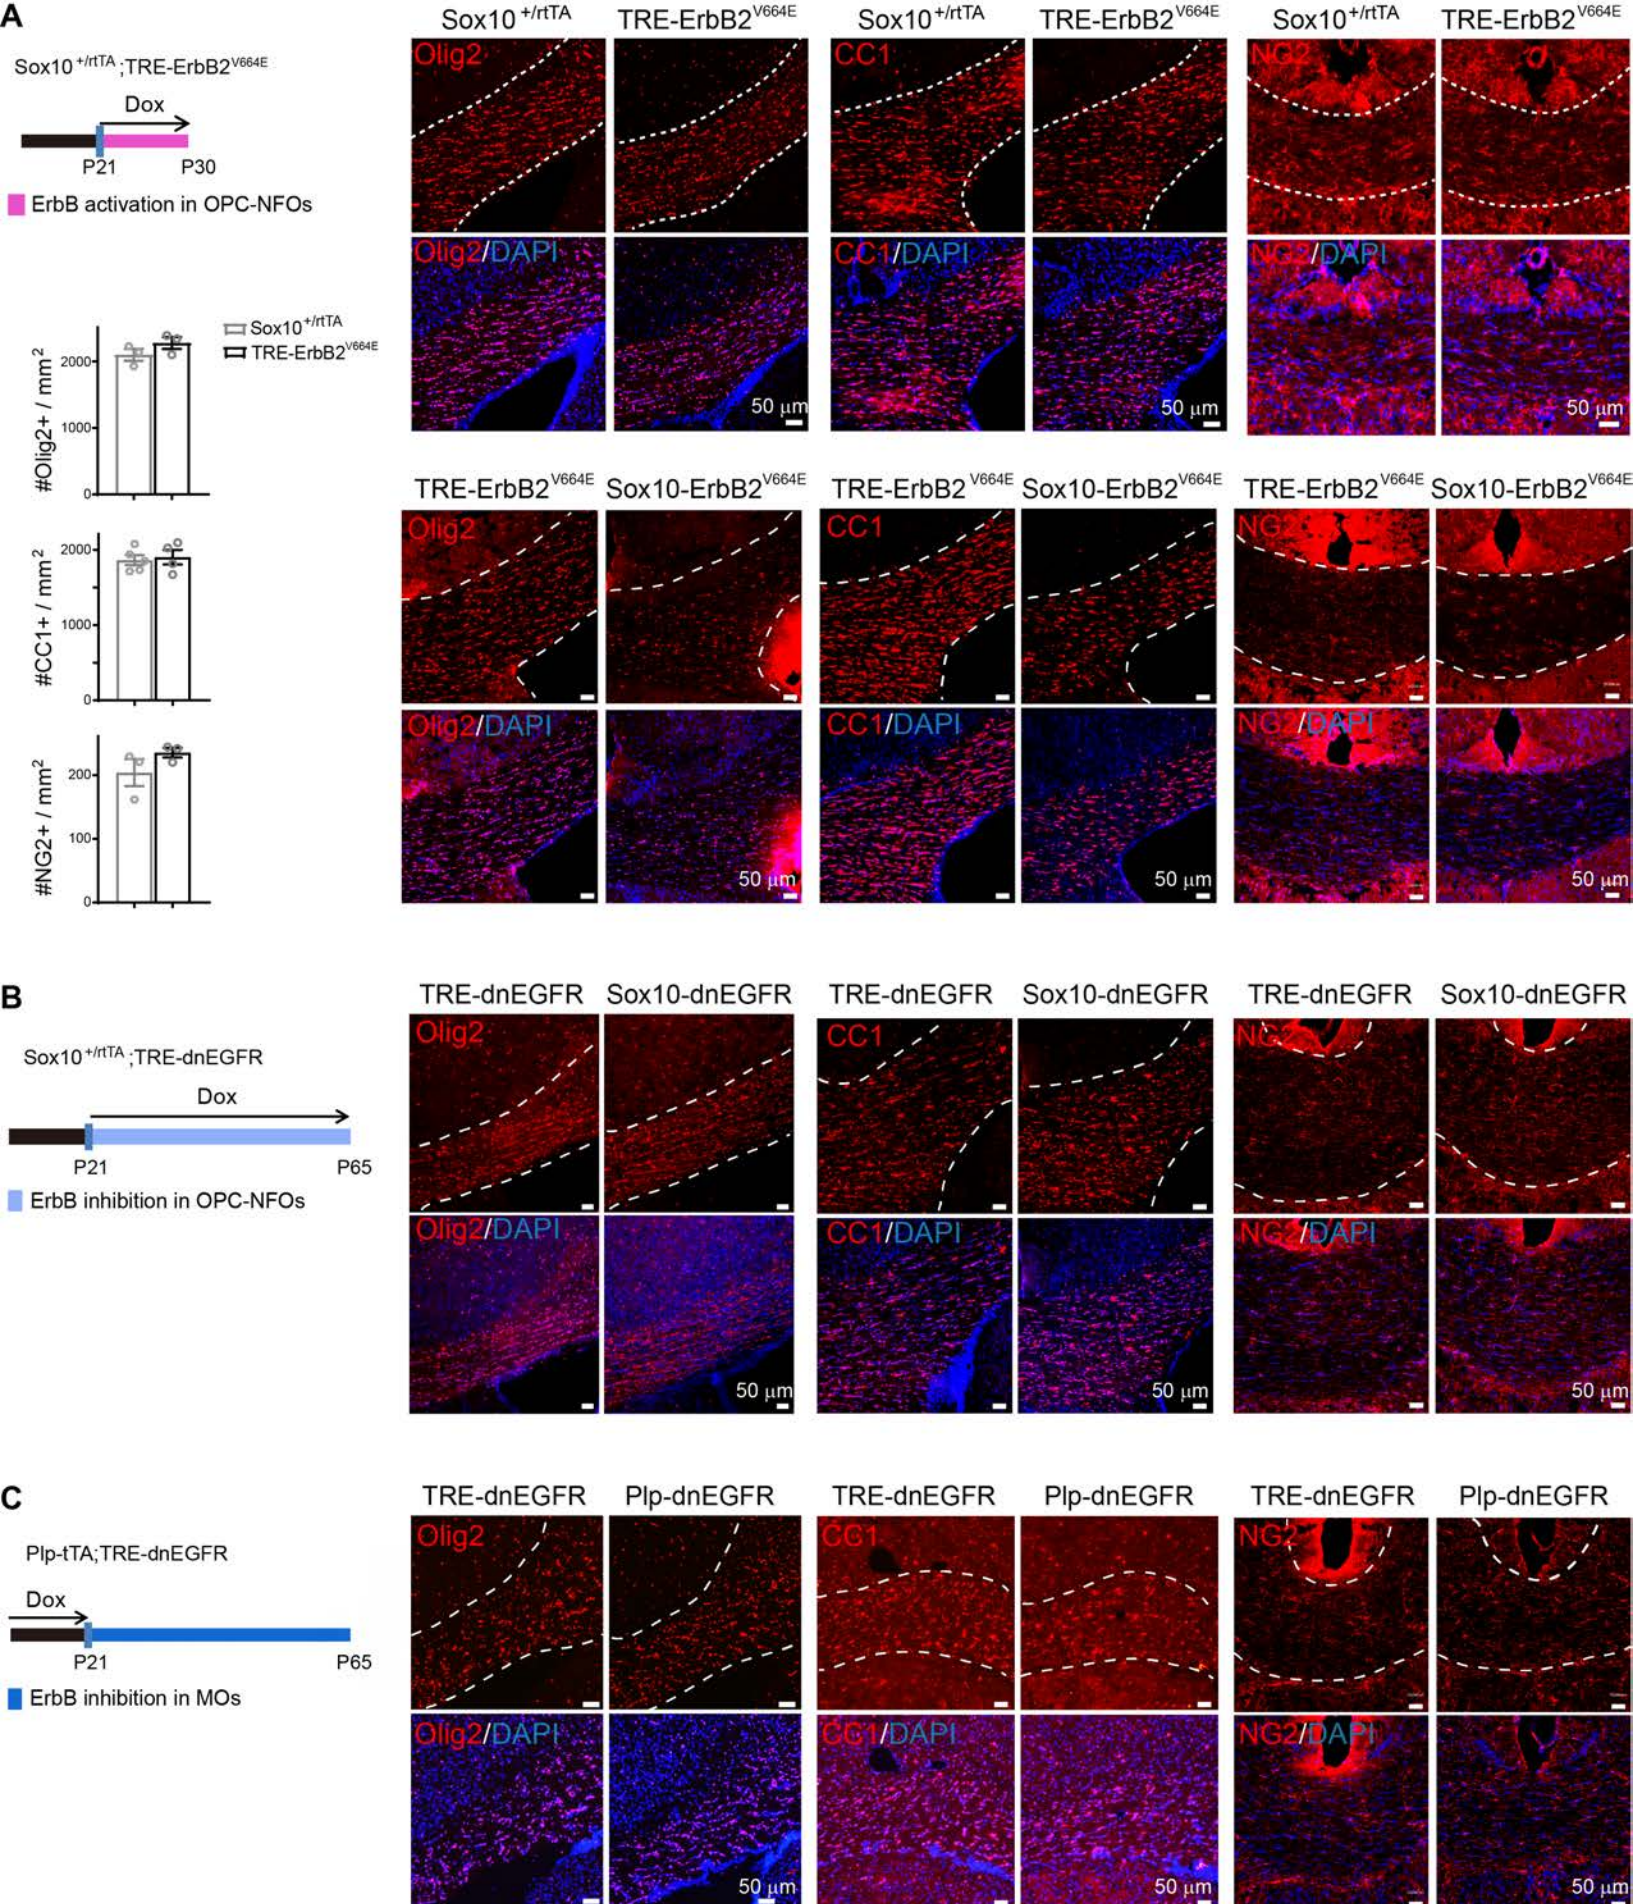

Figure 5- figure supplement 1

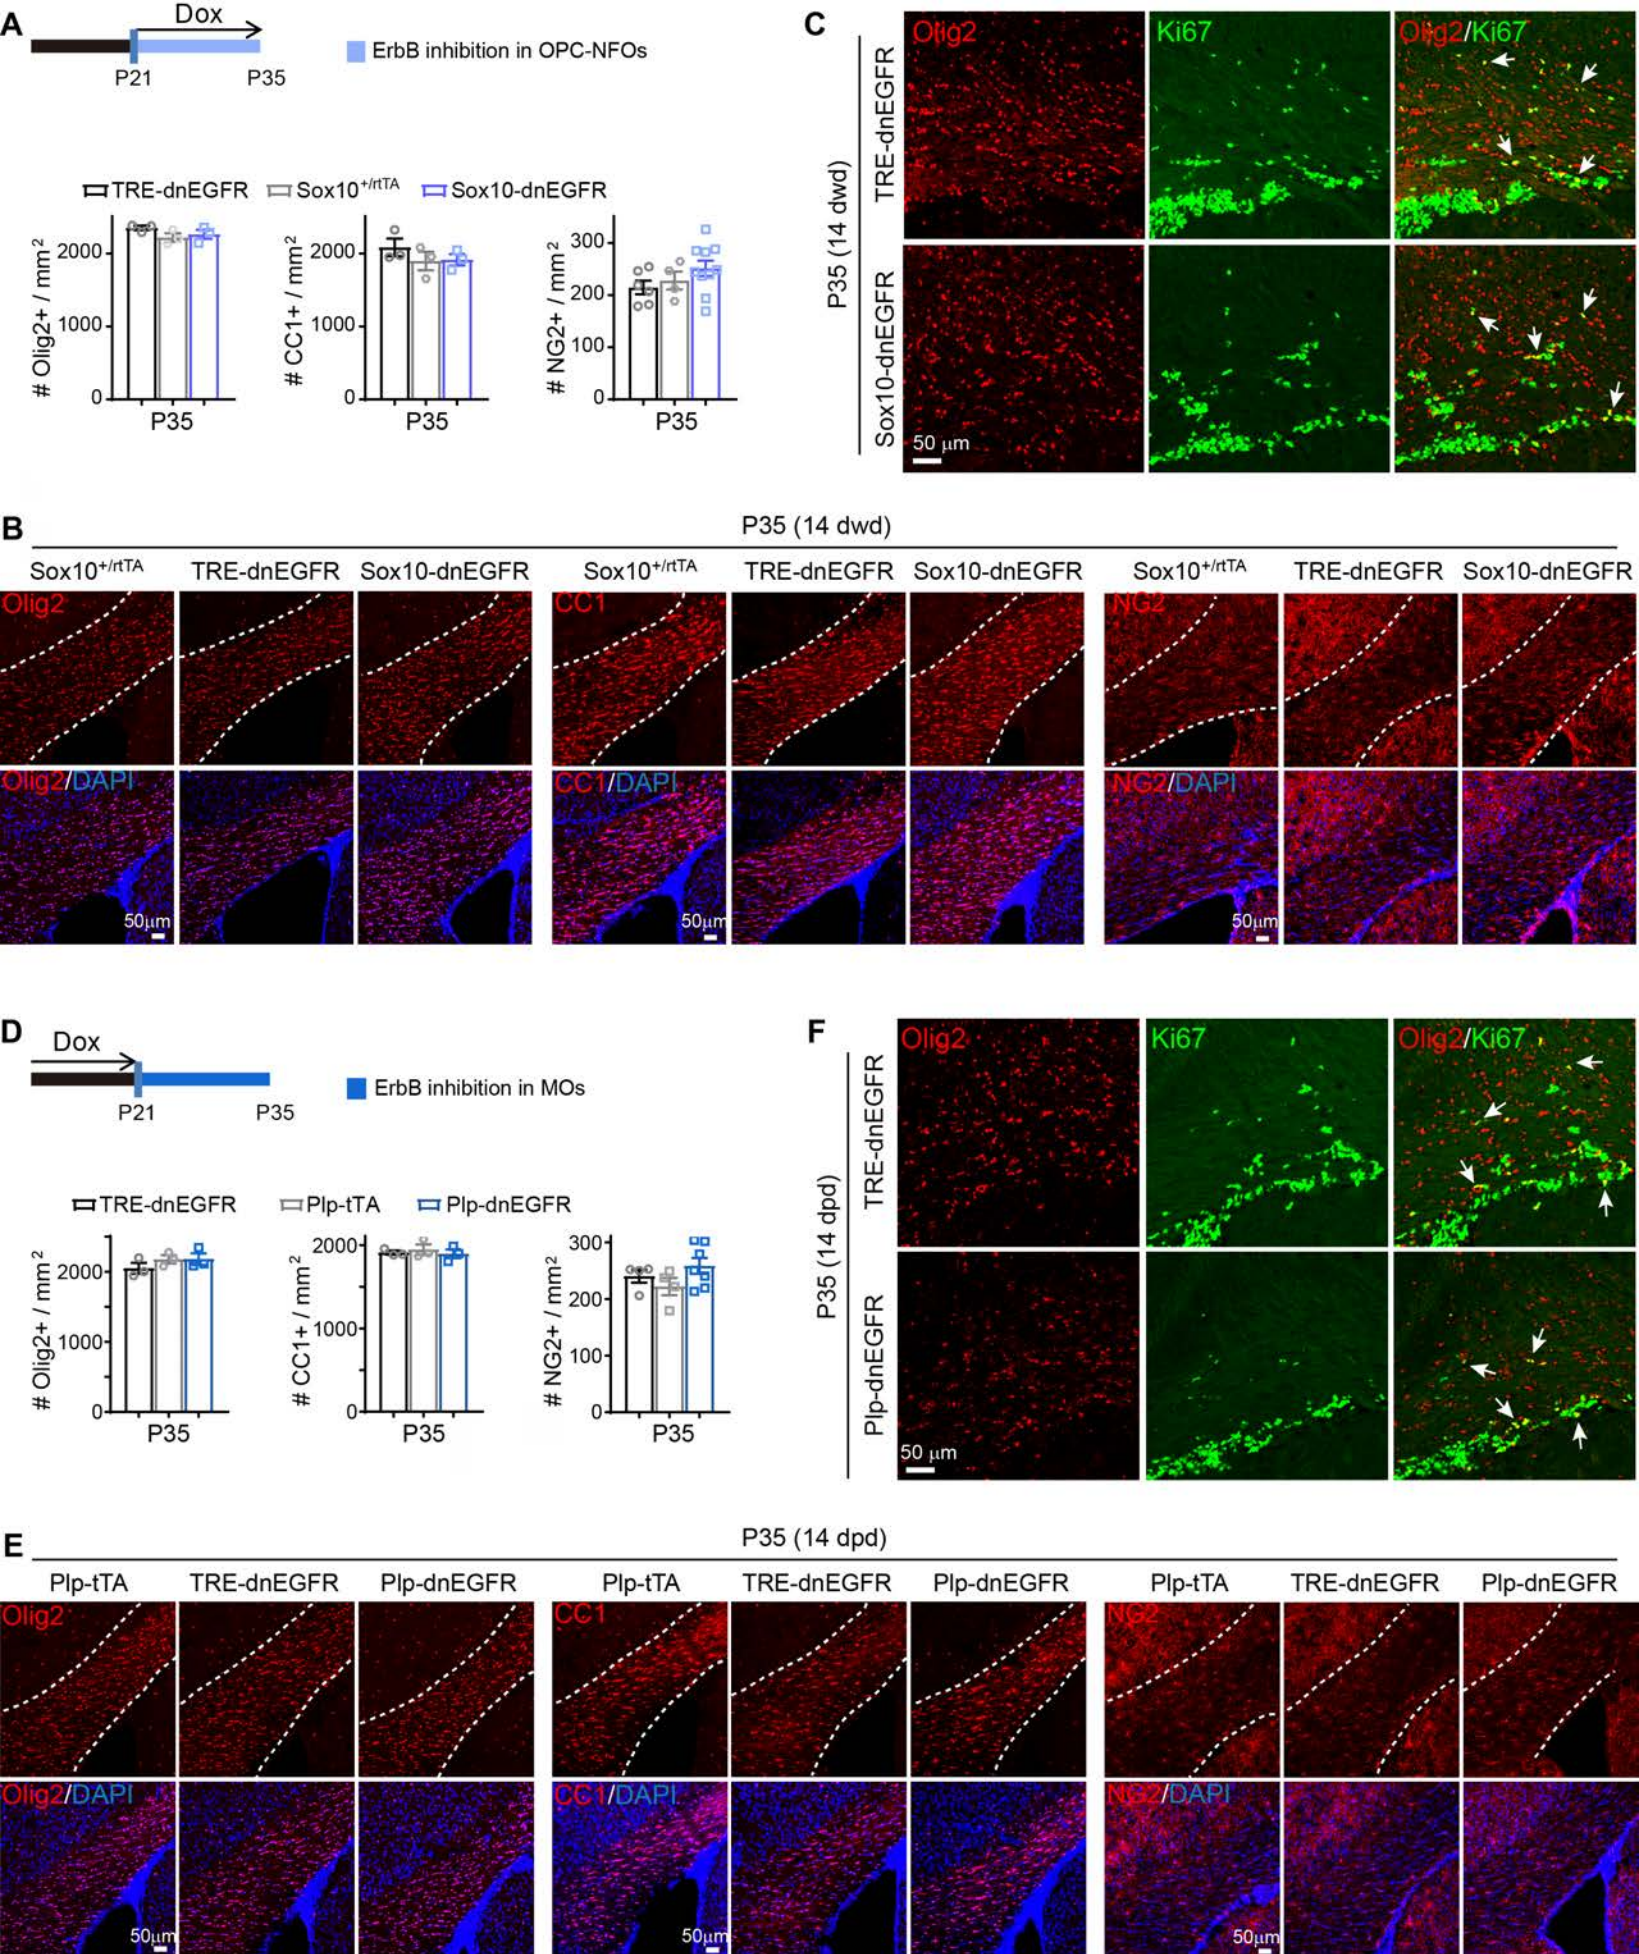

Figure 5- figure supplement 2



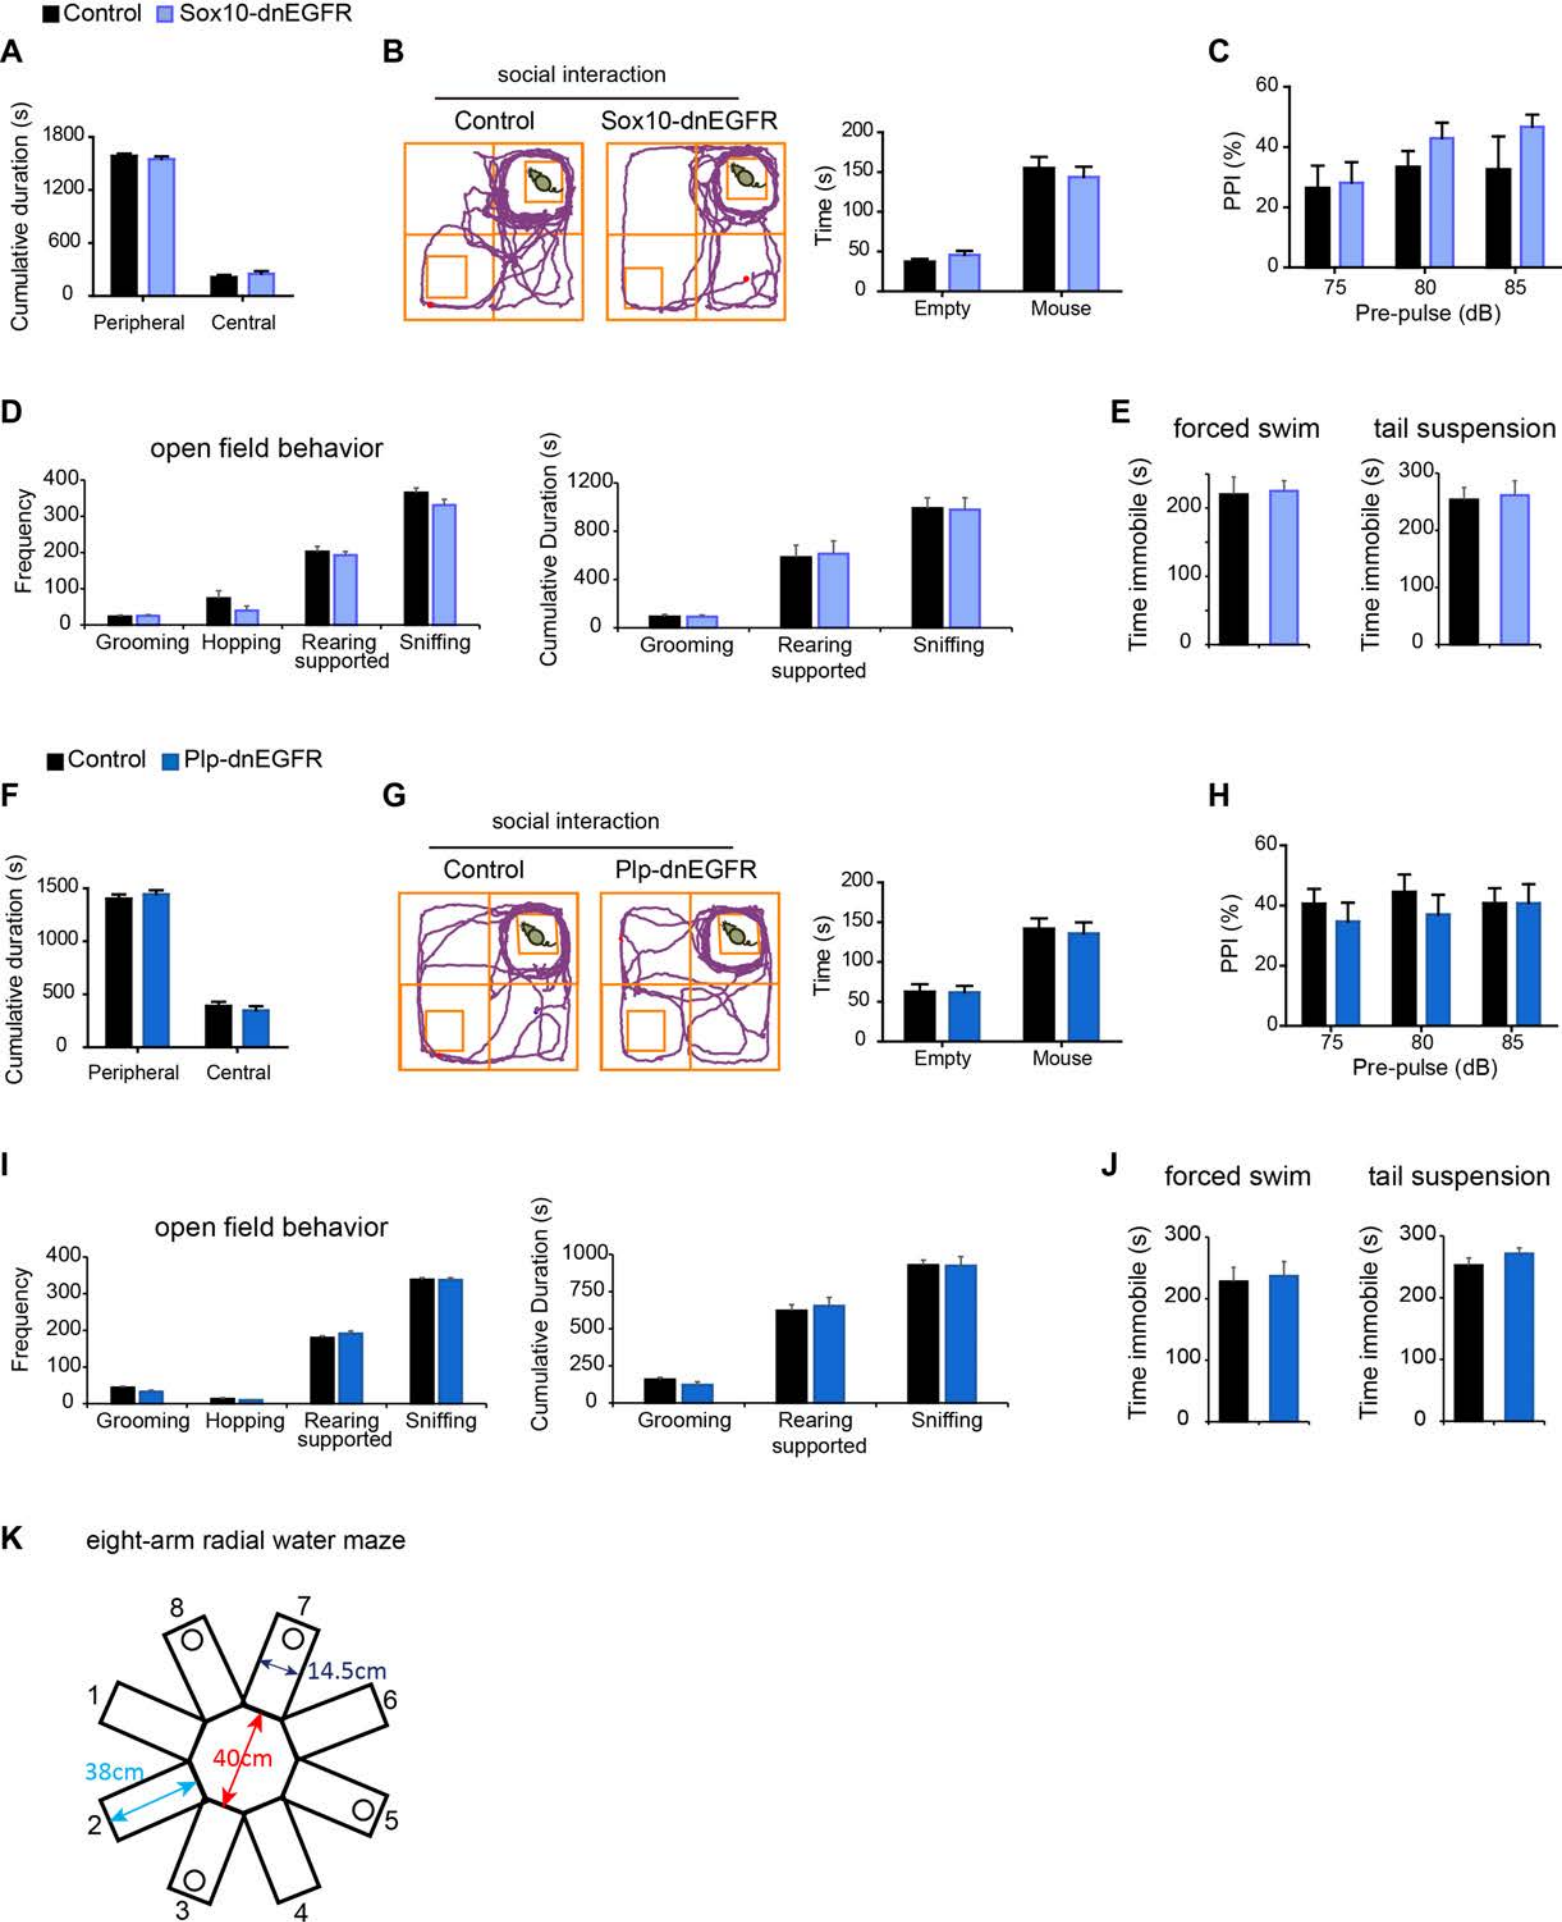

Figure 7- figure supplement 1
